# Supplementary material
Source: publisher figshare collection journal article supplement (https://diabetesjournals.figshare.com/ndownloader/files/40400858)
Supplement: Supplementary file 1 [file 40400858]

## **SUPPLEMENTARY MATERIAL:**

### **TRANSCEND Consortium Group Members**

(TRansomics ANalysis of Complications and ENdpoints in Diabetes)

Ronald C.W. Ma<sup>1,2,3,4</sup>, Juliana C.N. Chan<sup>1,2,3</sup>, Yu Huang<sup>5</sup>, Hui-yao Lan<sup>1,3</sup>, Si Lok<sup>3</sup>, Brian Tomlinson<sup>1</sup>, Stephen K.W. Tsui<sup>5</sup>, Weichuan Yu<sup>6</sup>, Kevin Y.L. Yip<sup>7</sup>, Ting-fung Chan<sup>8</sup>, Xiaodan Fan<sup>9</sup>, Wing-yee So<sup>1,2</sup>, Cheuk-chun Szeto<sup>1</sup>, Nelson L.S. Tang<sup>3</sup>, Andrea O.Y. Luk<sup>1,2,3</sup>, Xiaoyu Tian<sup>5</sup>, Claudia H.T. Tam<sup>1,2</sup>, Guozhi Jiang<sup>1,2</sup>, Heung Man Lee<sup>1</sup>, Cadmon K.P. Lim<sup>1,2</sup>, Katie K.H. Chan<sup>2</sup>, Fangying Xie<sup>1</sup>, Alex C.W. Ng<sup>1</sup>, Grace P.Y. Cheung<sup>1</sup>, Ming-wai Yeung<sup>1</sup>, Shi Mai<sup>5</sup>, Fei Xie<sup>1</sup>, Wei Jiang<sup>6</sup>, Sen Zhang<sup>6</sup>, Pu Yu<sup>6</sup>, Meng Weng<sup>6</sup>, Kelly Y. Li<sup>7</sup>, Chuiguo Huang<sup>1</sup>, Gechang Yu<sup>1</sup>

<sup>1</sup> Department of Medicine and Therapeutics, The Chinese University of Hong Kong, Hong Kong

<sup>2</sup> Hong Kong Institute of Diabetes and Obesity, The Chinese University of Hong Kong, Hong Kong

<sup>3</sup> Li Ka Shing Institute of Health Sciences, The Chinese University of Hong Kong, Hong Kong

<sup>4</sup> Integrated Bioinformatics Laboratory for Cancer Biology and Metabolic Diseases, The Chinese University of Hong Kong, Hong Kong

<sup>5</sup> School of Biomedical Sciences, The Chinese University of Hong Kong

<sup>6</sup> Department of Electronic and Computer Engineering, The Hong Kong University of Science and Technology, Hong Kong

<sup>7</sup> Department of Computer Science and Engineering, The Chinese University of Hong Kong, Hong Kong

<sup>8</sup> School of Life Sciences, The Chinese University of Hong Kong, Hong Kong

<sup>9</sup> Department of Statistics, The Chinese University of Hong Kong, Hong Kong

## **Hong Kong Diabetes Biobank Study Group Members**

Ronald C.W. Ma<sup>1,2,3,4</sup>, Juliana C.N. Chan<sup>1,2,3,4</sup>, Risa Ozaki<sup>1,2</sup>, Andrea O.Y. Luk<sup>1,2,3,4</sup>, Wing-ye So<sup>1,2</sup>, Ka-fai Lee<sup>5</sup>, Shing-chung Siu<sup>6</sup>, Grace Hui<sup>6</sup>, Chiu-chi Tsang<sup>7</sup>, Kam-piu Lau<sup>8</sup>, Jenny Y.Y. Leung<sup>9</sup>, Man-wo Tsang<sup>10</sup>, Grace Kam<sup>10</sup>, Elaine Cheung<sup>10</sup>, Ip-tim Lau<sup>11</sup>, June K.Y. Li<sup>12</sup>, Vincent T.F. Yeung<sup>13</sup>, Jo Jo Kwan<sup>13</sup>, Samuel Fung<sup>14</sup>, Stanley Lo<sup>15</sup>, Emmy Lau<sup>15</sup>, Yuk-lun Cheng<sup>16</sup>, Stephen K.W. Tsui<sup>17</sup>, Yu Huang<sup>17</sup>, Huiyao Lan<sup>1,3</sup>, Weichuan Yu<sup>18</sup>, Brian Tomlinson<sup>1</sup>, Si Lok<sup>19</sup>, Ting-fung Chan<sup>20</sup>, Kevin Y.L. Yip<sup>21</sup>, Cheuk-chun Szeto<sup>1,3</sup>, Xiaodan Fan<sup>22</sup>, Nelson L.S. Tang<sup>3,23</sup>, Xiaoyu Tian<sup>17</sup>, Claudia H.T. Tam<sup>1,2,4</sup>, Guozhi Jiang<sup>1,2,4</sup>, Shi Mai<sup>17</sup>, Baoqi Fan<sup>1,2,4</sup>, Fei Xie<sup>1</sup>, Sen Zhang<sup>18</sup>, Pu Yu<sup>18</sup>, Meng Wang<sup>18</sup>, Heung-man Lee<sup>1</sup>, Cadmon K.P. Lim<sup>1,2,4</sup>, Fangying Xie<sup>1</sup>, Alex C.W. Ng<sup>1</sup>, Grace P.Y. Cheung<sup>1</sup>, Alice P.S. Kong<sup>1,2</sup>, Elaine Y.K. Chow<sup>1,2</sup>, Ming-wai Yeung<sup>1</sup>, Chun-chung Chow<sup>1</sup>, Kitty K.T. Cheung<sup>1</sup>, Rebecca Y.M. Wong<sup>1</sup>, Hon-cheong So<sup>17</sup>, Katie K.H. Chan<sup>1,2</sup>, Chin-san Law<sup>11</sup>, Anthea K.Y. Lock<sup>11</sup>, Ingrid K.Y. Tsang<sup>11</sup>, Susanna C.P. Chan<sup>11</sup>, Yin-wah Chan<sup>11</sup>, Cherry Chiu<sup>2</sup>, Chi-sang Hung<sup>10</sup>, Cheuk-wah Ho<sup>10</sup>, Ivy H.Y. Ng<sup>10</sup>, Maria W.H. Mak<sup>7</sup>, Kai-man Lee<sup>7</sup>, Candy H.S. Leung<sup>13</sup>, Ka-wah Lee<sup>12</sup>, Hui-ming Chan<sup>12</sup>, Winnie Wat<sup>15</sup>, Tracy Lau<sup>15</sup>, Cheuk-yiu Law<sup>14</sup>, Ryan H.Y. Chan<sup>14</sup>, Candice Lau<sup>1</sup>, Pearl Tsang<sup>1</sup>, Vince Chan<sup>1</sup>, Lap-ying Ho<sup>1</sup>, Eva Wong<sup>1</sup>, Josephine Chan<sup>1</sup>, Sau-fung Lam<sup>1</sup>, Jessy Pang<sup>1</sup>, Yee-mui Lee<sup>1</sup>

<sup>1</sup> Department of Medicine and Therapeutics, The Chinese University of Hong Kong, Hong Kong

<sup>2</sup> Hong Kong Institute of Diabetes and Obesity, The Chinese University of Hong Kong, Hong Kong

<sup>3</sup> Li Ka Shing Institute of Health Sciences, The Chinese University of Hong Kong, Hong Kong

<sup>4</sup> Chinese University of Hong Kong-Shanghai Jiao Tong University Joint Research Centre in Diabetes Genomics and Precision Medicine

<sup>5</sup> Department of Medicine and Geriatrics, Kwong Wah Hospital, Hong Kong

- <sup>6</sup> Diabetes Centre, Tung Wah Eastern Hospital, Hong Kong
- <sup>7</sup> Diabetes and Education Centre, Alice Ho Miu Ling Nethersole Hospital, Hong Kong
- <sup>8</sup> North District Hospital, Hong Kong
- <sup>9</sup> Department of Medicine and Geriatrics, Ruttonjee Hospital, Hong Kong
- <sup>10</sup> Department of Medicine and Geriatrics, United Christian Hospital, Hong Kong
- <sup>11</sup> Tseung Kwan O Hospital, Hong Kong
- <sup>12</sup> Department of Medicine, Yan Chai Hospital, Hong Kong
- <sup>13</sup> Centre for Diabetes Education and Management, Our Lady of Maryknoll Hospital, Hong Kong
- <sup>14</sup> Department of Medicine and Geriatrics, Princess Margaret Hospital, Hong Kong
- <sup>15</sup> Department of Medicine, Pamela Youde Nethersole Eastern Hospital, Hong Kong
- <sup>16</sup> Department of Medicine, Alice Ho Miu Ling Nethersole Hospital, Hong Kong
- <sup>17</sup> School of Biomedical Sciences, The Chinese University of Hong Kong
- <sup>18</sup> Department of Electronic and Computer Engineering, Hong Kong University of Science and Technology, Hong Kong
- <sup>19</sup> The Centre for Applied Genomics, The Hospital for Sick Children, Toronto, Canada
- <sup>20</sup> School of Life Sciences, The Chinese University of Hong Kong, Hong Kong
- <sup>21</sup> Department of Computer Science and Engineering, The Chinese University of Hong Kong, Hong Kong
- <sup>22</sup> Department of Statistics, The Chinese University of Hong Kong, Hong Kong
- <sup>23</sup> Department of Chemical Pathology, The Chinese University of Hong Kong, Hong Kong

## **Cohort descriptions**

### *The Hong Kong Diabetes Register (HKDR) Study*

The HKDR baseline study ran from 1995 to 2014 and consists of >10,000 patients with diabetes (1; 2). It was established as a quality improvement program and the study of outcomes for Chinese patients with diabetes at the Prince of Wales Hospital in Hong Kong, serving a population of over 1.2 million. These patients were referred from hospital-based specialty clinics, community clinics, and general practitioners. The Register consecutively enrolled patients with diabetes who were referred to the Diabetes Mellitus and Endocrine Centre for comprehensive assessment of diabetic complications and metabolic control. Type 2 Diabetes (T2D) was diagnosed according to the 1998 World Health Organization (WHO) criteria. Type 1 diabetic patients with acute ketotic presentation, or patients with non-Chinese or unknown nationality, or missing data on the type of diabetes, or continuous requirement of insulin within one year of diagnosis were excluded. In addition to detailed collection of clinical information and comprehensive assessment of diabetes complications at baseline according to the EURODIAB protocol, participants attended regular repeat diabetes complication assessment. Additional information on hospitalization, new diagnoses, prescription, and biochemical investigations are also available and captured. All participants provided written informed consent at the time of enrolment. Ethical approval was obtained from the Clinical Research Ethics Committee of the Chinese University of Hong Kong.

### *The Hong Kong Diabetes Biobank (HKDB) Phase 1 and 2 Studies*

The HKDB is a multicenter prospective cohort study coordinated by the Prince of Wales Hospital, initiated in 2014 (3). It was established as a multicentre diabetes registry and biobank for identification of novel biomarkers of diabetes and related complications. The HKDB recruited participants through 11 diabetes centres and three renal units at major public

hospitals across Hong Kong. Participants attending a scheduled and standardized diabetes complication assessment based on the modified European DIABCARE protocol (4) were invited to take part in the study. Similar enrolment and assessment methods were used as in HKDR, incorporating comprehensive and structured assessment of clinical and biochemical risk factors, as well as diabetes complications (2). When enrolled, the participant is followed until death. More than 20,000 Chinese patients with T2D were enrolled consecutively from 2014 to 2019. DNA samples of 7,335 (phase 1 study) and 6,715 (phase 2 study) patients from the HKDB study were genotyped in two different phases using different genotyping platforms. Participants from the HKDB study overlapped in the HKDR study were excluded from the analysis. Written informed consent was obtained on collection of clinical data and biological samples for research at the time of enrolment. Approvals were obtained from the Joint Chinese University of Hong Kong–New Territories East Cluster Clinical Research Ethics Committee and the clinical research ethics committee of each participating hospital.

#### *The Fenofibrate Intervention and Event Lowering in Diabetes (FIELD) Study*

The FIELD Study is a long-term, double-blind, placebo-controlled trial of fibrate therapy in diabetes conducted in 63 clinical centres in Australia, Finland and New Zealand (5). Patients with T2D and aged 50 - 75 years were randomly allocated between February, 1998, and November, 2000, to once-daily micronised fenofibrate 200 mg (Laboratoires Fournier, Dijon, France) or matching placebo capsules to assess benefits of treatment on the occurrence of coronary and other vascular events. Patients were recruited from hospital clinics and community-based sources. Those who had total-cholesterol (TC) concentration 3.0 – 6.5 mmol/L, plus either a TC/HDL-cholesterol ratio  $\geq 4.0$  or a triglyceride (TG) concentration 1.0 – 5.0 mmol/L, with no clear indication for, or treatment with, lipid-modifying therapy at study entry, were eligible. Exclusion criteria included renal impairment (blood creatinine >130

μmol/L), known chronic liver disease or symptomatic gallbladder disease, and a cardiovascular event within the 3 months before recruitment. Among 5,040 patients with T2D included in the *in-silico* replication study, a total of 764 patients (15.2%) progressed to CHD during the study period. All patients provided written informed consent. The study protocol was approved by local and national ethics committees and was undertaken in accordance with the Declaration of Helsinki and Good Clinical Practice Guidelines.

*The Biobank Japan (BBJ) Study reported by Ishigaki et al. (6) and Koyama et al. (7)*

The BBJ Project is one of the largest non-European single-descent biobanks with detailed phenotypes (8). Details of the study design of the BBJ Project have been previously described (8). Briefly, this project is a multi-institutional hospital-based registry that collected DNA, serum, and clinical information of approximately 200,000 patients from 66 hospitals affiliated with 12 medical institutes between fiscal years 2003 and 2007. All study participants had been diagnosed with one or more of the 47 target diseases by physicians at the cooperating hospitals as described in the previous reports (8).

*The Japanese GWAS reported by Matsunaga et al.*

This study performed a meta-analysis of two Japanese genome-wide association studies (GWASs) using independent case-control cohorts (9). All samples were from patients of Japanese ancestry. In the first GWAS, the cases of MI were selected from BBJ (8) and the controls were obtained from Tohoku Medical Megabank Organization (ToMMo), Iwate Tohoku Medical Megabank Organization (IMM) (10), the Japan Public Health Center-based Prospective (JPHC) Study (11), and the Japan Multi-Institutional Collaborative Cohort (JMICC) Study (12). In the second GWAS, the cases were selected from the Osaka Acute Coronary Insufficiency Study (OACIS) (13), and the controls were obtained from BBJ, for

those with MI, unstable angina pectoris, stable angina pectoris, cerebral infarction, or peripheral arterial disease were excluded from the analysis (8). Informed consent was obtained from all participants by following the protocols approved by their institutional ethical committees before enrollment, and the Institutional Review Board (IRB) approved this study.

*The meta-analysis of CARDIoGRAMplusC4D and UK Biobank data reported by van der Harst et al. (14)*

The CARDIoGRAMplusC4D consortium represents a collaborative effort to combine data from multiple large-scale genetic studies to identify risk loci for coronary artery disease and myocardial infarction. The detailed methods have been described elsewhere (15).

The UK Biobank enrolled the individuals aged 40-69 years and registered with a general practitioner of the UK National Health Service (NHS). A total of 503,325 individuals were included between 2006–2010. All study participants provided informed consent and the approval was obtained by the North West Multicentre Research Ethics Committee. Detailed methods used by UK Biobank have been described elsewhere (16).

*The FinnGEN Project*

The FinnGEN Project launched in 2017, is a study that combines genome information with digital health care data, based on a public-private partnership between Finnish universities, biobanks, hospital districts, and several international pharmaceutical companies (17). It aims to collect biological samples from 500,000 participants in Finland over six years with the aim of improving human health through genetic research, and ultimately identify new therapeutic targets and diagnostics for treating numerous diseases. The collected samples consist of two entities: 1) legacy samples (prospected number ~200,000), mainly collected by the THL

(National Institute for Health and Welfare); and 2) ~300 000 prospective samples which will mainly be collected by hospital biobanks.

*The Joint T2D-CHD GWAS reported by Zhao et al.*

The Joint T2D-CHD GWAS is a genome-wide, multi-ancestry study of genetic variation for both T2D and CHD in up to 265,678 subjects for T2D and 260,365 subjects for CHD (18). A meta-analysis was performed on data from eight different studies with 48,437 individuals (13,525 T2D cases and 34,912 controls); four studies (PROMIS, RACE, BRAVE, and EPIDREAM) included participants of South Asian origin (n = 28,139; 9,654 T2D cases and 18,485 controls) and four studies (FINRISK, MedStar, MDC, and PennCATH) included subjects of European origin (n = 20,298; 3,871 T2D cases and 16,427 controls). This study further used published data from the DIAGRAM Consortium and conducted combined discovery analysis on 198,258 participants (48,365 T2D cases and 149,893 controls).

*The MEGASTROKE Consortium*

This consortium performed a multi-ancestry GWAS of 520,000 subjects and identified 32 loci associated with stroke and stroke subtypes. The descriptions for individual cohorts are available in previous reports (19).

*The SUMMIT Consortium*

This consortium conducted a meta-analysis of multiple GWASs for diabetic kidney disease in up to 40,340 subjects with diabetes. Meta-analyses were performed separated in subjects with T1D and T2D, and were then combined yielding 38 meta-analyses in total. The individual cohorts have been described elsewhere (20; 21).



### *The CKDGen Consortium*

The CKDGen Consortium is an international collaborative effort dedicated to the investigation of the genetic underpinnings of kidney function in health and disease (22). This consortium includes studies with individuals of European, East and South Asian, African American, and Hispanic ancestry. Recently, it has expanded to study not only DNA sequence variations but also epigenetic modifications that integrate the influence of genetics and environment, through epigenome-wide association studies. The detailed methods used by the CKDGen Consortium have been previously described (22).

## **Supplementary Methods**

### *Genotyping, quality control (QC), and imputation*

In the HKDR, HKDB Phase 1 and 2 Studies, DNA samples were genotyped using one of three arrays: 1) Illumina Omni2.5 + Exome Array, 2) Infinium® Global Screening Array, and 3) Infinium® Asian Screening Array. Samples from the FIELD Study underwent genotyping with the Affymetrix Axiom Array.

We applied the same standard quality control procedures on each genome-wide SNP array data. The per-individual QC of genotype data consists of four steps: 1) sex checking based on the genotype call from chromosomes X and Y; 2) detection of low-quality samples based on call rate and heterozygosity rate; 3) detection of possible familial relationship or duplicated individuals using estimates of identity-by-descent (IBD); 4) detection of population stratification by performing principal component (PC) analysis (Supplementary Figure S5). Only biallelic autosomal SNPs were included in the per-marker QC. SNPs were excluded from further analysis if: 1) Hardy–Weinberg equilibrium (HWE)  $p < 1 \times 10^{-4}$ ; 2) minor allele frequency (MAF)  $< 1\%$ ; or 3) call rate  $< 95\%$ . In particular, SNPs with MAF  $\geq 1\%$  but  $\leq 5\%$  are excluded if their call rate is  $< 99\%$ .

Within each individual cohort, we imputed the genotype data to the 1000 Genomes Project phase III reference panel (October 2014) using the Michigan Imputation Server (23). SNPs with MAF  $< 1\%$ , or imputation quality score  $R_{sq} < 0.5$  were removed. Finally, ~6.6 million SNPs overlapped among the discovery cohorts (i.e. HKDR and HKDB Phase 1 Studies) were included in the meta-analysis of GWASs for CHD.

### *Outcome variables*

In the HKDR, HKDB Phase 1 and 2 Studies, all clinical endpoints were defined based on the discharge principle diagnoses of hospital admissions and mortality until 31<sup>st</sup> December,

2019. We retrieved the data of hospital admissions from the Hong Kong Hospital Authority Central Computer System, which records the admissions to all public hospitals, deaths and causes of death. Hospital discharge principal diagnoses coded by the International Classification of Diseases, Ninth Revision (ICD-9) were used to identify the outcome event. Ascertainment of our primary endpoint CHD was based on a composite of acute myocardial infarction (MI), nonfatal ischemic heart disease, or angina pectoris. The secondary endpoints of this study were MI, stroke (defined as the occurrence of ischemic stroke except transient ischemic attack, hemorrhagic stroke, or acute but ill-defined cerebrovascular disease), peripheral vascular disease (PVD, defined as the occurrence of amputation, gangrene, or peripheral revascularization), cardiovascular disease (CVD, defined as the occurrence of CHD, stroke, or PVD), congestive heart failure (CHF, defined as the occurrence of new or worsening signs and/or symptoms, and initiation or up-titration of oral or intravenous diuretics with appropriate response), chronic kidney disease (CKD, defined as the requirement of chronic dialysis or kidney transplant, or having sustained eGFR  $<60$  ml/min/1.73 m<sup>2</sup> in 90 days apart), and kidney failure (KF, defined as the requirement of chronic dialysis or kidney transplant, or having sustained eGFR  $\leq 15$  ml/min/1.73 m<sup>2</sup> in 90 days apart). In the FIELD study, CHD was defined based on a composite of non-fatal MI, coronary death and revascularization.

In the case-control analysis, patients with a particular endpoint occurred either at baseline or during follow-up were classified as cases for that endpoint. Patients were classified as controls if they had duration of diabetes  $\geq 10$  years, and were free from CVD (CKD) for the analysis of cardiovascular (renal) endpoints. In the prospective analysis, patients with a particular endpoint at enrolment were excluded from the analysis of that endpoint. Follow-up time was calculated as the period from enrolment to the first occurrence of endpoint, the date of death or 31<sup>st</sup> December 2019, whichever came first.

For individuals taking anti-hypertensive medications, 15 mmHg was added to systolic blood pressure (SBP) and 10 mmHg was added to diastolic blood pressure (DBP) in the replication analysis for BP, suggested by previous study (24). Hypertension was defined as BP  $\geq 130/80$  mmHg, or use of angiotensin-converting enzyme inhibitors or angiotensin receptor blockers, or use of other antihypertensive medications (25). According to the American Diabetes Association (ADA) guideline, ABC goals refer to 1) HbA<sub>1c</sub> <7%; 2) BP <130/80 mmHg; 3) and low-density lipoprotein cholesterol (LDL-C) <2.6 mmol/l (26).

#### *Phenome-wide association study (PheWAS)*

To understand the pathways by which the identified locus/loci might be related to cardiovascular diseases, we looked up associations of the sentinel variant(s) with a wide range of risk factors, molecular traits and clinical disorders from 11 data sources, including the available GWAS datasets and the web portals. For this analysis, phenotype associations were queried using the PheWAS database available at the T2D Knowledge Portal (<https://t2d.hugeamp.org/>), the PhenoScanner (27; 28), the GWAS Atlas (29), the GWAS Catalog (<https://www.ebi.ac.uk/gwas/>), the Open Targets Genetics Portal (30), the UKB PheWeb (<https://pheweb.org/UKB-Neale/>), and the FinnGEN PheWeb (<https://r5.finnngen.fi/about>) (17). We additionally queried the published GWAS contributed by the BBJ Project (31; 32), the UKB and ICBP blood pressure GWAS (24), the Heart Rate and Hypertension GWAS (33), and the GIANT UK Biobank GWAS (34). We considered only the phenotypes that were associated with the identified variant(s) at  $P \leq 5 \times 10^{-8}$ , and further tested these associations in the HKDR Study, the HKDB Phase 1 and 2 Studies if the phenotype data were available.

#### *Bioinformatic analyses*

We carried out the cis-expression quantitative trait loci (eQTL) and multi-tissue transcriptome-wide association study (TWAS) analyses to examine underlying biological pathways linking variants to cardiovascular disease. In the eQTL analysis, we determined whether the identified variant(s) influence(s) levels of tissue-specific gene expression, using the data from the Genotype Tissue Expression version 8 (GTEx-v8) Portal (<https://gtexportal.org/home/>). Expression and genotype data of these samples were obtained using the RNA-seq (Illumina TruSeq; Illumina Inc) and whole-genome sequencing, respectively. Only variants with MAF  $\geq 1\%$  and within 1 MB window upstream and downstream of the transcription start site for each gene were included. For each gene and tissue, the effect of genotype on gene expression level was assessed by linear regression. A false discovery rate threshold of  $\leq 0.05$  was applied to identify a significant eQTL. To combine gene expression data across tissues, meta-analysis under a random effects model was implemented in Metasoft (35).

In the multi-tissue TWAS analysis, we tested whether the genetic variants exert effects on CHD risk through regulating tissue-specific expression of causal gene. We adopted a gene-based association approach to investigate the associations between genetically regulated gene expression and CHD risk at loci of interest. This analysis was implemented by the S-PrediXcan function from the MetaXcan toolset (version 0.7.5), leveraging on 1) the meta-analysis association statistics for CHD from our discovery cohorts (the HKDR and HKDB Phase 1 studies) and, 2) the MASHR models of GTEx-v8 release eQTL (36-38). We used the genotype covariance matrices based on the European populations in the 1000 Genomes Project to account for LD structure in the analysis. The tissue-specific associations obtained from S-PrediXcan were then meta-analyzed using MultiXcan. MultiXcan provided the evidence of multi-tissue association by integrating the information across all the tissue types under investigation while accounting for the correlation among them.

### *Statistical analysis*

All analyses were performed using PLINK v1.9 and v2.0 (39), IBM SPSS Statistics 26, and R 3.4.4 (<http://www.r-project.org/>, 31<sup>st</sup> December, 2019) unless specified otherwise. Data are described with percentage (*n*), mean  $\pm$  SD, or median (Q1-Q3). Meta-analysis was implemented by METAL software (40). FUMA was used to annotate, prioritize, and interpret the GWAS results (41). Regional plot around genome-wide locus were visualized using LocusZoom (<http://csg.sph.umich.edu/locuszoom/>). Differences between groups were tested with chi-squared test, Student's T-test, or Mann-Whitney test, as appropriate. *P*-values  $<0.05$  and  $<5.0 \times 10^{-8}$  were considered significant and genome-wide significant, respectively. To qualify as replication, an association was required to have  $P \leq 0.05$  and a consistent direction of effect.

Within cohort, logistic regression and Cox proportional hazards regression were used to examine the associations between genetic variants under an additive genetic model and diabetes cardio-renal complications (e.g. CHD, MI, stroke, PVD, CVD, CHF, CKD and KF), with different covariate adjustments in the case-control and prospective analysis, respectively. Using a cross-sectional study design, associations of genetic variants with baseline binary (e.g. status of hypertension) and quantitative traits (e.g. SBP, DBP and body height) were tested respectively by logistic and linear regression adjusted for sex, age, duration of diabetes and PCs in each cohort. Odds ratios (OR) or hazard ratios (HR) with their 95% confidence intervals (CI), or  $\beta \pm$  SE were calculated in these analyses. Results from individual cohorts were combined by inverse-variance weighted meta-analysis using a fixed effects model. Cochran's Q-test was used to assess the heterogeneity of effect between studies. We accounted for potential population stratification and relatedness of the individuals by adjustment for PCs in all association analysis and subsequent genomic control correction in GWAS analysis.

To test for the gene-(ABC achievement) interaction effects on new-onset diabetes cardiovascular endpoints (i.e. CHD and MI), we performed Cox regression based on the model including two main effects (i.e. the achievement of each ABC target at baseline ('yes' [coded as 1] vs. 'no' [coded as 0]), and the lead SNP), the interaction (product) term of main effects and covariates in a combined cohort of Chinese patients with T2D (HKDR Study, HKDB Phase 1 and 2 Studies). For each significant interaction effect, a subgroup analysis was performed by Cox regression to examine the association between the goal attainment and endpoint, stratified by different genotypes. In both interaction and subgroup analyses, we adjusted for study cohorts (i.e. HKDR Study, HKDB Phase 1 and 2 Studies), enrolment year, sex, age, duration of diabetes, and PCs.

## **Supplementary results**

### *Biological insight of the newly identified variant rs10171703*

We looked up our genome-wide significant locus using the GTEx-v8 expression eQTL data in 47 tissues ( $n = 73 - 706$ ). The major C-allele of the lead variant rs10171703 was significantly associated with increased expression of the *PDE1A* gene in both subcutaneous adipose ( $n = 581$ ;  $NES \pm SE = 0.110 \pm 0.028$ ;  $P = 1.1 \times 10^{-4}$ ) and sun exposed skin tissues ( $n = 605$ ;  $NES \pm SE = 0.091 \pm 0.025$ ;  $P = 2.0 \times 10^{-4}$ ), after considering false discovery rate (Supplementary Figures S2 and S3). The variant rs10171703 moderately correlated (was in partial LD) with the peak eQTL SNP (i.e. rs4091077) at *PDE1A* gene in subcutaneous adipose tissue ( $r^2 = 0.511$ ) but did not correlate with (independent of) the eQTL peak (i.e. rs934260) in the sun exposed skin tissue ( $r^2 = 0.021$ ) (Supplementary Table S12). Meta-analysis of all the 47 tissues available in GTEx-v8 yielded a  $p$ -value of  $2.6 \times 10^{-11}$  for association between rs10171703 and *PDE1A* expression under a random effects model (Supplementary Figures S2).

We further performed multi-tissue TWAS analysis to test whether the genetic variants exert effects on CHD risk through regulating tissue-specific expression of causal gene. Using our meta-analysis summary statistics within the *PDE1A* region and the GTEx-v8 eQTL data in S-PrediXcan, *PDE1A* showed genetically-mediated differential expression in the tissues of thyroid ( $P = 8.0 \times 10^{-3}$ ) and muscularis of esophagus ( $P = 0.019$ ) (Supplementary Table S13). However, such observation was not seen in the subcutaneous adipose ( $P = 0.807$ ) and sun exposed skin ( $P = 0.957$ ) tissues (Supplementary Table 13).



## References:

1. Jiang G, Luk AOY, Tam CHT, Xie F, Carstensen B, Lau ESH, Lim CKP, Lee HM, Ng ACW, Ng MCY, Ozaki R, Kong APS, Chow CC, Yang X, Lan HY, Tsui SKW, Fan X, Szeto CC, So WY, Chan JCN, Ma RCW, Hong Kong Diabetes Register TRSSG. Progression of diabetic kidney disease and trajectory of kidney function decline in Chinese patients with Type 2 diabetes. *Kidney Int* 2019;95:178-187
2. Yang XL, So WY, Kong AP, Clarke P, Ho CS, Lam CW, Ng MH, Lyu RR, Yin DD, Chow CC, Cockram CS, Tong PC, Chan JC. End-stage renal disease risk equations for Hong Kong Chinese patients with type 2 diabetes: Hong Kong Diabetes Registry. *Diabetologia* 2006;49:2299-2308
3. Tam CHT, Lim CKP, Luk AOY, Ng ACW, Lee HM, Jiang G, Lau ESH, Fan B, Wan R, Kong APS, Tam WH, Ozaki R, Chow EYK, Lee KF, Siu SC, Hui G, Tsang CC, Lau KP, Leung JYY, Tsang MW, Kam G, Lau IT, Li JKY, Yeung VTF, Lau E, Lo S, Fung S, Cheng YL, Chow CC, Hu M, Yu W, Tsui SKW, Huang Y, Lan H, Szeto CC, Tang NLS, Ng MCY, So WY, Tomlinson B, Chan JCN, Ma RCW, Hong Kong Diabetes Register TRSSG, Hong Kong Diabetes Biobank Study G. Development of genome-wide polygenic risk scores for lipid traits and clinical applications for dyslipidemia, subclinical atherosclerosis, and diabetes cardiovascular complications among East Asians. *Genome Med* 2021;13:29
4. Piwernetz K, Home PD, Snorgaard O, Antsiferov M, Staehr-Johansen K, Krans M. Monitoring the targets of the St Vincent Declaration and the implementation of quality management in diabetes care: the DIABCARE initiative. The DIABCARE Monitoring Group of the St Vincent Declaration Steering Committee. *Diabet Med* 1993;10:371-377
5. Investigators FS. The need for a large-scale trial of fibrate therapy in diabetes: the rationale and design of the Fenofibrate Intervention and Event Lowering in Diabetes (FIELD) study. [ISRCTN64783481]. *Cardiovasc Diabetol* 2004;3:9
6. Ishigaki K, Akiyama M, Kanai M, Takahashi A, Kawakami E, Sugishita H, Sakaue S, Matoba N, Low SK, Okada Y, Terao C, Amariuta T, Gazal S, Kochi Y, Horikoshi M, Suzuki K, Ito K, Koyama S, Ozaki K, Niida S, Sakata Y, Sakata Y, Kohno T, Shiraishi K, Momozawa Y, Hirata M, Matsuda K, Ikeda M, Iwata N, Ikegawa S, Kou I, Tanaka T, Nakagawa H, Suzuki A, Hirota T, Tamari M, Chayama K, Miki D, Mori M, Nagayama S, Daigo Y, Miki Y, Katagiri T, Ogawa O, Obara W, Ito H, Yoshida T, Imoto I, Takahashi T, Tanikawa C, Suzuki T, Sinozaki N, Minami S, Yamaguchi H, Asai S, Takahashi Y, Yamaji K, Takahashi K, Fujioka T, Takata R, Yanai H, Masumoto A, Koretsune Y, Kutsumi H, Higashiyama M, Murayama S, Minegishi N, Suzuki K, Tanno K, Shimizu A, Yamaji T, Iwasaki M, Sawada N, Uemura H, Tanaka K, Naito M, Sasaki M, Wakai K, Tsugane S, Yamamoto M, Yamamoto K, Murakami Y, Nakamura Y, Raychaudhuri S, Inazawa J, Yamauchi T, Kadowaki T, Kubo M, Kamatani Y. Large-scale genome-wide association study in a Japanese population identifies novel susceptibility loci across different diseases. *Nat Genet* 2020;52:669-679
7. Koyama S, Ito K, Terao C, Akiyama M, Horikoshi M, Momozawa Y, Matsunaga H, Ieki H, Ozaki K, Onouchi Y, Takahashi A, Nomura S, Morita H, Akazawa H, Kim C, Seo JS, Higasa K, Iwasaki M, Yamaji T, Sawada N, Tsugane S, Koyama T, Ikezaki H, Takashima N, Tanaka K, Arisawa K, Kuriki K, Naito M, Wakai K, Suna S, Sakata Y, Sato H, Hori M, Sakata Y, Matsuda K, Murakami Y, Aburatani H, Kubo M, Matsuda F, Kamatani Y, Komuro I. Population-specific and trans-ancestry genome-wide analyses identify distinct and shared genetic risk loci for coronary artery disease. *Nat Genet* 2020;52:1169-1177
8. Nagai A, Hirata M, Kamatani Y, Muto K, Matsuda K, Kiyohara Y, Ninomiya T, Tamakoshi A, Yamagata Z, Mushiroda T, Murakami Y, Yuji K, Furukawa Y, Zembutsu H, Tanaka T, Ohnishi Y, Nakamura Y, BioBank Japan Cooperative Hospital G, Kubo M. Overview of the BioBank Japan Project: Study design and profile. *J Epidemiol* 2017;27:S2-S8

9. Matsunaga H, Ito K, Akiyama M, Takahashi A, Koyama S, Nomura S, Ieki H, Ozaki K, Onouchi Y, Sakaue S, Suna S, Ogishima S, Yamamoto M, Hozawa A, Satoh M, Sasaki M, Yamaji T, Sawada N, Iwasaki M, Tsugane S, Tanaka K, Arisawa K, Ikezaki H, Takashima N, Naito M, Wakai K, Tanaka H, Sakata Y, Morita H, Sakata Y, Matsuda K, Murakami Y, Akazawa H, Kubo M, Kamatani Y, Komuro I. Transethnic Meta-Analysis of Genome-Wide Association Studies Identifies Three New Loci and Characterizes Population-Specific Differences for Coronary Artery Disease. *Circ Genom Precis Med* 2020;13:e002670
10. Kuriyama S, Yaegashi N, Nagami F, Arai T, Kawaguchi Y, Osumi N, Sakaida M, Suzuki Y, Nakayama K, Hashizume H, Tamiya G, Kawame H, Suzuki K, Hozawa A, Nakaya N, Kikuya M, Metoki H, Tsuji I, Fuse N, Kiyomoto H, Sugawara J, Tsuboi A, Egawa S, Ito K, Chida K, Ishii T, Tomita H, Taki Y, Minegishi N, Ishii N, Yasuda J, Igarashi K, Shimizu R, Nagasaki M, Koshihara S, Kinoshita K, Ogishima S, Takai-Igarashi T, Tominaga T, Tanabe O, Ohuchi N, Shimosegawa T, Kure S, Tanaka H, Ito S, Hitomi J, Tanno K, Nakamura M, Ogasawara K, Kobayashi S, Sakata K, Satoh M, Shimizu A, Sasaki M, Endo R, Sobue K, Tohoku Medical Megabank Project Study Group T, Yamamoto M. The Tohoku Medical Megabank Project: Design and Mission. *J Epidemiol* 2016;26:493-511
11. Tsugane S, Sawada N. The JPHC Study: Design and Some Findings on the Typical Japanese Diet. *Jpn J Clin Oncol* 2014;44:777-782
12. Hamajima N, Group JMS. The Japan Multi-Institutional Collaborative Cohort Study (J-MICC Study) to detect gene-environment interactions for cancer. *Asian Pac J Cancer Prev* 2007;8:317-323
13. Mizuno H, Sato H, Sakata Y, Ohnishi Y, Hishida E, Kinjo K, Nakatani D, Shimizu M, Kondo H, Tanaka T, Ozaki K, Hirayama A, Ito H, Otsu K, Hori M, Osaka Acute Coronary Insufficiency Study G. Impact of atherosclerosis-related gene polymorphisms on mortality and recurrent events after myocardial infarction. *Atherosclerosis* 2006;185:400-405
14. van der Harst P, Verweij N. Identification of 64 Novel Genetic Loci Provides an Expanded View on the Genetic Architecture of Coronary Artery Disease. *Circ Res* 2018;122:433-443
15. Consortium CAD, Deloukas P, Kanoni S, Willenborg C, Farrall M, Assimes TL, Thompson JR, Ingelsson E, Saleheen D, Erdmann J, Goldstein BA, Stirrups K, Konig IR, Cazier JB, Johansson A, Hall AS, Lee JY, Willer CJ, Chambers JC, Esko T, Folkersen L, Goel A, Grundberg E, Havulinna AS, Ho WK, Hopewell JC, Eriksson N, Kleber ME, Kristiansson K, Lundmark P, Lyytikainen LP, Rafelt S, Shungin D, Strawbridge RJ, Thorleifsson G, Tikkanen E, Van Zuydam N, Voight BF, Waite LL, Zhang W, Ziegler A, Absher D, Altshuler D, Balmforth AJ, Barroso I, Braund PS, Burgdorf C, Claudi-Boehm S, Cox D, Dimitriou M, Do R, Consortium D, Consortium C, Doney AS, El Mokhtari N, Eriksson P, Fischer K, Fontanillas P, Franco-Cereceda A, Gigante B, Groop L, Gustafsson S, Hager J, Hallmans G, Han BG, Hunt SE, Kang HM, Illig T, Kessler T, Knowles JW, Kolovou G, Kuusisto J, Langenberg C, Langford C, Leander K, Lokki ML, Lundmark A, McCarthy MI, Meisinger C, Melander O, Mihailov E, Maouche S, Morris AD, Muller-Nurasyid M, Mu TC, Nikus K, Peden JF, Rayner NW, Rasheed A, Rosinger S, Rubin D, Rumpf MP, Schafer A, Sivananthan M, Song C, Stewart AF, Tan ST, Thorgeirsson G, van der Schoot CE, Wagner PJ, Wellcome Trust Case Control C, Wells GA, Wild PS, Yang TP, Amouyel P, Arveiler D, Basart H, Boehnke M, Boerwinkle E, Brambilla P, Cambien F, Cupples AL, de Faire U, Dehghan A, Diemert P, Epstein SE, Evans A, Ferrario MM, Ferrieres J, Gauguier D, Go AS, Goodall AH, Gudnason V, Hazen SL, Holm H, Iribarren C, Jang Y, Kahonen M, Kee F, Kim HS, Klopp N, Koenig W, Kratzer W, Kuulasmaa K, Laakso M, Laaksonen R, Lee JY, Lind L, Ouwehand WH, Parish S, Park JE, Pedersen NL, Peters A, Quertermous T, Rader DJ, Salomaa V, Schadt E, Shah SH, Sinisalo J, Stark K, Stefansson K, Tregouet DA, Virtamo J, Wallentin L, Wareham N, Zimmermann ME, Nieminen MS, Hengstenberg C, Sandhu MS, Pastinen T, Syvanen AC, Hovingh GK, Dedoussis G, Franks PW, Lehtimäki T, Metspalu A, Zalloua PA, Siegbahn A, Schreiber S,

Ripatti S, Blankenberg SS, Perola M, Clarke R, Boehm BO, O'Donnell C, Reilly MP, Marz W, Collins R, Kathiresan S, Hamsten A, Kooner JS, Thorsteinsdottir U, Danesh J, Palmer CN, Roberts R, Watkins H, Schunkert H, Samani NJ. Large-scale association analysis identifies new risk loci for coronary artery disease. *Nat Genet* 2013;45:25-33

16. Sudlow C, Gallacher J, Allen N, Beral V, Burton P, Danesh J, Downey P, Elliott P, Green J, Landray M, Liu B, Matthews P, Ong G, Pell J, Silman A, Young A, Sprosen T, Peakman T, Collins R. UK biobank: an open access resource for identifying the causes of a wide range of complex diseases of middle and old age. *PLoS Med* 2015;12:e1001779

17. Kurki MI, Karjalainen J, Palta P, Sipilä TP, Kristiansson K, Donner K, Reeve MP, Laivuori H, Aavikko M, Kaunisto MA, Loukola A, Lahtela E, Mattsson H, Laiho P, Della Briotta Parolo P, Lehisto A, Kanai M, Mars N, Rämö J, Kiiskinen T, Heyne HO, Veerapen K, Rüeger S, Lemmelä S, Zhou W, Ruotsalainen S, Pärn K, Hiekkalinna T, Koskelainen S, Pajajärvi T, Llorens V, Gracia-Tabuenca J, Siirtola H, Reis K, Elnahas AG, Aalto-Setälä K, Alasoo K, Arvas M, Auro K, Biswas S, Bizaki-Vallaskangas A, Carpen O, Chen C-Y, Dada OA, Ding Z, Ehm MG, Eklund K, Färkkilä M, Finucane H, Ganna A, Ghazal A, Graham RR, Green E, Hakonen A, Hautalahti M, Hedman Å, Hiltunen M, Hinttala R, Hovatta I, Hu X, Huertas-Vazquez A, Huilaja L, Hunkapiller J, Jacob H, Jensen J-N, Joensuu H, John S, Julkunen V, Jung M, Junttila J, Kaarniranta K, Kähönen M, Kajane RM, Kallio L, Kälviäinen R, Kaprio J, Kerimov N, Kettunen J, Kilpeläinen E, Kilpi T, Klinger K, Kosma V-M, Kuopio T, Kurra V, Laisk T, Laukkanen J, Lawless N, Liu A, Longerich S, Mägi R, Mäkelä J, Mäkitie A, Malarstig A, Mannermaa A, Maranville J, Matakidou A, Meretoja T, Mozaffari SV, Niemi ME, Niemi M, Niiranen T, O'Donnell CJ, Obeidat Me, Okafo G, Ollila HM, Palomäki A, Palotie T, Partanen J, Paul DS, Pelkonen M, Pendergrass RK, Petrovski S, Pitkäranta A, Platt A, Pulford D, Punkka E, Pussinen P, Raghavan N, Rahimov F, Rajpal D, Renaud NA, Riley-Gillis B, Rodosthenous R, Saarentaus E, Salminen A, Salminen E, Salomaa V, Schleutker J, Serpi R, Shen H-y, Siegel R, Silander K, Siltanen S, Soini S, Soininen H, Sul JH, Tachmazidou I, Tasanen K, Tienari P, Toppila-Salmi S, Tukiainen T, Tuomi T, Turunen JA, Ulirsch JC, Vaura F, Virolainen P, Waring J, Waterworth D, Yang R, Nelis M, Reigo A, Metspalu A, Milani L, Esko T, Fox C, Havulinna AS, Perola M, Ripatti S, Jalanko A, Laitinen T, Mäkelä T, Plenge R, McCarthy M, Runz H, Daly MJ, Palotie A. FinnGen: Unique genetic insights from combining isolated population and national health register data. *medRxiv* 2022:2022.2003.2003.22271360

18. Zhao W, Rasheed A, Tikkanen E, Lee JJ, Butterworth AS, Howson JMM, Assimes TL, Chowdhury R, Orho-Melander M, Damrauer S, Small A, Asma S, Imamura M, Yamauchi T, Chambers JC, Chen P, Sapkota BR, Shah N, Jabeen S, Surendran P, Lu Y, Zhang W, Imran A, Abbas S, Majeed F, Trindade K, Qamar N, Mallick NH, Yaqoob Z, Saghir T, Rizvi SNH, Memon A, Rasheed SZ, Memon FU, Mehmood K, Ahmed N, Qureshi IH, Tanveer Us S, Iqbal W, Malik U, Mehra N, Kuo JZ, Sheu WH, Guo X, Hsiung CA, Juang JJ, Taylor KD, Hung YJ, Lee WJ, Quertermous T, Lee IT, Hsu CC, Bottinger EP, Ralhan S, Teo YY, Wang TD, Alam DS, Di Angelantonio E, Epstein S, Nielsen SF, Nordestgaard BG, Tybjaerg-Hansen A, Young R, Consortium CHDE, Benn M, Frikke-Schmidt R, Kamstrup PR, Consortium E-C, Consortium EP-I, Michigan B, Jukema JW, Sattar N, Smit R, Chung RH, Liang KW, Anand S, Sanghera DK, Ripatti S, Loos RJF, Kooner JS, Tai ES, Rotter JJ, Chen YI, Frossard P, Maeda S, Kadowaki T, Reilly M, Pare G, Melander O, Salomaa V, Rader DJ, Danesh J, Voight BF, Saleheen D. Identification of new susceptibility loci for type 2 diabetes and shared etiological pathways with coronary heart disease. *Nat Genet* 2017;49:1450-1457

19. Malik R, Chauhan G, Traylor M, Sargurupremraj M, Okada Y, Mishra A, Rutten-Jacobs L, Giese AK, van der Laan SW, Gretarsdottir S, Anderson CD, Chong M, Adams HHH, Ago T, Almgren P, Amouyel P, Ay H, Bartz TM, Benavente OR, Bevan S, Boncoraglio GB, Brown RD, Jr., Butterworth AS, Carrera C, Carty CL, Chasman DI, Chen WM, Cole JW, Correa A,

Cotlarciuc I, Cruchaga C, Danesh J, de Bakker PIW, DeStefano AL, den Hoed M, Duan Q, Engelter ST, Falcone GJ, Gottesman RF, Grewal RP, Gudnason V, Gustafsson S, Haessler J, Harris TB, Hassan A, Havulinna AS, Heckbert SR, Holliday EG, Howard G, Hsu FC, Hyacinth HI, Ikram MA, Ingelsson E, Irvin MR, Jian X, Jimenez-Conde J, Johnson JA, Jukema JW, Kanai M, Keene KL, Kissela BM, Kleindorfer DO, Kooperberg C, Kubo M, Lange LA, Langefeld CD, Langenberg C, Launer LJ, Lee JM, Lemmens R, Leys D, Lewis CM, Lin WY, Lindgren AG, Lorentzen E, Magnusson PK, Maguire J, Manichaikul A, McArdle PF, Meschia JF, Mitchell BD, Mosley TH, Nalls MA, Ninomiya T, O'Donnell MJ, Psaty BM, Pulit SL, Rannikmae K, Reiner AP, Rexrode KM, Rice K, Rich SS, Ridker PM, Rost NS, Rothwell PM, Rotter JI, Rundek T, Sacco RL, Sakaue S, Sale MM, Salomaa V, Sapkota BR, Schmidt R, Schmidt CO, Schminke U, Sharma P, Slowik A, Sudlow CLM, Tanislav C, Tatlisumak T, Taylor KD, Thijs VNS, Thorleifsson G, Thorsteinsdottir U, Tiedt S, Trompet S, Tzourio C, van Duijn CM, Walters M, Wareham NJ, Wassertheil-Smoller S, Wilson JG, Wiggins KL, Yang Q, Yusuf S, Consortium AF, Cohorts for H, Aging Research in Genomic Epidemiology C, International Genomics of Blood Pressure C, Consortium I, Starnet, Bis JC, Pastinen T, Ruusalepp A, Schadt EE, Koplev S, Bjorkegren JLM, Codoni V, Civelek M, Smith NL, Tregouet DA, Christophersen IE, Roselli C, Lubitz SA, Ellinor PT, Tai ES, Kooner JS, Kato N, He J, van der Harst P, Elliott P, Chambers JC, Takeuchi F, Johnson AD, BioBank Japan Cooperative Hospital G, Consortium C, Consortium E-C, Consortium EP-I, International Stroke Genetics C, Consortium M, Neurology Working Group of the CC, Network NSG, Study UKYLD, Consortium M, Sanghera DK, Melander O, Jern C, Strbian D, Fernandez-Cadenas I, Longstreth WT, Jr., Rolfs A, Hata J, Woo D, Rosand J, Pare G, Hopewell JC, Saleheen D, Stefansson K, Worrall BB, Kittner SJ, Seshadri S, Fornage M, Markus HS, Howson JMM, Kamatani Y, DeBette S, Dichgans M. Multi-ancestry genome-wide association study of 520,000 subjects identifies 32 loci associated with stroke and stroke subtypes. *Nat Genet* 2018;50:524-537

20. Sandholm N, Van Zuydam N, Ahlqvist E, Juliusdottir T, Deshmukh HA, Rayner NW, Di Camillo B, Forsblom C, Fadista J, Ziemek D, Salem RM, Hiraki LT, Pezzolesi M, Tregouet D, Dahlstrom E, Valo E, Oskolkov N, Ladenvall C, Marcovecchio ML, Cooper J, Sambo F, Malovini A, Manfrini M, McKnight AJ, Lajer M, Harjutsalo V, Gordin D, Parkkonen M, The FinnDiane Study G, Tuomilehto J, Lyssenko V, McKeigue PM, Rich SS, Brosnan MJ, Fauman E, Bellazzi R, Rossing P, Hadjadj S, Krolewski A, Paterson AD, The DESG, Florez JC, Hirschhorn JN, Maxwell AP, Consortium G, Dunger D, Cobelli C, Colhoun HM, Groop L, McCarthy MI, Groop PH, Consortium S. The Genetic Landscape of Renal Complications in Type 1 Diabetes. *J Am Soc Nephrol* 2017;28:557-574

21. van Zuydam NR, Ahlqvist E, Sandholm N, Deshmukh H, Rayner NW, Abdalla M, Ladenvall C, Ziemek D, Fauman E, Robertson NR, McKeigue PM, Valo E, Forsblom C, Harjutsalo V, Finnish Diabetic Nephropathy S, Perna A, Rurali E, Marcovecchio ML, Igo RP, Jr., Salem RM, Perico N, Lajer M, Karajamaki A, Imamura M, Kubo M, Takahashi A, Sim X, Liu J, van Dam RM, Jiang G, Tam CHT, Luk AOY, Lee HM, Lim CKP, Szeto CC, So WY, Chan JCN, Hong Kong Diabetes Registry Theme-based Research Scheme Project G, Ang SF, Dorajoo R, Wang L, Clara TSH, McKnight AJ, Duffy S, Warren, Genetics of Kidneys in Diabetes Study G, Pezzolesi MG, Consortium G, Marre M, Gyorgy B, Hadjadj S, Hiraki LT, Diabetes C, Complications Trial /Epidemiology of Diabetes I, Complications Research G, Ahluwalia TS, Almgren P, Schulz CA, Orho-Melander M, Linneberg A, Christensen C, Witte DR, Grarup N, Brandslund I, Melander O, Paterson AD, Tregouet D, Maxwell AP, Lim SC, Ma RCW, Tai ES, Maeda S, Lyssenko V, Tuomi T, Krolewski AS, Rich SS, Hirschhorn JN, Florez JC, Dunger D, Pedersen O, Hansen T, Rossing P, Remuzzi G, Micro SUMf, Macrovascular hard endpoints for Innovative diabetes Tools C, Brosnan MJ, Palmer CNA,

Groop PH, Colhoun HM, Groop LC, McCarthy MI. A Genome-Wide Association Study of Diabetic Kidney Disease in Subjects With Type 2 Diabetes. *Diabetes* 2018;67:1414-1427

22. Wuttke M, Li Y, Li M, Sieber KB, Feitosa MF, Gorski M, Tin A, Wang L, Chu AY, Hoppmann A, Kirsten H, Giri A, Chai JF, Sveinbjornsson G, Tayo BO, Nutile T, Fuchsberger C, Marten J, Cocca M, Ghasemi S, Xu Y, Horn K, Noce D, van der Most PJ, Sedaghat S, Yu Z, Akiyama M, Afaq S, Ahluwalia TS, Almgren P, Amin N, Arnlov J, Bakker SJL, Bansal N, Baptista D, Bergmann S, Biggs ML, Biino G, Boehnke M, Boerwinkle E, Boissel M, Bottinger EP, Boutin TS, Brenner H, Brumat M, Burkhardt R, Butterworth AS, Campana E, Campbell A, Campbell H, Canouil M, Carroll RJ, Catamo E, Chambers JC, Chee ML, Chee ML, Chen X, Cheng CY, Cheng Y, Christensen K, Cifkova R, Ciullo M, Concas MP, Cook JP, Coresh J, Corre T, Sala CF, Cusi D, Danesh J, Daw EW, de Borst MH, De Grandi A, de Mutsert R, de Vries APJ, Degenhardt F, Delgado G, Demirkan A, Di Angelantonio E, Ditttrich K, Divers J, Dorajoo R, Eckardt KU, Ehret G, Elliott P, Endlich K, Evans MK, Felix JF, Foo VHX, Franco OH, Franke A, Freedman BI, Freitag-Wolf S, Friedlander Y, Froguel P, Gansevoort RT, Gao H, Gasparini P, Gaziano JM, Giedraitis V, Gieger C, Girotto G, Giulianini F, Gogele M, Gordon SD, Gudbjartsson DF, Gudnason V, Haller T, Hamet P, Harris TB, Hartman CA, Hayward C, Hellwege JN, Heng CK, Hicks AA, Hofer E, Huang W, Hutri-Kahonen N, Hwang SJ, Ikram MA, Indridason OS, Ingelsson E, Ising M, Jaddoe VVW, Jakobsdottir J, Jonas JB, Joshi PK, Josyula NS, Jung B, Kahonen M, Kamatani Y, Kammerer CM, Kanai M, Kastarinen M, Kerr SM, Khor CC, Kiess W, Kleber ME, Koenig W, Kooner JS, Korner A, Kovacs P, Kraja AT, Krajcoviechova A, Kramer H, Kramer BK, Kronenberg F, Kubo M, Kuhnel B, Kuokkanen M, Kuusisto J, La Bianca M, Laakso M, Lange LA, Langefeld CD, Lee JJ, Lehne B, Lehtimäki T, Lieb W, Lifelines Cohort S, Lim SC, Lind L, Lindgren CM, Liu J, Liu J, Loeffler M, Loos RJF, Lucae S, Lukas MA, Lyytikäinen LP, Magi R, Magnusson PKE, Mahajan A, Martin NG, Martins J, Marz W, Mascalzoni D, Matsuda K, Meisinger C, Meitinger T, Melander O, Metspalu A, Mikaelsdottir EK, Milaneschi Y, Miliku K, Mishra PP, Program VAMV, Mohlke KL, Mononen N, Montgomery GW, Mook-Kanamori DO, Mychaleckyj JC, Nadkarni GN, Nalls MA, Nauck M, Nikus K, Ning B, Nolte IM, Noordam R, O'Connell J, O'Donoghue ML, Olafsson I, Oldehinkel AJ, Orho-Melander M, Ouwehand WH, Padmanabhan S, Palmer ND, Palsson R, Penninx B, Perls T, Perola M, Pirastu M, Pirastu N, Pistis G, Podgornaja AI, Polasek O, Ponte B, Porteous DJ, Poulain T, Pramstaller PP, Preuss MH, Prins BP, Province MA, Rabelink TJ, Raffield LM, Raitakari OT, Reilly DF, Rettig R, Rheinberger M, Rice KM, Ridker PM, Rivadeneira F, Rizzi F, Roberts DJ, Robino A, Rossing P, Rudan I, Rueedi R, Ruggiero D, Ryan KA, Saba Y, Sabanayagam C, Salomaa V, Salvi E, Saum KU, Schmidt H, Schmidt R, Schottker B, Schulz CA, Schupf N, Shaffer CM, Shi Y, Smith AV, Smith BH, Soranzo N, Spracklen CN, Strauch K, Stringham HM, Stumvoll M, Svensson PO, Szymczak S, Tai ES, Tajuddin SM, Tan NYQ, Taylor KD, Teren A, Tham YC, Thiery J, Thio CHL, Thomsen H, Thorleifsson G, Toniolo D, Tonjes A, Tremblay J, Tzoulaki I, Uitterlinden AG, Vaccargiu S, van Dam RM, van der Harst P, van Duijn CM, Velez Edward DR, Verweij N, Vogelesang S, Volker U, Vollenweider P, Waeber G, Waldenberger M, Wallentin L, Wang YX, Wang C, Waterworth DM, Bin Wei W, White H, Whitfield JB, Wild SH, Wilson JF, Wojczynski MK, Wong C, Wong TY, Xu L, Yang Q, Yasuda M, Yerges-Armstrong LM, Zhang W, Zonderman AB, Rotter JI, Bochud M, Psaty BM, Vitart V, Wilson JG, Dehghan A, Parsa A, Chasman DI, Ho K, Morris AP, Devuyst O, Akilesh S, Pendergrass SA, Sim X, Boger CA, Okada Y, Edwards TL, Snieder H, Stefansson K, Hung AM, Heid IM, Scholz M, Teumer A, Kottgen A, Pattaro C. A catalog of genetic loci associated with kidney function from analyses of a million individuals. *Nat Genet* 2019;51:957-972

23. Das S, Forer L, Schonherr S, Sidore C, Locke AE, Kwong A, Vrieze SI, Chew EY, Levy S, McGue M, Schlessinger D, Stambolian D, Loh PR, Iacono WG, Swaroop A, Scott LJ, Cucca

- F, Kronenberg F, Boehnke M, Abecasis GR, Fuchsberger C. Next-generation genotype imputation service and methods. *Nat Genet* 2016;48:1284-1287
24. Evangelou E, Warren HR, Mosen-Ansorena D, Mifsud B, Pazoki R, Gao H, Ntritsos G, Dimou N, Cabrera CP, Karaman I, Ng FL, Evangelou M, Witkowska K, Tzanis E, Hellwege JN, Giri A, Velez Edwards DR, Sun YV, Cho K, Gaziano JM, Wilson PWF, Tsao PS, Kovesdy CP, Esko T, Magi R, Milani L, Almgren P, Boutin T, Debette S, Ding J, Giulianini F, Holliday EG, Jackson AU, Li-Gao R, Lin WY, Luan J, Mangino M, Oldmeadow C, Prins BP, Qian Y, Sargurupremraj M, Shah N, Surendran P, Theriault S, Verweij N, Willems SM, Zhao JH, Amouyel P, Connell J, de Mutsert R, Doney ASF, Farrall M, Menni C, Morris AD, Noordam R, Pare G, Poulter NR, Shields DC, Stanton A, Thom S, Abecasis G, Amin N, Arking DE, Ayers KL, Barbieri CM, Batini C, Bis JC, Blake T, Bochud M, Boehnke M, Boerwinkle E, Boomsma DI, Bottinger EP, Braund PS, Brumat M, Campbell A, Campbell H, Chakravarti A, Chambers JC, Chauhan G, Ciullo M, Cocca M, Collins F, Cordell HJ, Davies G, de Borst MH, de Geus EJ, Deary IJ, Deelen J, Del Greco MF, Demirkale CY, Dorr M, Ehret GB, Elosua R, Enroth S, Erzurumluoglu AM, Ferreira T, Franberg M, Franco OH, Gandin I, Gasparini P, Giedraitis V, Gieger C, Girotto G, Goel A, Gow AJ, Gudnason V, Guo X, Gyllenstein U, Hamsten A, Harris TB, Harris SE, Hartman CA, Havulinna AS, Hicks AA, Hofer E, Hofman A, Hottenga JJ, Huffman JE, Hwang SJ, Ingelsson E, James A, Jansen R, Jarvelin MR, Joehanes R, Johansson A, Johnson AD, Joshi PK, Jousilahti P, Jukema JW, Jula A, Kahonen M, Kathiresan S, Keavney BD, Khaw KT, Knekt P, Knight J, Kolcic I, Kooner JS, Koskinen S, Kristiansson K, Kutalik Z, Laan M, Larson M, Launer LJ, Lehne B, Lehtimäki T, Liewald DCM, Lin L, Lind L, Lindgren CM, Liu Y, Loos RJF, Lopez LM, Lu Y, Lyytikäinen LP, Mahajan A, Mamasoula C, Marrugat J, Marten J, Milaneschi Y, Morgan A, Morris AP, Morrison AC, Munson PJ, Nalls MA, Nandakumar P, Nelson CP, Niiranen T, Nolte IM, Nutile T, Oldehinkel AJ, Oostra BA, O'Reilly PF, Org E, Padmanabhan S, Palmas W, Palotie A, Pattie A, Penninx B, Perola M, Peters A, Polasek O, Pramstaller PP, Nguyen QT, Raitakari OT, Ren M, Rettig R, Rice K, Ridker PM, Ried JS, Riese H, Ripatti S, Robino A, Rose LM, Rotter JJ, Rudan I, Ruggiero D, Saba Y, Sala CF, Salomaa V, Samani NJ, Sarin AP, Schmidt R, Schmidt H, Shrine N, Siscovick D, Smith AV, Snieder H, Sober S, Sorice R, Starr JM, Stott DJ, Strachan DP, Strawbridge RJ, Sundstrom J, Swertz MA, Taylor KD, Teumer A, Tobin MD, Tomaszewski M, Toniolo D, Traglia M, Trompet S, Tuomilehto J, Tzourio C, Uitterlinden AG, Vaez A, van der Most PJ, van Duijn CM, Vergnaud AC, Verwoert GC, Vitart V, Volker U, Vollenweider P, Vuckovic D, Watkins H, Wild SH, Willemsen G, Wilson JF, Wright AF, Yao J, Zemunik T, Zhang W, Attia JR, Butterworth AS, Chasman DI, Conen D, Cucca F, Danesh J, Hayward C, Howson JMM, Laakso M, Lakatta EG, Langenberg C, Melander O, Mook-Kanamori DO, Palmer CNA, Risch L, Scott RA, Scott RJ, Sever P, Spector TD, van der Harst P, Wareham NJ, Zeggini E, Levy D, Munroe PB, Newton-Cheh C, Brown MJ, Metspalu A, Hung AM, O'Donnell CJ, Edwards TL, Psaty BM, Tzoulaki I, Barnes MR, Wain LV, Elliott P, Caulfield MJ, Million Veteran P. Genetic analysis of over 1 million people identifies 535 new loci associated with blood pressure traits. *Nat Genet* 2018;50:1412-1425
25. Whelton PK, Carey RM, Aronow WS, Casey DE, Jr., Collins KJ, Dennison Himmelfarb C, DePalma SM, Gidding S, Jamerson KA, Jones DW, MacLaughlin EJ, Muntner P, Ovbiagele B, Smith SC, Jr., Spencer CC, Stafford RS, Taler SJ, Thomas RJ, Williams KA, Sr., Williamson JD, Wright JT, Jr. 2017 ACC/AHA/AAPA/ABC/ACPM/AGS/APhA/ASH/ASPC/NMA/PCNA Guideline for the Prevention, Detection, Evaluation, and Management of High Blood Pressure in Adults: Executive Summary: A Report of the American College of Cardiology/American Heart Association Task Force on Clinical Practice Guidelines. *Hypertension* 2018;71:1269-1324
26. American Diabetes A. 9. Cardiovascular Disease and Risk Management: Standards of Medical Care in Diabetes-2018. *Diabetes Care* 2018;41:S86-S104

27. Staley JR, Blackshaw J, Kamat MA, Ellis S, Surendran P, Sun BB, Paul DS, Freitag D, Burgess S, Danesh J, Young R, Butterworth AS. PhenoScanner: a database of human genotype-phenotype associations. *Bioinformatics* 2016;32:3207-3209
28. Kamat MA, Blackshaw JA, Young R, Surendran P, Burgess S, Danesh J, Butterworth AS, Staley JR. PhenoScanner V2: an expanded tool for searching human genotype-phenotype associations. *Bioinformatics* 2019;35:4851-4853
29. Watanabe K, Stringer S, Frei O, Umicevic Mirkov M, de Leeuw C, Polderman TJC, van der Sluis S, Andreassen OA, Neale BM, Posthuma D. A global overview of pleiotropy and genetic architecture in complex traits. *Nat Genet* 2019;51:1339-1348
30. Ghoussaini M, Mountjoy E, Carmona M, Peat G, Schmidt EM, Hercules A, Fumis L, Miranda A, Carvalho-Silva D, Buniello A, Burdett T, Hayhurst J, Baker J, Ferrer J, Gonzalez-Uriarte A, Jupp S, Karim MA, Koscielny G, Machlitt-Northen S, Malangone C, Pendlington ZM, Roncaglia P, Suveges D, Wright D, Vrousseau O, Papa E, Parkinson H, MacArthur JAL, Todd JA, Barrett JC, Schwartzentruber J, Hulcoop DG, Ochoa D, McDonagh EM, Dunham I. Open Targets Genetics: systematic identification of trait-associated genes using large-scale genetics and functional genomics. *Nucleic Acids Res* 2021;49:D1311-D1320
31. Kanai M, Akiyama M, Takahashi A, Matoba N, Momozawa Y, Ikeda M, Iwata N, Ikegawa S, Hirata M, Matsuda K, Kubo M, Okada Y, Kamatani Y. Genetic analysis of quantitative traits in the Japanese population links cell types to complex human diseases. *Nat Genet* 2018;50:390-400
32. Sakaue S, Kanai M, Tanigawa Y, Karjalainen J, Kurki M, Koshihara S, Narita A, Konuma T, Yamamoto K, Akiyama M, Ishigaki K, Suzuki A, Suzuki K, Obara W, Yamaji K, Takahashi K, Asai S, Takahashi Y, Suzuki T, Shinozaki N, Yamaguchi H, Minami S, Murayama S, Yoshimori K, Nagayama S, Obata D, Higashiyama M, Masumoto A, Koretsune Y, FinnGen, Ito K, Terao C, Yamauchi T, Komuro I, Kadowaki T, Tamiya G, Yamamoto M, Nakamura Y, Kubo M, Murakami Y, Yamamoto K, Kamatani Y, Palotie A, Rivas MA, Daly MJ, Matsuda K, Okada Y. A cross-population atlas of genetic associations for 220 human phenotypes. *Nat Genet* 2021;53:1415-1424
33. Zhu Z, Wang X, Li X, Lin Y, Shen S, Liu CL, Hobbs BD, Hasegawa K, Liang L, International CGC, Boezen HM, Camargo CA, Jr., Cho MH, Christiani DC. Genetic overlap of chronic obstructive pulmonary disease and cardiovascular disease-related traits: a large-scale genome-wide cross-trait analysis. *Respir Res* 2019;20:64
34. Yengo L, Sidorenko J, Kemper KE, Zheng Z, Wood AR, Weedon MN, Frayling TM, Hirschhorn J, Yang J, Visscher PM, Consortium G. Meta-analysis of genome-wide association studies for height and body mass index in approximately 700000 individuals of European ancestry. *Hum Mol Genet* 2018;27:3641-3649
35. Han B, Eskin E. Random-effects model aimed at discovering associations in meta-analysis of genome-wide association studies. *Am J Hum Genet* 2011;88:586-598
36. Gamazon ER, Wheeler HE, Shah KP, Mozaffari SV, Aquino-Michaels K, Carroll RJ, Eyster AE, Denny JC, Nicolae DL, Cox NJ, Im HK, Consortium G. A gene-based association method for mapping traits using reference transcriptome data. *Nature Genetics* 2015;47:1091-+
37. Barbeira AN, Dickinson SP, Bonazzola R, Zheng J, Wheeler HE, Torres JM, Torstenson ES, Shah KP, Garcia T, Edwards TL, Stahl EA, Huckins LM, Consortium GT, Nicolae DL, Cox NJ, Im HK. Exploring the phenotypic consequences of tissue specific gene expression variation inferred from GWAS summary statistics. *Nat Commun* 2018;9:1825
38. Barbeira AN, Bonazzola R, Gamazon ER, Liang YY, Park Y, Kim-Hellmuth S, Wang G, Jiang ZX, Zhou D, Hormozdiari F, Liu BX, Rao A, Hamel AR, Pividori MD, Aguet F, Bastarache L, Jordan DM, Verbanck M, Do R, Stephens M, Ardlie K, McCarthy M, Montgomery SB, Segre AV, Brown CD, Lappalainen T, Wen XQ, Im HK, Grp GGW,

- Consortium G. Exploiting the GTEx resources to decipher the mechanisms at GWAS loci. *Genome Biol* 2021;22
39. Chang CC, Chow CC, Tellier LC, Vattikuti S, Purcell SM, Lee JJ. Second-generation PLINK: rising to the challenge of larger and richer datasets. *Gigascience* 2015;4:7
40. Willer CJ, Li Y, Abecasis GR. METAL: fast and efficient meta-analysis of genomewide association scans. *Bioinformatics* 2010;26:2190-2191
41. Watanabe K, Taskesen E, van Bochoven A, Posthuma D. Functional mapping and annotation of genetic associations with FUMA. *Nat Commun* 2017;8:1826



**Supplementary Figure S1. Number of individuals included in A) the HKDR Study, B) the HKDB Phase 1 Study], and C) the HKDB Phase 2 Study.** Each of the cardio-renal outcome was defined based on the discharge principle diagnoses of hospital admissions and mortality until 31st December, 2019. Hospital discharge principal diagnoses were coded by the International Classification of Diseases (ICD), version 9 and were used to identify the outcome events, which occurred either at baseline (i.e. history of outcome) or during follow-up (i.e. incidence of outcome). In the case-control analysis, patients who had a particular outcome either at baseline or during follow-up were enrolled in the group of cases. The counterpart controls for each outcome were defined as patients who 1) had duration of diabetes >10 years, and 2) were free from cardiovascular (chronic kidney) disease for the analysis of cardiovascular (renal) outcomes. In the prospective analysis, we included the patients who had no history but incidence of a particular outcome in the event group, while patients without both history and incidence of the outcome were included in the non-event group.

A

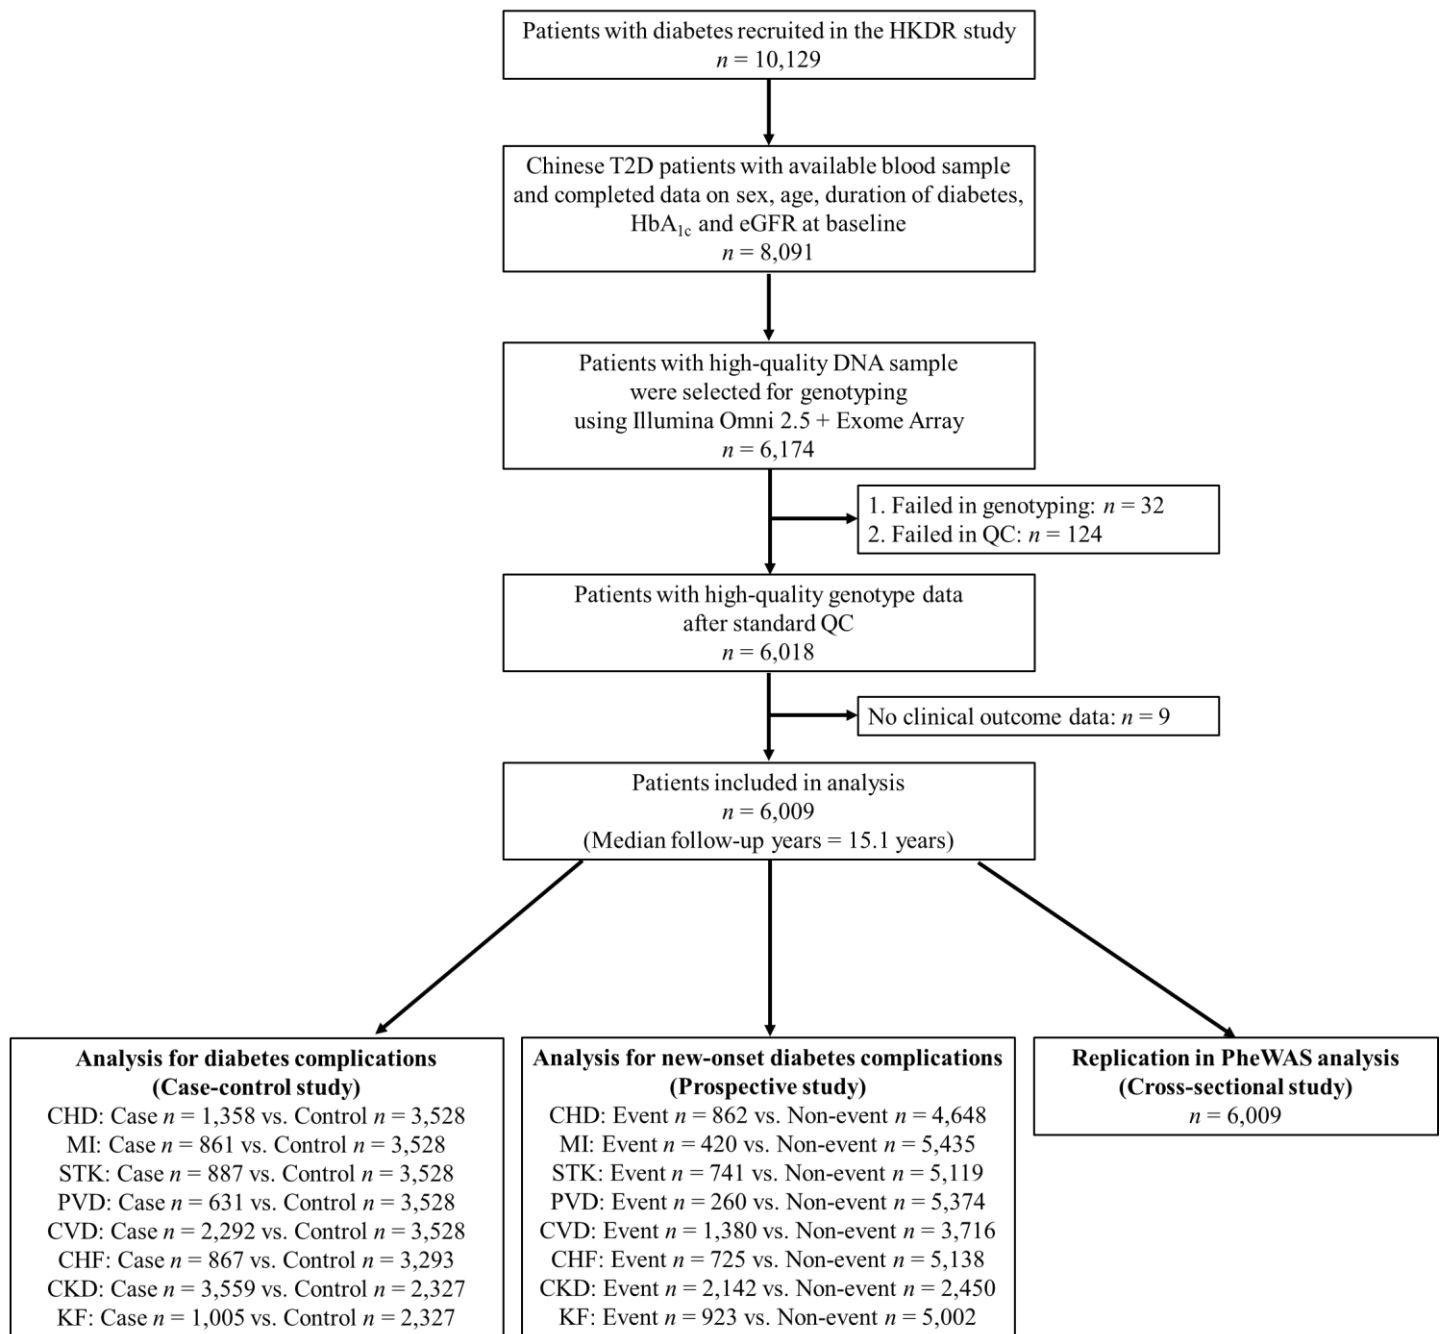

**B**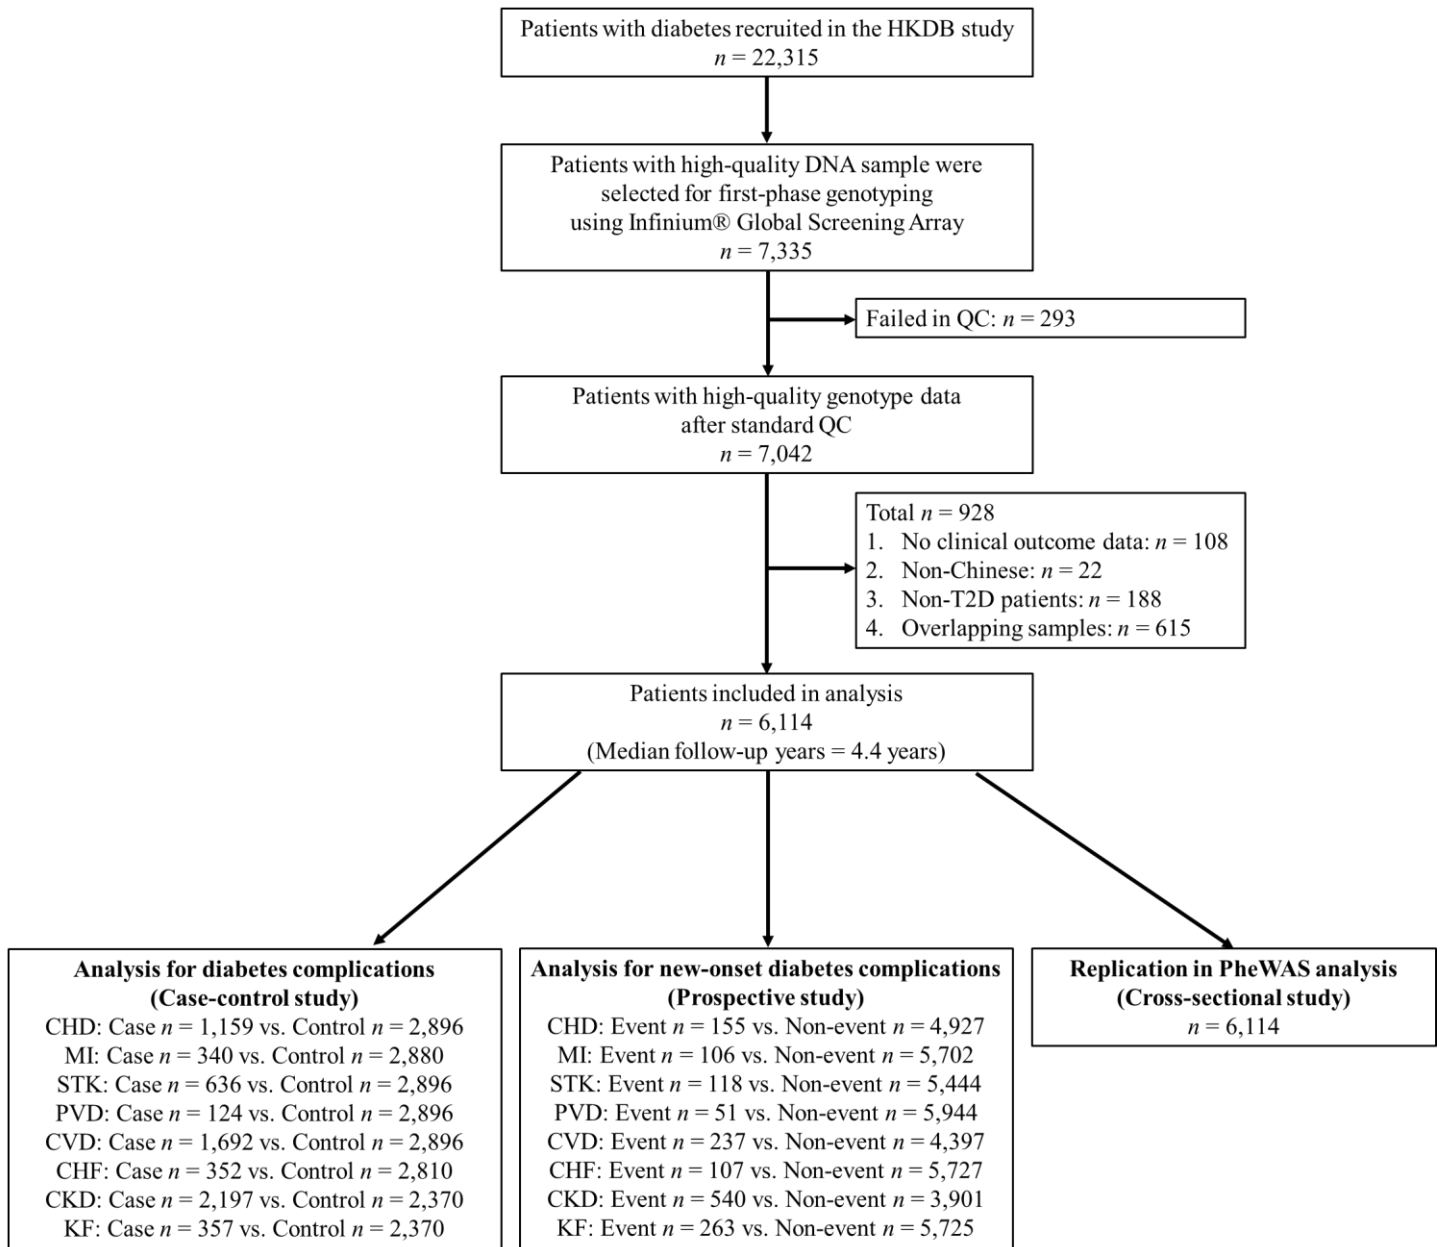

C

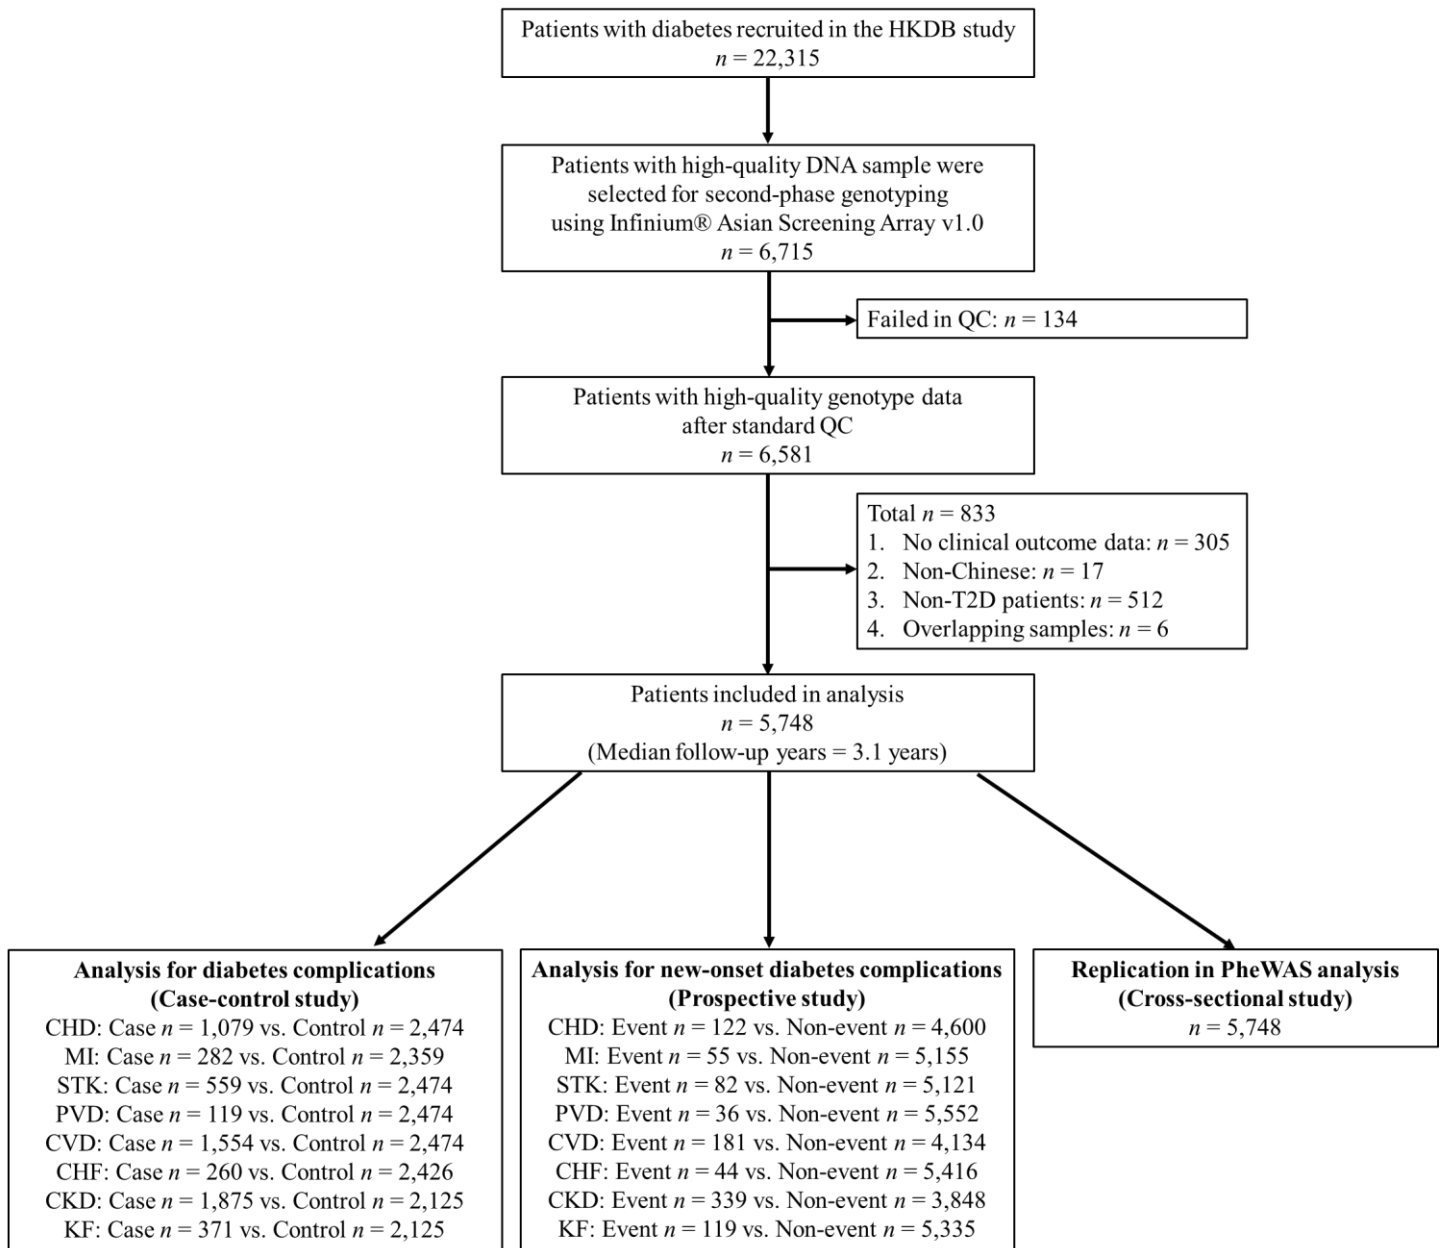

**Supplementary Figure S2. Multi-tissue eQTL comparison between *PDE1A* expression and rs10171703.** The tissues include those with >70 samples, and with matched gene expression and genotype data in the Genotype Tissue Expression (GTEx) database (<http://www.gtexportal.org/home/>). The estimate corresponds to the normalized effect size (NES) of the eQTL, which is defined as the slope (i.e.  $\beta$ -coefficient) of the linear regression between genotype and expression, and is computed as the effect of the alternative C-allele relative to the reference T-allele. The  $p$ -values were obtained for each variant-gene pair by testing the null hypothesis that NES is equal to zero. A false discovery rate (FDR) threshold of  $\leq 0.05$  was applied to identify genes with a significant eQTL (highlighted in red colour). To combine gene expression data across many tissues, meta-analysis was conducted using a random effects model named “RE2” in Metasoft (35).

# Meta Analysis $P_{RE2} = 2.6 \times 10^{-11}$

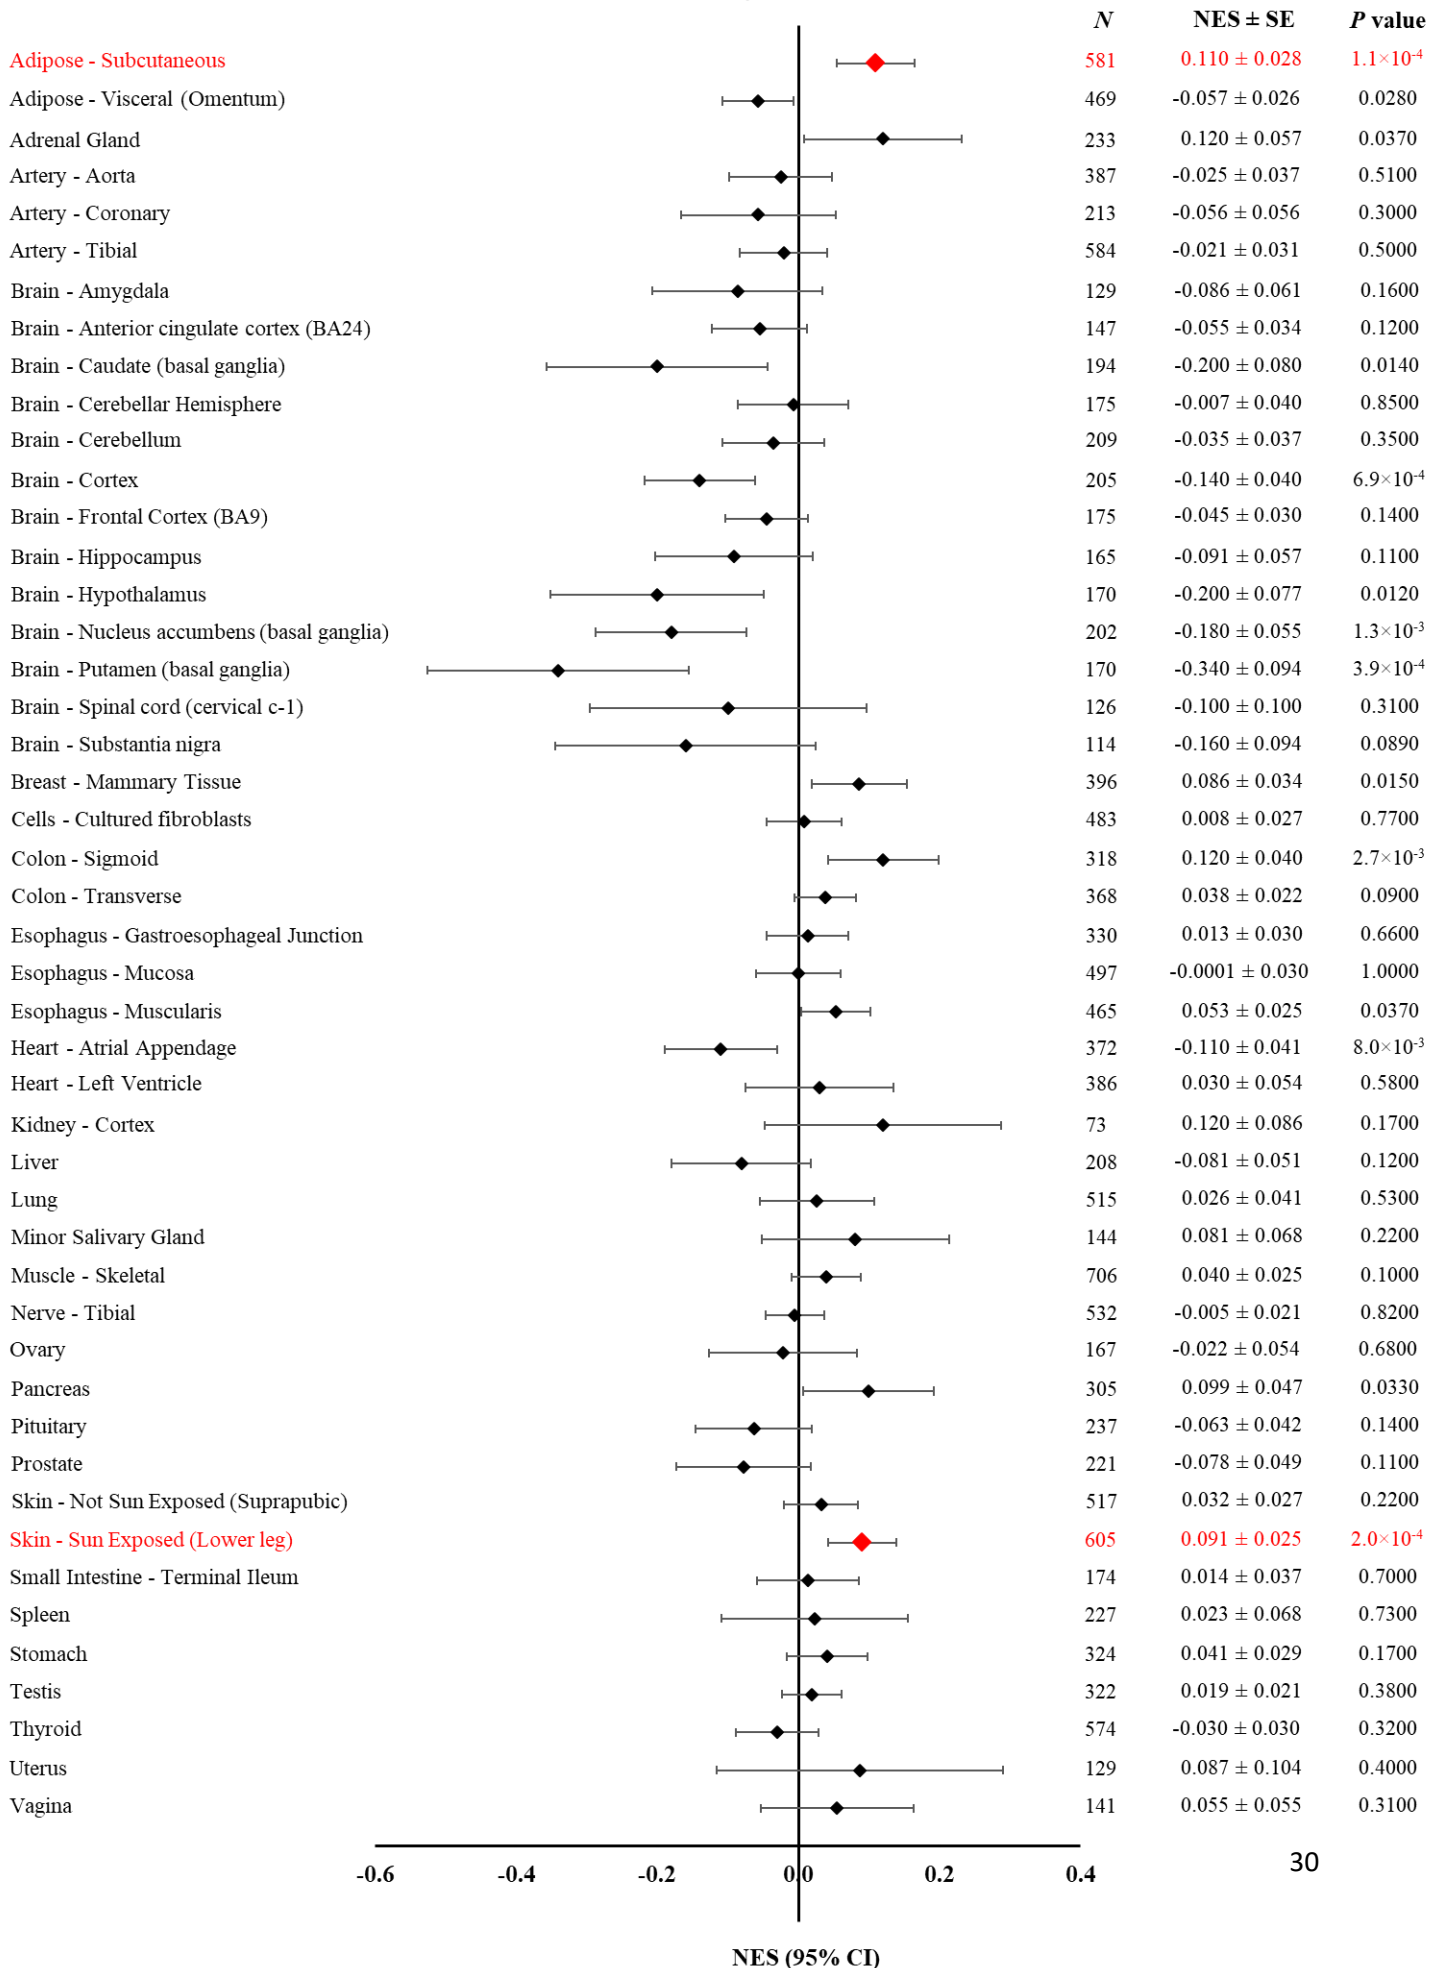

**Supplementary Figure S3. Gene expression level of *PDE1A* according to the genotypes of rs10171703 in the A) adipose ( $n = 581$ ) and B) skin tissues ( $n = 605$ ), using data from the GTEx portal (<http://www.gtexportal.org/home/>). The normalized effect size (NES) of the eQTL, is defined as the slope (i.e.  $\beta$ -coefficient) of the linear regression between genotype and expression, and is computed as the effect of the alternative C-allele relative to the reference T-allele. The  $p$ -values were obtained for each variant-gene pair by testing the null hypothesis that NES is equal to zero.**

**A)**

**Adipose - Subcutaneous**

$$\text{NES} \pm \text{SE} = 0.110 \pm 0.028$$

$$P_{\text{linear}} = 1.1 \times 10^{-4}$$

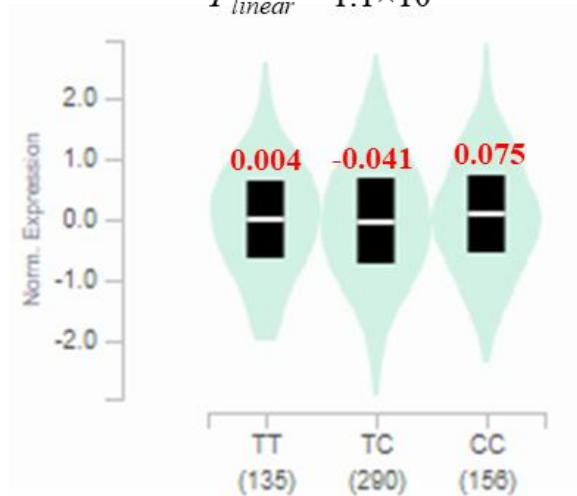

**B)**

**Skin - Sun Exposed (Lower leg)**

$$\text{NES} \pm \text{SE} = 0.091 \pm 0.025$$

$$P_{\text{linear}} = 2.0 \times 10^{-4}$$

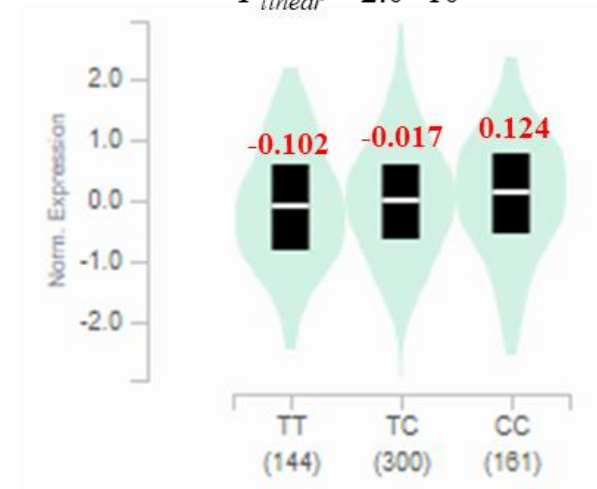

**Supplementary Figure S4. Association of blood pressure goal attainment with new-onset coronary heart disease (A) and myocardial infarction (B) according to *PDE1A* rs10171703 genotype among Chinese patients with type 2 diabetes.** These analyses were conducted in the combined cohort of the HKDR Study, the HKDB Phase 1 and 2 Studies.  $P_{interaction}$  was the  $p$ -value of the interaction term obtained from the Cox regression model including two main effects (e.g. *PDE1A* rs10171703 and achievement of blood pressure goal [i.e. SBP <130 mmHg and DBP <80 mmHg]), the interaction term of main effects, and the covariates (i.e. study cohorts [HKDR Study, HKDB Phase 1 and 2 Studies], enrolment year, sex, age, duration of diabetes, and principal components [PCs]). Hazard ratio (HR) and 95% CI were obtained from the Cox regression model assessing the association between the achievement of blood pressure goal ('yes' [coded as 1] vs. 'no' [coded as 0]) and incidence of diabetes cardiovascular complications, adjusting for study cohorts (HKDR Study, HKDB Phase 1 and 2 Studies), enrolment year, sex, age, duration of diabetes, and PCs. Event: patients had no history but incidence of outcome; non-event: patients had neither history nor incidence of outcome.

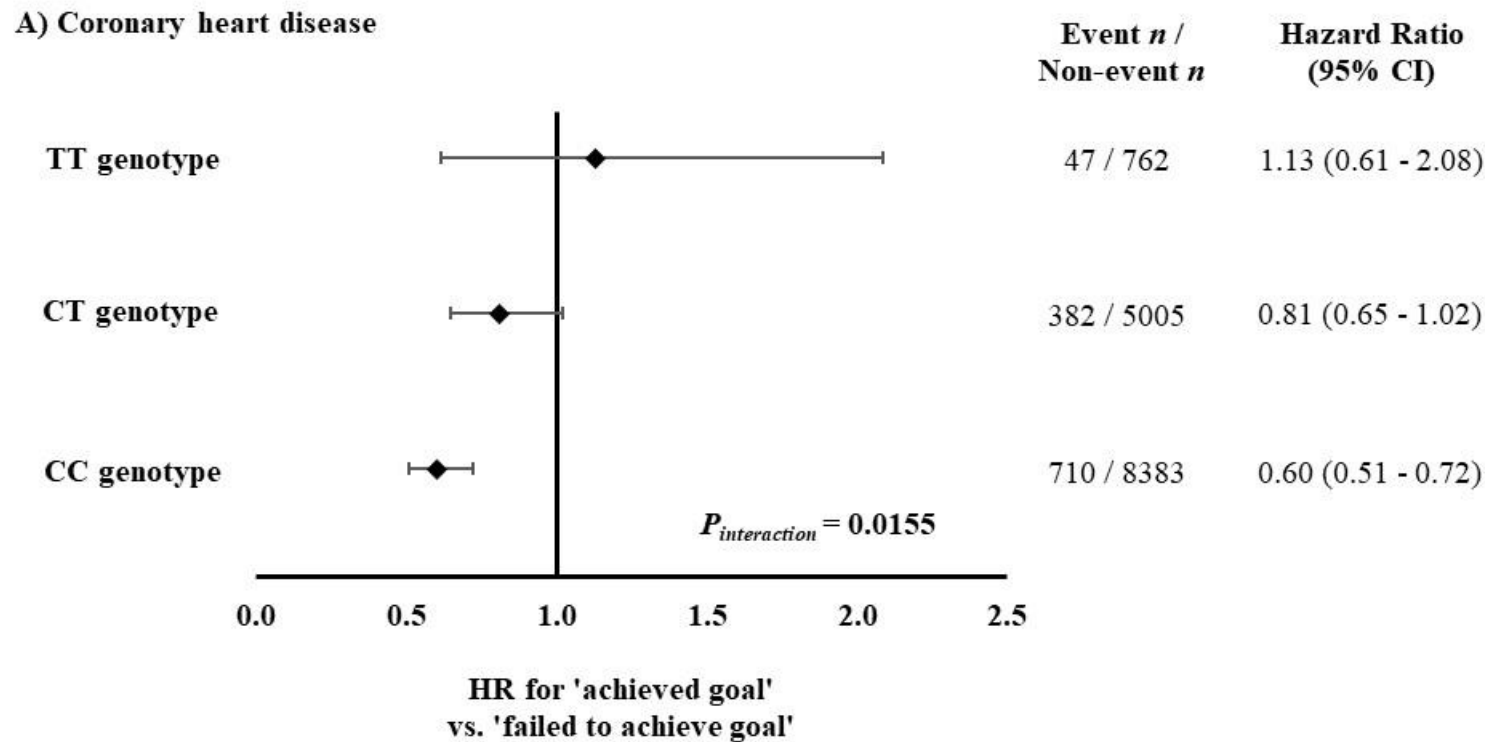



**B) Myocardial infarction**

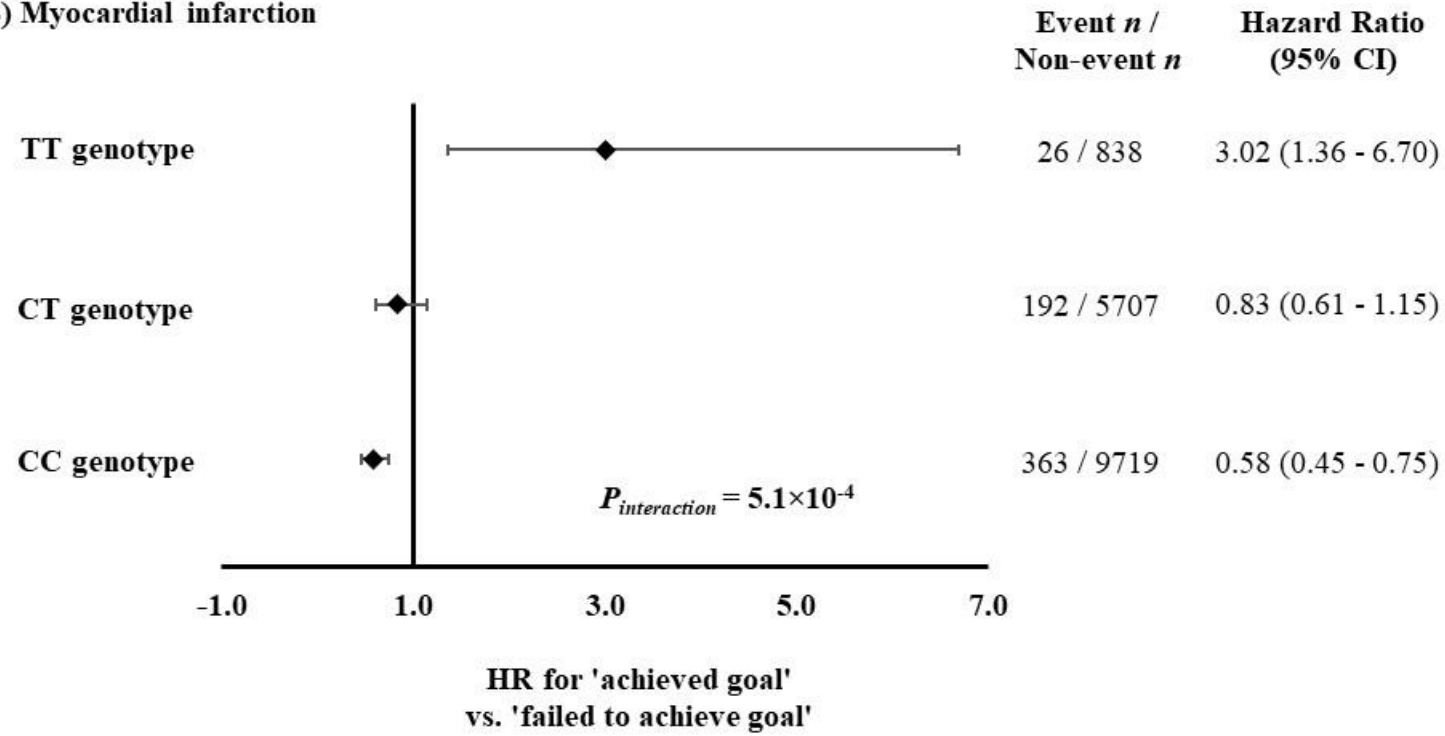

**Supplementary Figure S5. Principal component analysis (PCA) in the HKDR Study, and the HKDB Phase 1 and 2 Studies.** The PCA plots show the first two principal components, based on genotype data of 26 different populations from the 1000 Genomes Project, as well as each cohort of Chinese patients with type 2 diabetes (T2D) in this study [(A) 6,009 patients with T2D from the HKDR Study; (B) 6,114 patients with T2D from the HKDB Phase 1 Study; and (C) 5,748 patients with T2D from the HKDB Phase 2 Study]. The 26 populations from the 1000 Genomes Project have been divided into 5 super populations: 1) African (AFR) includes Yoruba in Ibadan, Nigeria, Luhya in Webuye, Kenya, Gambian in Western Divisions in the Gambia, Mende in Sierra Leone, Esan in Nigeria, Americans of African Ancestry in SW USA, and African Caribbeans in Barbados; 2) Ad Mixed American (AMR) includes Mexican Ancestry from Los Angeles USA, Puerto Ricans from Puerto Rico, Colombians from Medellin, and Colombia, Peruvians from Lima, Peru; 3) South Asian (SAS) includes Gujarati Indian from Houston, Texas, Punjabi from Lahore, Pakistan, Bengali from Bangladesh, Sri Lankan Tamil from the UK, and Indian Telugu from the UK; 4) European (EUR) includes Utah Residents (CEPH) with Northern and Western European Ancestry, Toscani in Italia, Finnish in Finland, British in England and Scotland, and Iberian Population in Spain; and 5) East Asian (EAS) includes Han Chinese in Beijing, China, Japanese in Tokyo, Japan, Southern Han Chinese, Chinese Dai in Xishuangbanna, China, and Kinh in Ho Chi Minh City, Vietnam.

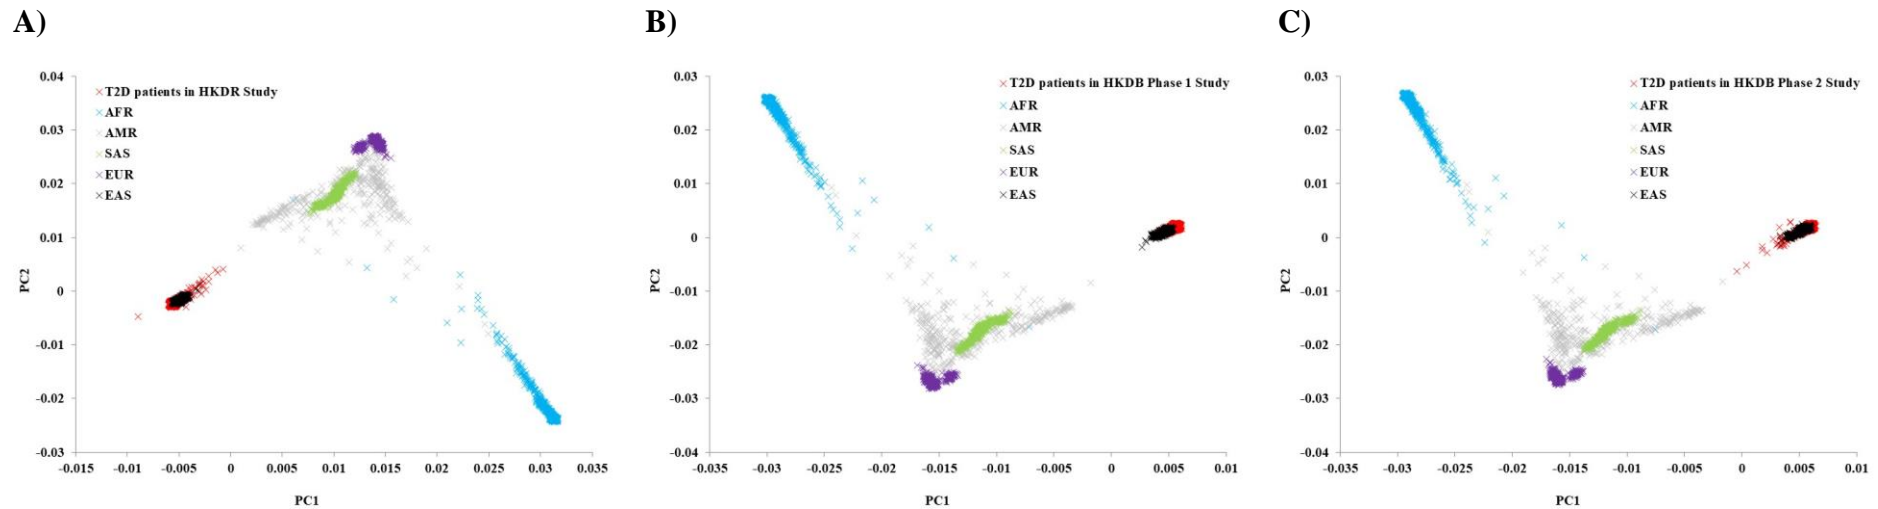

**Supplementary Table S1.** Clinical characteristics for all Chinese patients with type 2 diabetes included in the two-stage GWAS analysis, stratified by the status of coronary heart disease.

| Phenotype                                   | CHD status in HKDR Study<br>Cohort for genome-wide scan<br>Enrolment year: 1994 - 2007<br>Genotyping platform:<br>Illumina Omni 2.5 + Exome Array |                    |         | CHD status in HKDB Phase 1 Study<br>Cohort for genome-wide scan<br>Enrolment year: 2013 - 2019<br>Genotyping platform:<br>Infinium® Global Screening Array |                    |         | CHD status in HKDB Phase 2 Study<br>Cohort for follow-up of top signals<br>Enrolment year: 2014 - 2019<br>Genotyping platform:<br>Infinium® Asian Screening Array v1.0 |                    |         |
|---------------------------------------------|---------------------------------------------------------------------------------------------------------------------------------------------------|--------------------|---------|------------------------------------------------------------------------------------------------------------------------------------------------------------|--------------------|---------|------------------------------------------------------------------------------------------------------------------------------------------------------------------------|--------------------|---------|
|                                             | Yes (n = 1,358)                                                                                                                                   | No (n = 3,528)     | P       | Yes (n = 1,159)                                                                                                                                            | No (n = 2,896)     | P       | Yes (n = 1,079)                                                                                                                                                        | No (n = 2,474)     | P       |
| <i>Clinical characteristics at baseline</i> |                                                                                                                                                   |                    |         |                                                                                                                                                            |                    |         |                                                                                                                                                                        |                    |         |
| Male % (N)                                  | 51.4% (698)                                                                                                                                       | 41.3% (1,458)      | <0.0001 | 74.2% (860)                                                                                                                                                | 54.4% (1,574)      | <0.0001 | 75.9% (819)                                                                                                                                                            | 53.7% (1,328)      | <0.0001 |
| Age (years)                                 | 61.7 ± 11.4                                                                                                                                       | 53.8 ± 13.1        | <0.0001 | 65.5 ± 9.31                                                                                                                                                | 61.9 ± 10.1        | <0.0001 | 64.9 ± 9.09                                                                                                                                                            | 61.5 ± 10.2        | <0.0001 |
| Age Onset (years)                           | 52.8 ± 11.6                                                                                                                                       | 47.0 ± 12.1        | <0.0001 | 52.8 ± 10.8                                                                                                                                                | 47.2 ± 10.2        | <0.0001 | 52.2 ± 10.9                                                                                                                                                            | 45.5 ± 10.3        | <0.0001 |
| Duration of diabetes (years)                | 8.78 ± 7.03                                                                                                                                       | 6.67 ± 6.40        | <0.0001 | 12.6 ± 8.79                                                                                                                                                | 14.7 ± 6.96        | <0.0001 | 12.7 ± 9.05                                                                                                                                                            | 16.0 ± 6.83        | <0.0001 |
| Follow-up time (years)                      | 8.21 (3.37 - 13.6)                                                                                                                                | 17.5 (14.2 - 21.8) | <0.0001 | 4.19 (3.38 - 4.65)                                                                                                                                         | 4.44 (4.09 - 4.85) | <0.0001 | 2.84 (2.41 - 3.33)                                                                                                                                                     | 3.14 (2.76 - 3.51) | <0.0001 |
| Smoking status % (N)                        | --                                                                                                                                                | --                 | <0.0001 | --                                                                                                                                                         | --                 | <0.0001 | --                                                                                                                                                                     | --                 | <0.0001 |
| Non-smoker                                  | 63.7% (865)                                                                                                                                       | 75.3% (2,655)      | --      | 53.2% (617)                                                                                                                                                | 72.0% (2,085)      | --      | 50.8% (548)                                                                                                                                                            | 69.8% (1,727)      | --      |
| Ex-smoker                                   | 22.2% (302)                                                                                                                                       | 12.8% (452)        | --      | 33.6% (389)                                                                                                                                                | 18.4% (534)        | --      | 35.2% (380)                                                                                                                                                            | 19.3% (477)        | --      |
| Current smoker                              | 14.0% (190)                                                                                                                                       | 11.7% (413)        | --      | 13.2% (153)                                                                                                                                                | 9.50% (276)        | --      | 14.0% (151)                                                                                                                                                            | 10.8% (266)        | --      |
| Body height (m)                             | 1.58 ± 0.08                                                                                                                                       | 1.58 ± 0.08        | 0.7005  | 1.63 ± 0.08                                                                                                                                                | 1.62 ± 0.09        | <0.0001 | 1.63 ± 0.08                                                                                                                                                            | 1.61 ± 0.09        | <0.0001 |
| Body weight (kg)                            | 63.5 (56.0 - 71.5)                                                                                                                                | 62.0 (54.7 - 70.0) | 0.0003  | 70.0 (62.0 - 78.7)                                                                                                                                         | 66.6 (58.7 - 76.4) | <0.0001 | 71.1 (63.0 - 79.8)                                                                                                                                                     | 67.0 (58.6 - 77.0) | <0.0001 |
| BMI (kg/m <sup>2</sup> )                    | 25.3 (23.0 - 27.6)                                                                                                                                | 24.7 (22.4 - 27.4) | <0.0001 | 26.1 (23.8 - 28.9)                                                                                                                                         | 25.6 (22.9 - 28.5) | <0.0001 | 26.5 (24.3 - 29.3)                                                                                                                                                     | 25.7 (23.2 - 28.8) | <0.0001 |
| Waist circumference (cm)                    |                                                                                                                                                   |                    |         |                                                                                                                                                            |                    |         |                                                                                                                                                                        |                    |         |
| Males                                       | 89.9 ± 9.11                                                                                                                                       | 87.9 ± 10.1        | <0.0001 | 95.2 ± 10.2                                                                                                                                                | 93.4 ± 10.5        | <0.0001 | 95.3 ± 10.3                                                                                                                                                            | 93.4 ± 10.7        | <0.0001 |
| Females                                     | 85.6 ± 9.66                                                                                                                                       | 82.6 ± 9.88        | <0.0001 | 89.3 ± 10.6                                                                                                                                                | 88.8 ± 11.2        | 0.4596  | 89.1 ± 10.4                                                                                                                                                            | 88.5 ± 11.6        | 0.4415  |
| Hip circumference (cm)                      | 96.9 ± 7.78                                                                                                                                       | 96.4 ± 8.19        | 0.0664  | 96.6 ± 8.14                                                                                                                                                | 96.3 ± 8.24        | 0.3492  | 97.6 ± 7.51                                                                                                                                                            | 96.9 ± 8.31        | 0.0338  |
| Waist-hip-ratio                             | 0.91 ± 0.07                                                                                                                                       | 0.88 ± 0.07        | <0.0001 | 0.97 ± 0.07                                                                                                                                                | 0.95 ± 0.07        | <0.0001 | 0.96 ± 0.07                                                                                                                                                            | 0.94 ± 0.07        | <0.0001 |
| HbA <sub>1C</sub> (%)                       | 7.60 (6.60 - 8.90)                                                                                                                                | 7.10 (6.30 - 8.30) | <0.0001 | 7.30 (6.70 - 8.30)                                                                                                                                         | 7.50 (6.80 - 8.40) | <0.0001 | 7.40 (6.70 - 8.40)                                                                                                                                                     | 7.70 (6.90 - 8.60) | <0.0001 |
| Total cholesterol (mmol/l)                  | 5.14 (4.50 - 6.00)                                                                                                                                | 5.10 (4.40 - 5.80) | 0.0055  | 3.91 (3.44 - 4.53)                                                                                                                                         | 4.25 (3.76 - 4.80) | <0.0001 | 3.79 (3.30 - 4.40)                                                                                                                                                     | 4.18 (3.67 - 4.75) | <0.0001 |
| Triglycerides (mmol/l)                      | 1.52 (1.09 - 2.25)                                                                                                                                | 1.32 (0.92 - 2.00) | <0.0001 | 1.37 (0.98 - 2.00)                                                                                                                                         | 1.29 (0.91 - 1.89) | <0.0001 | 1.40 (1.00 - 2.02)                                                                                                                                                     | 1.33 (0.92 - 1.97) | 0.0047  |
| HDL-cholesterol (mmol/l)                    | 1.20 (1.00 - 1.42)                                                                                                                                | 1.28 (1.09 - 1.54) | <0.0001 | 1.09 (0.92 - 1.31)                                                                                                                                         | 1.20 (1.01 - 1.46) | <0.0001 | 1.07 (0.90 - 1.28)                                                                                                                                                     | 1.17 (0.99 - 1.41) | <0.0001 |
| LDL-cholesterol (mmol/l)                    | 3.10 (2.44 - 3.80)                                                                                                                                | 3.00 (2.41 - 3.65) | 0.0354  | 2.07 (1.63 - 2.58)                                                                                                                                         | 2.31 (1.90 - 2.76) | <0.0001 | 1.95 (1.55 - 2.41)                                                                                                                                                     | 2.24 (1.82 - 2.71) | <0.0001 |
| Systolic blood pressure (mmHg)              | 140 ± 21.2                                                                                                                                        | 132 ± 19.4         | <0.0001 | 137 ± 18.2                                                                                                                                                 | 135 ± 17.4         | 0.0002  | 136 ± 18.3                                                                                                                                                             | 134 ± 16.8         | <0.0001 |
| Diastolic blood pressure (mmHg)             | 75.7 ± 11.3                                                                                                                                       | 75.3 ± 10.6        | 0.2470  | 74.9 ± 10.9                                                                                                                                                | 74.0 ± 10.9        | 0.0237  | 73.9 ± 11.5                                                                                                                                                            | 72.9 ± 10.9        | 0.0149  |

|                                                                                      |                    |                    |         |                    |                    |         |                    |                    |         |
|--------------------------------------------------------------------------------------|--------------------|--------------------|---------|--------------------|--------------------|---------|--------------------|--------------------|---------|
| Albumin-creatinine-ratio (mg/mmol)                                                   | 3.70 (1.09 - 24.2) | 1.50 (0.70 - 6.06) | <0.0001 | 4.00 (1.10 - 18.1) | 2.60 (1.00 - 11.9) | <0.0001 | 3.95 (1.10 - 20.7) | 2.90 (1.00 - 12.2) | 0.0021  |
| eGFR (min/ml per 1.73 m <sup>2</sup> )                                               | 71.6 ± 25.2        | 86.7 ± 23.8        | <0.0001 | 68.0 ± 24.9        | 78.5 ± 23.3        | <0.0001 | 67.3 ± 25.7        | 77.4 ± 24.3        | <0.0001 |
| <i><u>Treatment at baseline</u></i>                                                  |                    |                    |         |                    |                    |         |                    |                    |         |
| Lipid lowering % (N)                                                                 | 30.6% (415)        | 13.6% (480)        | <0.0001 | 87.7% (1,004)      | 71.5% (2,042)      | <0.0001 | 89.3% (958)        | 70.5% (1,724)      | <0.0001 |
| Blood pressure anti-hypertensive % (N)                                               | 63.2% (858)        | 37.1% (1,310)      | <0.0001 | 89.9% (1,029)      | 77.6% (2,210)      | <0.0001 | 88.7% (950)        | 75.2% (1,839)      | <0.0001 |
| ACE inhibitor % (N)                                                                  | 30.9% (420)        | 17.2% (608)        | <0.0001 | --                 | --                 | --      | --                 | --                 | --      |
| Oral glucose lowering % (N)                                                          | 69.1% (938)        | 65.7% (2,319)      | 0.0265  | 84.1% (430)        | 93.0% (1,121)      | <0.0001 | 88.5% (897)        | 93.6% (2,177)      | <0.0001 |
| Insulin treatment % (N)                                                              | 24.1% (327)        | 13.8% (486)        | <0.0001 | 35.9% (405)        | 40.4% (1,139)      | 0.0085  | 35.2% (373)        | 47.2% (1,147)      | <0.0001 |
| <i><u>History of cardio-renal complications at baseline</u></i>                      |                    |                    |         |                    |                    |         |                    |                    |         |
| Coronary heart disease % (N)                                                         | 36.5% (495)        | 0.00% (0)          | <0.0001 | 86.6% (1,004)      | 0.00% (0)          | <0.0001 | 88.7% (957)        | 0.00% (0)          | <0.0001 |
| Myocardial infarction % (N)                                                          | 35.9% (488)        | 0.00% (0)          | <0.0001 | 20.4% (234)        | 0.00% (0)          | <0.0001 | 22.3% (228)        | 0.00% (0)          | <0.0001 |
| Peripheral vascular disease (N)                                                      | 3.40% (46)         | 0.00% (0)          | <0.0001 | 12.0% (139)        | 0.00% (0)          | <0.0001 | 12.1% (131)        | 0.00% (0)          | <0.0001 |
| Stroke % (N)                                                                         | 9.80% (133)        | 0.00% (0)          | <0.0001 | 2.40% (28)         | 0.00% (0)          | <0.0001 | 2.70% (29)         | 0.00% (0)          | <0.0001 |
| Cardiovascular diseases % (N)                                                        | 43.4% (589)        | 0.00% (0)          | <0.0001 | 89.2% (1,034)      | 0.00% (0)          | <0.0001 | 90.7% (979)        | 0.00% (0)          | <0.0001 |
| Congestive heart failure % (N)                                                       | 7.00% (95)         | 0.60% (22)         | <0.0001 | 12.5% (145)        | 1.80% (53)         | <0.0001 | 12.3% (133)        | 1.30% (33)         | <0.0001 |
| Chronic kidney disease % (N)                                                         | 34.7% (471)        | 14.6% (516)        | <0.0001 | 43.0% (498)        | 26.7% (773)        | <0.0001 | 41.7% (450)        | 26.9% (665)        | <0.0001 |
| Kidney Failure % (N)                                                                 | 2.10% (29)         | 0.70% (25)         | <0.0001 | 3.10% (36)         | 1.00% (28)         | <0.0001 | 6.60% (71)         | 3.30% (82)         | <0.0001 |
| <i><u>Incident cardio-renal complications during follow-up (without history)</u></i> |                    |                    |         |                    |                    |         |                    |                    |         |
| Coronary heart disease % (N)                                                         | 63.5% (863)        | 0.00% (0)          | <0.0001 | 13.4% (155)        | 0.00% (0)          | <0.0001 | 11.3% (122)        | 0.00% (0)          | <0.0001 |
| Myocardial infarction % (N)                                                          | 27.5% (373)        | 0.00% (0)          | <0.0001 | 9.30% (106)        | 0.00% (0)          | <0.0001 | 5.40% (55)         | 0.00% (0)          | <0.0001 |
| Peripheral vascular disease (N)                                                      | 16.0% (217)        | 0.00% (0)          | <0.0001 | 2.80% (32)         | 0.00% (0)          | <0.0001 | 1.90% (20)         | 0.00% (0)          | <0.0001 |
| Stroke % (N)                                                                         | 6.80% (92)         | 0.00% (0)          | <0.0001 | 1.50% (17)         | 0.00% (0)          | <0.0001 | 1.30% (14)         | 0.00% (0)          | <0.0001 |
| Cardiovascular diseases % (N)                                                        | 56.6% (769)        | 0.00% (0)          | <0.0001 | 10.8% (125)        | 0.00% (0)          | <0.0001 | 9.30% (100)        | 0.00% (0)          | <0.0001 |
| Congestive heart failure % (N)                                                       | 25.4% (345)        | 6.00% (213)        | <0.0001 | 4.40% (51)         | 1.10% (33)         | <0.0001 | 1.80% (19)         | 0.60% (15)         | 0.0012  |
| Chronic kidney disease % (N)                                                         | 43.2% (586)        | 32.6% (1,149)      | <0.0001 | 10.9% (126)        | 9.00% (260)        | 0.0634  | 7.00% (75)         | 6.50% (160)        | 0.5938  |
| Kidney Failure % (N)                                                                 | 24.2% (328)        | 10.3% (363)        | <0.0001 | 7.00% (81)         | 3.90% (114)        | <0.0001 | 3.30% (36)         | 2.40% (60)         | 0.1235  |

Data were expressed as mean ± SD or median (Q1-Q3). Between-group comparisons were performed by chi-squared test for categorical variables, and unpaired Student's t-test or the Wilcoxon Rank Sum test for continuous variables.

**Supplementary Table S2.** Clinical characteristics for the European patients with type 2 diabetes included in the FIELD study and stratified by the status of coronary heart disease (Replication I study).

| Phenotype                                                | CHD status in the FIELD Study               |                    |         |
|----------------------------------------------------------|---------------------------------------------|--------------------|---------|
|                                                          | Replication I cohort                        |                    |         |
|                                                          | Enrolment year: 1998 - 2000                 |                    |         |
|                                                          | Genotyping platform: Affymetrix Axiom Array |                    |         |
|                                                          | Yes (n = 764)                               | No (n = 4276)      | P       |
| <i>Clinical characteristics at baseline</i>              |                                             |                    |         |
| Male % (N)                                               | 78.8% (602)                                 | 59.6% (2,547)      | <0.0001 |
| Age (years)                                              | 64.4 ± 6.50                                 | 62.0 ± 6.90        | <0.0001 |
| Age Onset (years)                                        | 56.3 ± 8.70                                 | 55.9 ± 8.10        | 0.2515  |
| Duration of diabetes (years)                             | 6.00 (3.00 - 12.0)                          | 4.00 (2.00 - 9.00) | <0.0001 |
| Follow-up time (years) <sup>a</sup>                      | 5.33 (4.77 - 6.01)                          | 5.01 (4.74 - 5.77) | <0.0001 |
| Smoking status % (N)                                     |                                             |                    | <0.0001 |
| Non-smoker                                               | 30.0% (229)                                 | 40.2% (1,718)      |         |
| Ex-smoker                                                | 58.2% (445)                                 | 51.1% (2,185)      |         |
| Current smoker                                           | 11.8% (90)                                  | 8.70% (373)        |         |
| Body height (m)                                          | 171.1 ± 8.60                                | 169.1 ± 9.40       | <0.0001 |
| Body weight (kg)                                         | 88.3 ± 16.4                                 | 88.1 ± 17.4        | 0.8060  |
| BMI (kg/m <sup>2</sup> )                                 | 30.2 ± 5.10                                 | 30.8 ± 5.80        | 0.0023  |
| Waist circumference (cm)                                 |                                             |                    |         |
| Males                                                    | 105.3 ± 12.2                                | 105.3 ± 12.6       | 0.9107  |
| Females                                                  | 102.5 ± 14.2                                | 101.3 ± 14.2       | 0.3111  |
| Hip circumference (cm)                                   | 110.4 ± 11.7                                | 111.7 ± 12.5       | 0.0080  |
| Waist-hip-ratio                                          | 0.90 ± 0.10                                 | 0.90 ± 0.10        | <0.0001 |
| HbA <sub>1c</sub> (%)                                    | 7.00 (6.20 - 7.90)                          | 6.70 (6.00 - 7.60) | <0.0001 |
| Total cholesterol (mmol/l)                               | 5.00 (4.50 - 5.50)                          | 5.10 (4.60 - 5.60) | 0.1666  |
| Triglycerides (mmol/l)                                   | 1.80 (1.40 - 2.50)                          | 1.70 (1.30 - 2.30) | 0.0530  |
| HDL-cholesterol (mmol/l)                                 | 1.00 (0.80 - 1.10)                          | 1.10 (0.90 - 1.20) | <0.0001 |
| LDL-cholesterol (mmol/l)                                 | 3.10 (2.70 - 3.60)                          | 3.10 (2.60 - 3.60) | 0.5265  |
| Systolic blood pressure (mmHg)                           | 141.1 ± 15.1                                | 139.0 ± 14.6       | 0.0002  |
| Diastolic blood pressure (mmHg)                          | 80.9 ± 8.80                                 | 81.4 ± 8.30        | 0.1069  |
| Albumin-creatinine-ratio (mg/mmol)                       | 1.60 (0.80 - 5.30)                          | 1.00 (0.60 - 2.60) | <0.0001 |
| eGFR (min/ml per 1.73 m <sup>2</sup> )                   | 81.2 ± 14.5                                 | 86.1 ± 14.0        | <0.0001 |
| <i>Treatment at baseline</i>                             |                                             |                    |         |
| Lipid lowering % (N)†                                    | 0.30% (2)                                   | 0.00% (2)          | 0.1115  |
| Blood pressure anti-hypertensive % (N)                   | 68.7% (525)                                 | 55.1% (2,358)      | <0.0001 |
| ACE inhibitor % (N)                                      | 38.2% (292)                                 | 32.9% (1,405)      | 0.0039  |
| Oral glucose lowering % (N)                              | 63.7% (487)                                 | 60.1% (2,572)      | 0.0610  |
| Insulin treatment % (N)                                  | 18.2% (139)                                 | 9.60% (410)        | <0.0001 |
| <i>History of cardio-renal complications at baseline</i> |                                             |                    |         |
| Coronary heart disease % (N)                             | 46.6% (356)                                 | 0.00% (2)          | <0.0001 |
| Myocardial infarction % (N)                              | 32.2% (246)                                 | 0.00% (2)          | <0.0001 |

|                                                                                      |             |             |         |
|--------------------------------------------------------------------------------------|-------------|-------------|---------|
| Peripheral vascular disease (N)                                                      | 17.3% (132) | 6.40% (274) | <0.0001 |
| Stroke % (N)                                                                         | 6.00% (46)  | 3.00% (128) | <0.0001 |
| Cardiovascular diseases % (N)                                                        | 60.2% (460) | 14.3% (610) | <0.0001 |
| Congestive heart failure % (N)                                                       | 6.80% (52)  | 1.90% (82)  | <0.0001 |
| Chronic kidney disease % (N) <sup>b</sup>                                            | 9.40% (72)  | 4.90% (211) | <0.0001 |
| Kidney Failure % (N) <sup>c †</sup>                                                  | 0.10% (1)   | 0.02% (1)   | 0.2802  |
| <i><u>Incident cardio-renal complications during follow-up (without history)</u></i> |             |             |         |
| Coronary heart disease % (N) <sup>d</sup>                                            | 66.6% (509) | 0.0% (0)    | <0.0001 |
| Coronary heart disease (first ever) % (N)                                            | 53.4% (408) | 0.0% (0)    | <0.0001 |
| Myocardial infarction % (N) <sup>e</sup>                                             | 27.9% (213) | 0.0% (0)    | <0.0001 |
| Myocardial infarction (first ever) % (N)                                             | 23.7% (181) | 0.0% (0)    | <0.0001 |
| Peripheral vascular disease % (N) <sup>f</sup>                                       | 5.8% (44)   | 1.7% (73)   | <0.0001 |
| Peripheral vascular disease (first ever) % (N)                                       | 2.7% (21)   | 0.9% (40)   | <0.0001 |
| Stroke % (N) <sup>g</sup>                                                            | 6.3% (48)   | 2.6% (111)  | <0.0001 |
| Stroke (first ever) % (N)                                                            | 5.4% (41)   | 2.3% (99)   | <0.0001 |
| Cardiovascular diseases % (N) <sup>h</sup>                                           | 68.2% (521) | 3.1% (131)  | <0.0001 |
| Cardiovascular diseases (first ever) % (N)                                           | 39.8% (304) | 2.1% (90)   | <0.0001 |
| Congestive heart failure % (N) <sup>i</sup>                                          | 7.9% (60)   | 1.3% (55)   | <0.0001 |
| Congestive heart failure (first ever) % (N)                                          | 5.9% (45)   | 1.1% (46)   | <0.0001 |
| Chronic kidney disease % (N) <sup>j</sup>                                            | 11.9% (91)  | 3.9% (168)  | <0.0001 |
| Chronic kidney disease (first ever) % (N)                                            | 7.6% (58)   | 3.0% (129)  | <0.0001 |
| Kidney Failure % (N) <sup>k</sup>                                                    | 6.0% (46)   | 1.5% (64)   | <0.0001 |
| Kidney Failure (first ever) % (N)                                                    | 5.9% (45)   | 1.5% (63)   | <0.0001 |

Data were expressed as mean  $\pm$  SD or median (Q1-Q3). Between-group comparisons were performed by chi-squared test for categorical variables, and unpaired Student's t-test or the Wilcoxon Rank Sum test for continuous variables.

† Between-group comparisons were performed by Fisher exact test.

<sup>a</sup> Follow-up time was calculated using a reverse Kaplan-Meier approach,

<sup>b</sup> eGFR<60 or ICD-10 code indicating renal failure/disease prior to visit 3 (active run-in period),

<sup>c</sup> eGFR<30 or ICD-10 code indicating renal failure prior to visit 3 (active run-in period),

<sup>d</sup> Includes 101 that also had coronary heart disease at baseline

<sup>e</sup> Includes 32 that had a MI prior to the study

<sup>f</sup> Includes 56 with history of peripheral vascular disease prior to the study

<sup>g</sup> Includes 19 that had a stroke prior to the study

<sup>h</sup> Includes 258 with cardiovascular disease prior to the study

<sup>i</sup> Includes 24 with CHF prior to randomisation

<sup>j</sup> Includes 72 with chronic kidney disease at baseline

<sup>k</sup> Includes 2 patients with kidney failure diagnosed prior to randomisation.

**Supplementary Table S3.** Associations of lead variants from 13 novel loci with coronary heart disease in Chinese patients with type 2 diabetes.

|              |     |                        |                       |            |                           | Cohort for genome-wide scan:<br>HKDR Study<br>(1358 cases vs 3528 controls) |                    |                    |         | Cohort for genome-wide scan:<br>HKDB Phase 1 Study<br>(1159 cases vs 2896 controls) |                    |                    |         |
|--------------|-----|------------------------|-----------------------|------------|---------------------------|-----------------------------------------------------------------------------|--------------------|--------------------|---------|-------------------------------------------------------------------------------------|--------------------|--------------------|---------|
|              |     |                        |                       |            |                           | RAF in<br>cases                                                             | RAF in<br>controls | OR (95% CI)        | P       | RAF in<br>cases                                                                     | RAF in<br>controls | OR (95% CI)        | P       |
| SNP          | Chr | Position<br>(Build 37) | Nearest genes         | Function   | Risk/<br>other<br>alleles |                                                                             |                    |                    |         |                                                                                     |                    |                    |         |
| rs145306069* | 1   | 203765163              | <i>ZC3H11A</i>        | intronic   | T/C                       | 0.358                                                                       | 0.320              | 1.19 (1.08 - 1.31) | 4.0E-04 | 0.354                                                                               | 0.310              | 1.21 (1.09 - 1.35) | 4.9E-04 |
| rs3770911*   | 2   | 36638473               | <i>CRIM1</i>          | intronic   | G/A                       | 0.155                                                                       | 0.140              | 1.11 (0.98 - 1.25) | 0.1156  | 0.192                                                                               | 0.154              | 1.40 (1.22 - 1.60) | 1.2E-06 |
| rs13410259*  | 2   | 183340241              | <i>PDE1A</i>          | intronic   | C/A                       | 0.793                                                                       | 0.758              | 1.22 (1.09 - 1.36) | 4.2E-04 | 0.787                                                                               | 0.752              | 1.26 (1.12 - 1.43) | 2.1E-04 |
| rs10171703†  | 2   | 183343102              | <i>PDE1A</i>          | intronic   | C/T                       | 0.793                                                                       | 0.758              | 1.22 (1.09 - 1.35) | 4.3E-04 | 0.787                                                                               | 0.752              | 1.26 (1.12 - 1.43) | 2.2E-04 |
| rs143122158* | 3   | 22824243               | <i>RP11-1037D22.1</i> | intergenic | C/T                       | 0.018                                                                       | 0.011              | 2.01 (1.30 - 3.11) | 1.6E-03 | 0.023                                                                               | 0.016              | 1.94 (1.28 - 2.95) | 1.9E-03 |
| rs62336633*  | 4   | 111236309              | <i>ZBED1P1</i>        | intergenic | A/G                       | 0.235                                                                       | 0.209              | 1.19 (1.07 - 1.33) | 1.8E-03 | 0.251                                                                               | 0.221              | 1.28 (1.12 - 1.46) | 3.7E-04 |
| rs41377244*  | 5   | 124669572              | <i>RN7SKP117</i>      | intergenic | T/C                       | 0.961                                                                       | 0.946              | 1.44 (1.15 - 1.81) | 1.5E-03 | 0.938                                                                               | 0.924              | 1.65 (1.23 - 2.20) | 7.2E-04 |
| rs7029336*   | 9   | 4747340                | <i>AK3</i>            | intergenic | A/C                       | 0.188                                                                       | 0.165              | 1.17 (1.04 - 1.31) | 0.0106  | 0.190                                                                               | 0.152              | 1.36 (1.19 - 1.55) | 4.8E-06 |
| rs2004294*   | 9   | 20235881               | <i>AL512635.1</i>     | intergenic | A/C                       | 0.751                                                                       | 0.715              | 1.23 (1.11 - 1.36) | 8.0E-05 | 0.702                                                                               | 0.675              | 1.16 (1.03 - 1.30) | 0.0123  |
| rs6491536*   | 13  | 100548455              | <i>CLYBL</i>          | UTR3       | C/A                       | 0.224                                                                       | 0.190              | 1.23 (1.10 - 1.38) | 2.2E-04 | 0.212                                                                               | 0.189              | 1.19 (1.05 - 1.35) | 6.3E-03 |
| rs12435989*  | 14  | 50470952               | <i>C14orf182</i>      | intronic   | G/T                       | 0.906                                                                       | 0.884              | 1.29 (1.11 - 1.50) | 1.1E-03 | 0.910                                                                               | 0.885              | 1.34 (1.13 - 1.58) | 7.0E-04 |
| rs4902371*   | 14  | 65619418               | <i>RNU2-14P</i>       | intergenic | G/T                       | 0.328                                                                       | 0.290              | 1.21 (1.10 - 1.33) | 1.5E-04 | 0.318                                                                               | 0.296              | 1.16 (1.03 - 1.30) | 0.0117  |
| rs305960*    | 19  | 41662968               | <i>RPL36P16</i>       | intergenic | G/A                       | 0.315                                                                       | 0.275              | 1.23 (1.11 - 1.35) | 4.9E-05 | 0.350                                                                               | 0.329              | 1.15 (1.01 - 1.30) | 0.0319  |
| rs4823994*   | 22  | 49495277               | <i>RPL35P8</i>        | intergenic | G/A                       | 0.772                                                                       | 0.739              | 1.19 (1.07 - 1.32) | 1.4E-03 | 0.755                                                                               | 0.719              | 1.28 (1.13 - 1.45) | 1.2E-04 |

Supplementary Table S3. Continued.

| SNP      Nearest genes |                       | Meta-analysis of two GWASs:<br>HKDR Study + HKDB Phase 1 Study<br>(2517 cases vs 6424 controls) |                          |                        |                         |         | Cohort for follow-up of top signals:<br>HKDB Phase 2 Study<br>(1079 cases vs 2474 controls) |                       |                    |          | Meta-analysis in Chinese patients with T2D:<br>HKDR Study + HKDB Phase 1 Study<br>+ HKDB Phase 2 Study<br>(3596 cases vs 8898 controls) |                          |                         |         |
|------------------------|-----------------------|-------------------------------------------------------------------------------------------------|--------------------------|------------------------|-------------------------|---------|---------------------------------------------------------------------------------------------|-----------------------|--------------------|----------|-----------------------------------------------------------------------------------------------------------------------------------------|--------------------------|-------------------------|---------|
|                        |                       | OR (95% CI)                                                                                     | <i>P</i> <sub>meta</sub> | <i>P</i> <sub>GC</sub> | <i>P</i> <sub>het</sub> | Effects | RAF<br>in<br>cases                                                                          | RAF<br>in<br>controls | OR (95% CI)        | <i>P</i> | OR (95% CI)                                                                                                                             | <i>P</i> <sub>meta</sub> | <i>P</i> <sub>het</sub> | Effects |
| rs145306069*           | <i>ZC3H11A</i>        | 1.20 (1.12 - 1.29)                                                                              | 6.9E-07                  | 7.7E-07                | 0.7919                  | ++      | 0.315                                                                                       | 0.307                 | 1.02 (0.90 - 1.16) | 0.7551   | 1.15 (1.08 - 1.23)                                                                                                                      | 8.1E-06                  | 0.0868                  | +++     |
| rs3770911*             | <i>CRIMI</i>          | 1.23 (1.12 - 1.35)                                                                              | 8.6E-06                  | 1.0E-05                | 0.0124                  | ++      | 0.148                                                                                       | 0.151                 | 1.00 (0.87 - 1.16) | 0.9858   | 1.16 (1.07 - 1.25)                                                                                                                      | 1.7E-04                  | 2.5E-03                 | +++     |
| rs13410259*            | <i>PDE1A</i>          | 1.24 (1.14 - 1.34)                                                                              | 3.5E-07                  | 3.9E-07                | 0.6544                  | ++      | 0.781                                                                                       | 0.751                 | 1.16 (1.03 - 1.32) | 0.0181   | 1.21 (1.13 - 1.30)                                                                                                                      | 2.7E-08                  | 0.6672                  | +++     |
| rs10171703†            | <i>PDE1A</i>          | 1.24 (1.14 - 1.34)                                                                              | 3.7E-07                  | 4.1E-07                | 0.6477                  | ++      | 0.791                                                                                       | 0.761                 | 1.17 (1.03 - 1.32) | 0.0154   | 1.21 (1.13 - 1.30)                                                                                                                      | 2.4E-08                  | 0.6777                  | +++     |
| rs143122158*           | <i>RP11-1037D22.1</i> | 1.98 (1.46 - 2.67)                                                                              | 9.5E-06                  | 1.0E-05                | 0.9053                  | ++      | 0.011                                                                                       | 0.014                 | 0.55 (0.29 - 1.04) | 0.0647   | 1.56 (1.19 - 2.05)                                                                                                                      | 1.4E-03                  | 1.7E-03                 | ++-     |
| rs62336633*            | <i>ZBED1P1</i>        | 1.22 (1.12 - 1.33)                                                                              | 3.0E-06                  | 3.3E-06                | 0.4357                  | ++      | 0.217                                                                                       | 0.223                 | 0.96 (0.84 - 1.11) | 0.5842   | 1.15 (1.07 - 1.23)                                                                                                                      | 2.0E-04                  | 0.0115                  | ++-     |
| rs41377244*            | <i>RN7SKP117</i>      | 1.52 (1.27 - 1.81)                                                                              | 4.6E-06                  | 5.1E-06                | 0.4811                  | ++      | 0.940                                                                                       | 0.943                 | 0.95 (0.76 - 1.18) | 0.6205   | 1.26 (1.10 - 1.45)                                                                                                                      | 1.1E-03                  | 3.9E-03                 | ++-     |
| rs7029336*             | <i>AK3</i>            | 1.25 (1.14 - 1.36)                                                                              | 7.1E-07                  | 8.3E-07                | 0.0901                  | ++      | 0.162                                                                                       | 0.165                 | 0.97 (0.84 - 1.12) | 0.6991   | 1.17 (1.08 - 1.26)                                                                                                                      | 5.1E-05                  | 3.7E-03                 | ++-     |
| rs2004294*             | <i>AL512635.1</i>     | 1.20 (1.11 - 1.29)                                                                              | 4.0E-06                  | 4.2E-06                | 0.4542                  | ++      | 0.695                                                                                       | 0.708                 | 0.91 (0.81 - 1.03) | 0.1446   | 1.11 (1.04 - 1.18)                                                                                                                      | 1.9E-03                  | 7.8E-04                 | ++-     |
| rs6491536*             | <i>CLYBL</i>          | 1.21 (1.12 - 1.32)                                                                              | 4.7E-06                  | 5.0E-06                | 0.6941                  | ++      | 0.187                                                                                       | 0.190                 | 0.99 (0.87 - 1.14) | 0.9075   | 1.15 (1.07 - 1.23)                                                                                                                      | 1.2E-04                  | 0.0415                  | ++-     |
| rs12435989*            | <i>C14orf182</i>      | 1.31 (1.17 - 1.46)                                                                              | 2.7E-06                  | 2.9E-06                | 0.7452                  | ++      | 0.892                                                                                       | 0.887                 | 1.01 (0.85 - 1.19) | 0.9288   | 1.21 (1.10 - 1.32)                                                                                                                      | 8.0E-05                  | 0.0368                  | +++     |
| rs4902371*             | <i>RNU2-14P</i>       | 1.19 (1.10 - 1.28)                                                                              | 6.2E-06                  | 6.5E-06                | 0.5896                  | ++      | 0.278                                                                                       | 0.291                 | 0.95 (0.84 - 1.07) | 0.3951   | 1.12 (1.05 - 1.19)                                                                                                                      | 6.3E-04                  | 7.5E-03                 | ++-     |
| rs305960*              | <i>RPL36P16</i>       | 1.19 (1.11 - 1.29)                                                                              | 6.3E-06                  | 6.5E-06                | 0.4025                  | ++      | 0.324                                                                                       | 0.305                 | 1.08 (0.95 - 1.22) | 0.2239   | 1.16 (1.09 - 1.24)                                                                                                                      | 7.6E-06                  | 0.2802                  | +++     |
| rs4823994*             | <i>RPL35P8</i>        | 1.23 (1.13 - 1.33)                                                                              | 8.1E-07                  | 9.1E-07                | 0.4003                  | ++      | 0.738                                                                                       | 0.753                 | 0.95 (0.84 - 1.07) | 0.3583   | 1.13 (1.06 - 1.21)                                                                                                                      | 3.5E-04                  | 1.4E-03                 | ++-     |

Nearest Entrez genes within 250 kb

\* represents the lead variant for each locus identified in the meta-analysis of GWASs

† represents the lead variant at *PDE1A* locus identified in the meta-analysis of all cohorts with Chinese patients with T2D

Odds ratios (ORs) were estimated according to the risk allele.

*P* represents the *p*-value obtained from individual cohort using the logistic regression model with the adjustments of sex, age and principal components

*P*<sub>meta</sub> represents the *p*-value obtained from the meta-analysis under a fixed effect model

*P*<sub>GC</sub> represents the *p*-value obtained from the meta-analysis under a fixed effect model after genomic control

*P*<sub>het</sub> represents the *p*-value obtained from the heterogeneity test (Cochran’s Q test)

RAF: Risk allele frequency



**Supplementary Table S4.** Associations of *PDE1A* rs10171703 with coronary heart disease in all discovery and replication cohorts.

| Cohort                                                          | Population                            | Covariates                                 | Imputation<br>quality<br>(Rsq) | N            |                        | Risk allele<br>frequency |                        | Association tests               |                              |                         |
|-----------------------------------------------------------------|---------------------------------------|--------------------------------------------|--------------------------------|--------------|------------------------|--------------------------|------------------------|---------------------------------|------------------------------|-------------------------|
|                                                                 |                                       |                                            |                                | CHD<br>case  | Non-<br>CHD<br>control | CHD<br>case              | Non-<br>CHD<br>control | OR (95% CI) /<br>HR (95% CI)    | <i>P</i> <sub>additive</sub> | <i>P</i> <sub>het</sub> |
| <i>Genome-wide scan</i>                                         |                                       |                                            |                                |              |                        |                          |                        |                                 |                              |                         |
| HKDR Study                                                      | Chinese T2D patients                  | sex, age, and PCs                          | 1.0000                         | 1,358        | 3,528                  | 0.793                    | 0.758                  | 1.22 (1.09 - 1.35)              | 4.3×10 <sup>-4</sup>         | --                      |
| HKDB Phase 1 Study                                              | Chinese T2D patients                  | sex, age, and PCs                          | 0.9036                         | 1,159        | 2,896                  | 0.787                    | 0.752                  | 1.26 (1.12 - 1.43)              | 2.2×10 <sup>-4</sup>         | --                      |
| <b>Meta-analysis of two GWASs</b>                               | <b>Chinese T2D patients</b>           | --                                         | --                             | <b>2,517</b> | <b>6,424</b>           | --                       | --                     | <b>1.24 (1.14 - 1.34)</b>       | <b>3.7×10<sup>-7</sup></b>   | <b>0.6477</b>           |
| <i>Follow-up of top signals</i>                                 |                                       |                                            |                                |              |                        |                          |                        |                                 |                              |                         |
| HKDB Phase 2 Study                                              | Chinese T2D patients                  | sex, age, and PCs                          | 0.9997                         | 1,079        | 2,474                  | 0.791                    | 0.761                  | 1.17 (1.03 - 1.32)              | 0.0154                       | --                      |
| <b>Meta-analysis in Chinese patients with T2D</b>               | <b>Chinese T2D patients</b>           | --                                         | --                             | <b>3,596</b> | <b>8,898</b>           | --                       | --                     | <b>1.21 (1.13 - 1.30)</b>       | <b>2.4×10<sup>-8</sup></b>   | <b>0.6777</b>           |
| <i>Replication I</i>                                            |                                       |                                            |                                |              |                        |                          |                        |                                 |                              |                         |
| FIELD Study                                                     | European T2D patients                 | sex, age, duration of<br>diabetes, and PCs | 0.9995                         | 764          | 4,276                  | 0.523                    |                        | 0.97 (0.82 - 1.14) <sup>†</sup> | 0.6879 <sup>§</sup>          | --                      |
| <i>Replication II</i>                                           |                                       |                                            |                                |              |                        |                          |                        |                                 |                              |                         |
| Biobank Japan (BBJ) Project (Ishigaki <i>et al.</i> 2020) [1]   | Japanese from general<br>populations  | sex, age, and PCs                          | 0.9999                         | 29,319       | 183,134                | 0.726                    | 0.724                  | 1.02 (1.00 - 1.05)              | 0.0214                       | --                      |
| Biobank Japan (BBJ) Project (Koyama <i>et al.</i> 2020) [2]     | Japanese from general<br>populations  | sex, age, and PCs                          | >0.3                           | 25,892       | 142,336                | 0.723                    |                        | 1.02 (1.00 - 1.04)              | 0.1026                       | --                      |
| GWAS in two Japanese Cohorts (Matsunaga <i>et al.</i> 2020) [3] | Japanese from general<br>populations  | sex, age, and PCs                          | 0.9999                         | 15,302       | 36,140                 | --                       | --                     | 1.07 (1.03 - 1.12)              | 1.3×10 <sup>-3</sup>         | 0.4396                  |
| CARDIoGRAMplusC4D Consortium and UK<br>Biobank [4]              | Europeans from general<br>populations | sex, age, and PCs                          | --                             | 122,733      | 424,528                | 0.510                    |                        | 1.01 (1.00 - 1.02)              | 0.0716                       | 0.7411                  |
| FinnGEN Project [5]                                             | Europeans from general<br>populations | sex, age, PCs, and<br>genotyping batch     | info score<br>>0.95            | 21,012       | 197,780                | 0.485                    | 0.479                  | 1.04 (1.01 - 1.07)              | 3.3×10 <sup>-3</sup>         | --                      |
| Joint T2D-CHD GWAS and<br>CARDIoGRAMplusC4D [6, 7]              | Multi-ethnic general<br>populations   | --                                         | --                             | 90,831       | 169,534                | --                       | --                     | 1.02 (0.99 - 1.04)              | 0.1854                       | --                      |

All study cohorts used the case-control study design, except the FIELD study which is a prospective cohort.

ORs and 95% CIs were reported according to the CHD-related risk allele (C-allele) of *PDE1A* rs10171703

<sup>†</sup> HR and 95% CIs were reported according to the CHD-related risk allele (C-allele) of *PDE1A* rs10171703

*P<sub>additive</sub>* was obtained from either the logistic regression model with the adjustments of covariates, or the meta-analysis under a fixed effect model

<sup>§</sup> *P<sub>additive</sub>* was obtained from the Cox regression model with the adjustments of covariates

*P<sub>het</sub>* refers to the *p*-value obtained from the heterogeneity test (Cochran's Q test)

PCs: Principal components

Part of the samples included in the Matsunaga *et al.* 2020 Study were recruited from the Biobank Japan Project (n = 12,494 cases and 7,261 controls)

Analysis of the Joint T2D-CHD GWAS included samples from the CARDIoGRAMplusC4D Consortium

## References:

- [1] Ishigaki K, Akiyama M, Kanai M *et al.* Large-scale genome-wide association study in a Japanese population identifies novel susceptibility loci across different diseases. *Nat Genet.* 2020 Jul;52(7):669-679.
- [2] Koyama S, Ito K, Terao C *et al.* Population-specific and trans-ancestry genome-wide analyses identify distinct and shared genetic risk loci for coronary artery disease. *Nat Genet.* 2020 Nov;52(11):1169-1177.
- [3] Matsunaga H, Ito K, Akiyama M *et al.* Transethnic Meta-Analysis of Genome-Wide Association Studies Identifies Three New Loci and Characterizes Population-Specific Differences for Coronary Artery Disease. *Circ Genom Precis Med.* 2020 Jun;13(3):e002670.
- [4] van der Harst P, Verweij N. Identification of 64 Novel Genetic Loci Provides an Expanded View on the Genetic Architecture of Coronary Artery Disease. *Circ Res.* 2018 Feb 2;122(3):433-443.
- [5] Kurki MI, Karjalainen J, Palta P *et al.* FinnGen: Unique genetic insights from combining isolated population and national health register data. *medRxiv* 2022:2022.2003.2003.22271360
- [6] Zhao W, Rasheed A, Tikkanen E *et al.* Identification of new susceptibility loci for type 2 diabetes and shared etiological pathways with coronary heart disease. *Nat Genet.* 2017 Oct;49(10):1450-1457.
- [7] <https://kp4cd.org/node/207>

**Supplementary Table S5.** Sensitivity analysis for the association of *PDE1A* rs10171703 with the risk of coronary heart disease in Chinese patients with type 2 diabetes, with different covariates adjustments.

| Covariates                                                                                                                                         | Cohort               | Case<br><i>N</i> | Control<br><i>N</i> | OR (95% CI)               | <i>P</i> <sub>additive</sub> | <i>P</i> <sub>het</sub> |
|----------------------------------------------------------------------------------------------------------------------------------------------------|----------------------|------------------|---------------------|---------------------------|------------------------------|-------------------------|
| PCs, sex, age                                                                                                                                      | HKDR Study           | 1358             | 3528                | 1.22 (1.09 - 1.35)        | 4.3×10 <sup>-4</sup>         | --                      |
|                                                                                                                                                    | HKDB Phase 1 Study   | 1159             | 2896                | 1.26 (1.12 - 1.43)        | 2.2×10 <sup>-4</sup>         | --                      |
|                                                                                                                                                    | HKDB Phase 2 Study   | 1079             | 2474                | 1.17 (1.03 - 1.32)        | 0.0154                       | --                      |
|                                                                                                                                                    | <b>Meta-analysis</b> | <b>3596</b>      | <b>8898</b>         | <b>1.21 (1.13 - 1.30)</b> | <b>2.4×10<sup>-8</sup></b>   | <b>0.6777</b>           |
| PCs, sex, age, duration of diabetes                                                                                                                | HKDR Study           | 1357             | 3528                | 1.21 (1.08 - 1.35)        | 7.0×10 <sup>-4</sup>         | --                      |
|                                                                                                                                                    | HKDB Phase 1 Study   | 1152             | 2896                | 1.24 (1.09 - 1.39)        | 6.1×10 <sup>-4</sup>         | --                      |
|                                                                                                                                                    | HKDB Phase 2 Study   | 1071             | 2474                | 1.19 (1.05 - 1.36)        | 6.4×10 <sup>-3</sup>         | --                      |
|                                                                                                                                                    | <b>Meta-analysis</b> | <b>3580</b>      | <b>8898</b>         | <b>1.21 (1.13 - 1.30)</b> | <b>3.3×10<sup>-8</sup></b>   | <b>0.9294</b>           |
| PCs, sex, age, duration of diabetes, smoking status                                                                                                | HKDR Study           | 1356             | 3520                | 1.21 (1.09 - 1.36)        | 6.5×10 <sup>-4</sup>         | --                      |
|                                                                                                                                                    | HKDB Phase 1 Study   | 1152             | 2895                | 1.23 (1.09 - 1.39)        | 8.0×10 <sup>-4</sup>         | --                      |
|                                                                                                                                                    | HKDB Phase 2 Study   | 1071             | 2470                | 1.19 (1.05 - 1.35)        | 8.2×10 <sup>-3</sup>         | --                      |
|                                                                                                                                                    | <b>Meta-analysis</b> | <b>3579</b>      | <b>8885</b>         | <b>1.21 (1.13 - 1.30)</b> | <b>5.0×10<sup>-8</sup></b>   | <b>0.9256</b>           |
| PCs, sex, age, duration of diabetes, smoking status, obesity (BMI, waist-hip-ratio)                                                                | HKDR Study           | 1341             | 3507                | 1.18 (1.05 - 1.32)        | 4.2×10 <sup>-3</sup>         | --                      |
|                                                                                                                                                    | HKDB Phase 1 Study   | 991              | 2643                | 1.20 (1.05 - 1.37)        | 6.0×10 <sup>-3</sup>         | --                      |
|                                                                                                                                                    | HKDB Phase 2 Study   | 824              | 1986                | 1.22 (1.05 - 1.41)        | 7.1×10 <sup>-3</sup>         | --                      |
|                                                                                                                                                    | <b>Meta-analysis</b> | <b>3156</b>      | <b>8136</b>         | <b>1.20 (1.11 - 1.29)</b> | <b>1.7×10<sup>-6</sup></b>   | <b>0.9470</b>           |
| PCs, sex, age, duration of diabetes, smoking status, obesity, hypertension (systolic and diastolic blood pressure, use of anti-hypertensive drugs) | HKDR Study           | 1341             | 3504                | 1.14 (1.01 - 1.28)        | 0.0361                       | --                      |
|                                                                                                                                                    | HKDB Phase 1 Study   | 980              | 2602                | 1.18 (1.03 - 1.35)        | 0.0147                       | --                      |
|                                                                                                                                                    | HKDB Phase 2 Study   | 818              | 1964                | 1.20 (1.04 - 1.39)        | 0.0129                       | --                      |
|                                                                                                                                                    | <b>Meta-analysis</b> | <b>3139</b>      | <b>8070</b>         | <b>1.17 (1.08 - 1.26)</b> | <b>5.9×10<sup>-5</sup></b>   | <b>0.8201</b>           |
| PCs, sex, age, duration of diabetes, smoking status, obesity, hypertension, glycaemic control (HbA1c,                                              | HKDR Study           | 1341             | 3504                | 1.13 (1.01 - 1.28)        | 0.0381                       | --                      |

|                                                                                                                                                                                                  |                      |             |             |                           |                            |               |
|--------------------------------------------------------------------------------------------------------------------------------------------------------------------------------------------------|----------------------|-------------|-------------|---------------------------|----------------------------|---------------|
| use of oral glucose lowering drugs, insulin treatment)                                                                                                                                           | HKDB Phase 1 Study   | 422         | 1021        | 1.12 (0.90 - 1.38)        | 0.3139                     | --            |
|                                                                                                                                                                                                  | HKDB Phase 2 Study   | 705         | 1695        | 1.17 (1.00 - 1.37)        | 0.0544                     | --            |
|                                                                                                                                                                                                  | <b>Meta-analysis</b> | <b>2468</b> | <b>6220</b> | <b>1.14 (1.05 - 1.25)</b> | <b>2.9×10<sup>-3</sup></b> | <b>0.9332</b> |
| PCs, sex, age, duration of diabetes, smoking status, obesity, hypertension, glycaemic control, dyslipidemia (triglyceride levels, HDL cholesterol, LDL cholesterol, use of lipid lowering drugs) | HKDR Study           | 1265        | 3354        | 1.15 (1.02 - 1.31)        | 0.0271                     | --            |
|                                                                                                                                                                                                  | HKDB Phase 1 Study   | 414         | 989         | 1.15 (0.92 - 1.44)        | 0.2123                     | --            |
|                                                                                                                                                                                                  | HKDB Phase 2 Study   | 693         | 1632        | 1.17 (0.99 - 1.38)        | 0.0649                     | --            |
|                                                                                                                                                                                                  | <b>Meta-analysis</b> | <b>2372</b> | <b>5975</b> | <b>1.16 (1.06 - 1.27)</b> | <b>1.7×10<sup>-3</sup></b> | <b>0.9914</b> |
| PCs, sex, age, duration of diabetes, smoking status, obesity, hypertension, glycaemic control, dyslipidemia, renal function (albumin-creatinine-ratio, eGFR)                                     | HKDR Study           | 1223        | 3214        | 1.15 (1.01 - 1.31)        | 0.0368                     | --            |
|                                                                                                                                                                                                  | HKDB Phase 1 Study   | 380         | 840         | 1.11 (0.88 - 1.40)        | 0.3664                     | --            |
|                                                                                                                                                                                                  | HKDB Phase 2 Study   | 588         | 1393        | 1.19 (0.99 - 1.42)        | 0.0614                     | --            |
|                                                                                                                                                                                                  | <b>Meta-analysis</b> | <b>2191</b> | <b>5447</b> | <b>1.15 (1.05 - 1.27)</b> | <b>3.6×10<sup>-3</sup></b> | <b>0.9104</b> |

Association between *PDE1A* rs10171703 and CHD risk was assessed by logistic regression with adjustments for different covariates measured at baseline.

Results obtained from the individual cohorts were meta-analysed under a fixed effect model

ORs and 95% CIs were reported according to the CHD-related risk allele (C-allele) of *PDE1A* rs10171703

$P_{het}$  refers to the  $p$ -value obtained from the heterogeneity test (Cochran's Q test)

PC: Principal components

**Supplementary Table S6.** Associations of *PDE1A* rs10171703 with the risks of cardio-renal complications in Chinese patients with type 2 diabetes.

| Diabetic complication      Cohort         |                    | Case-control analysis |              |       |         |                           |                              |                         | Prospective analysis |               |       |           |                           |                              |                         |
|-------------------------------------------|--------------------|-----------------------|--------------|-------|---------|---------------------------|------------------------------|-------------------------|----------------------|---------------|-------|-----------|---------------------------|------------------------------|-------------------------|
|                                           |                    | <i>N</i>              |              | RAF   |         | Logistic regression       |                              |                         | <i>N</i>             |               | RAF   |           | Cox regression            |                              |                         |
|                                           |                    | Case                  | Control      | Case  | Control | OR (95% CI)               | <i>P</i> <sub>additive</sub> | <i>P</i> <sub>het</sub> | Event                | Non-event     | Event | Non-event | HR (95% CI)               | <i>P</i> <sub>additive</sub> | <i>P</i> <sub>het</sub> |
| CHD                                       | HKDR study         | 1,358                 | 3,528        | 0.793 | 0.758   | 1.22 (1.09 - 1.35)        | 4.3×10 <sup>-4</sup>         | --                      | 862                  | 4,648         | 0.789 | 0.761     | 1.14 (1.01 - 1.28)        | 0.0270                       | --                      |
|                                           | HKDB phase 1 study | 1,159                 | 2,896        | 0.787 | 0.752   | 1.26 (1.12 - 1.43)        | 2.2×10 <sup>-4</sup>         | --                      | 155                  | 4,927         | 0.817 | 0.772     | 1.38 (1.03 - 1.85)        | 0.0296                       | --                      |
|                                           | HKDB phase 2 study | 1,079                 | 2,474        | 0.791 | 0.761   | 1.17 (1.03 - 1.32)        | 0.0154                       | --                      | 122                  | 4,600         | 0.770 | 0.773     | 0.96 (0.72 - 1.29)        | 0.8003                       | --                      |
|                                           | Meta-analysis      | <b>3,596</b>          | <b>8,898</b> | --    | --      | <b>1.21 (1.13 - 1.30)</b> | <b>2.4×10<sup>-8</sup></b>   | <b>0.6777</b>           | <b>1,139</b>         | <b>14,175</b> | --    | --        | <b>1.14 (1.03 - 1.27)</b> | <b>9.3×10<sup>-3</sup></b>   | <b>0.2315</b>           |
| MI                                        | HKDR study         | 861                   | 3,528        | 0.789 | 0.758   | 1.19 (1.04 - 1.35)        | 9.0×10 <sup>-3</sup>         | --                      | 420                  | 5,435         | 0.779 | 0.767     | 1.05 (0.90 - 1.24)        | 0.5279                       | --                      |
|                                           | HKDB phase 1 study | 340                   | 2,880        | 0.794 | 0.751   | 1.36 (1.10 - 1.67)        | 4.1×10 <sup>-3</sup>         | --                      | 106                  | 5,702         | 0.827 | 0.775     | 1.46 (1.02 - 2.10)        | 0.0406                       | --                      |
|                                           | HKDB phase 2 study | 282                   | 2,359        | 0.796 | 0.762   | 1.19 (0.96 - 1.48)        | 0.1199                       | --                      | 55                   | 5,155         | 0.791 | 0.775     | 1.08 (0.68 - 1.71)        | 0.7473                       | --                      |
|                                           | Meta-analysis      | <b>1,483</b>          | <b>8,767</b> | --    | --      | <b>1.22 (1.11 - 1.35)</b> | <b>5.5×10<sup>-5</sup></b>   | <b>0.5413</b>           | <b>581</b>           | <b>16,292</b> | --    | --        | <b>1.11 (0.96 - 1.28)</b> | <b>0.1489</b>                | <b>0.2711</b>           |
| Any stroke                                | HKDR study         | 887                   | 3,528        | 0.783 | 0.758   | 1.15 (1.02 - 1.31)        | 0.0270                       | --                      | 741                  | 5,119         | 0.788 | 0.766     | 1.10 (0.98 - 1.25)        | 0.1160                       | --                      |
|                                           | HKDB phase 1 study | 636                   | 2,896        | 0.788 | 0.765   | 1.14 (0.98 - 1.32)        | 0.0806                       | --                      | 118                  | 5,444         | 0.797 | 0.776     | 1.13 (0.82 - 1.55)        | 0.4503                       | --                      |
|                                           | HKDB phase 2 study | 559                   | 2,474        | 0.781 | 0.761   | 1.10 (0.94 - 1.28)        | 0.2448                       | --                      | 82                   | 5,121         | 0.831 | 0.776     | 1.40 (0.93 - 2.10)        | 0.1045                       | --                      |
|                                           | Meta-analysis      | <b>2,082</b>          | <b>8,898</b> | --    | --      | <b>1.13 (1.04 - 1.23)</b> | <b>2.6×10<sup>-3</sup></b>   | <b>0.8894</b>           | <b>941</b>           | <b>15,684</b> | --    | --        | <b>1.13 (1.01 - 1.26)</b> | <b>0.0343</b>                | <b>0.5507</b>           |
| Any stroke<br>(excluded any<br>CHD cases) | HKDR study         | 624                   | 3,528        | 0.782 | 0.758   | 1.15 (0.99 - 1.32)        | 0.0659                       | --                      | 524                  | 4,024         | 0.790 | 0.758     | 1.18 (1.02 - 1.37)        | 0.0283                       | --                      |
|                                           | HKDB phase 1 study | 465                   | 2,896        | 0.788 | 0.765   | 1.14 (0.97 - 1.35)        | 0.1182                       | --                      | 86                   | 4,464         | 0.791 | 0.770     | 1.13 (0.78 - 1.63)        | 0.5105                       | --                      |
|                                           | HKDB phase 2 study | 408                   | 2,474        | 0.780 | 0.761   | 1.09 (0.92 - 1.31)        | 0.3214                       | --                      | 62                   | 4,200         | 0.817 | 0.773     | 1.28 (0.82 - 2.01)        | 0.2791                       | --                      |
|                                           | Meta-analysis      | <b>1,497</b>          | <b>8,898</b> | --    | --      | <b>1.13 (1.03 - 1.24)</b> | <b>0.0100</b>                | <b>0.9144</b>           | <b>672</b>           | <b>12,688</b> | --    | --        | <b>1.18 (1.04 - 1.35)</b> | <b>0.0126</b>                | <b>0.9125</b>           |
| PVD                                       | HKDR study         | 631                   | 3,528        | 0.784 | 0.758   | 1.15 (0.99 - 1.33)        | 0.0632                       | --                      | 260                  | 5,374         | 0.788 | 0.767     | 1.12 (0.91 - 1.39)        | 0.2757                       | --                      |
|                                           | HKDB phase 1 study | 124                   | 2,896        | 0.796 | 0.765   | 1.25 (0.91 - 1.72)        | 0.1732                       | --                      | 51                   | 5,944         | 0.783 | 0.777     | 1.11 (0.69 - 1.80)        | 0.6658                       | --                      |
|                                           | HKDB phase 2 study | 119                   | 2,474        | 0.787 | 0.761   | 1.12 (0.82 - 1.54)        | 0.4647                       | --                      | 36                   | 5,552         | 0.763 | 0.776     | 0.94 (0.55 - 1.62)        | 0.8272                       | --                      |
|                                           | Meta-analysis      | <b>874</b>            | <b>8,898</b> | --    | --      | <b>1.16 (1.03 - 1.31)</b> | <b>0.0182</b>                | <b>0.8779</b>           | <b>347</b>           | <b>16,870</b> | --    | --        | <b>1.10 (0.92 - 1.32)</b> | <b>0.3017</b>                | <b>0.8371</b>           |
| PVD<br>(excluded any<br>CHD cases)        | HKDR study         | 406                   | 3,528        | 0.759 | 0.758   | 1.00 (0.84 - 1.18)        | 0.9582                       | --                      | 169                  | 4,242         | 0.768 | 0.762     | 1.03 (0.80 - 1.33)        | 0.8207                       | --                      |
|                                           | HKDB phase 1 study | 79                    | 2,896        | 0.791 | 0.765   | 1.16 (0.79 - 1.72)        | 0.4446                       | --                      | 34                   | 4,844         | 0.771 | 0.772     | 0.96 (0.54 - 1.68)        | 0.8758                       | --                      |
|                                           | HKDB phase 2 study | 76                    | 2,474        | 0.805 | 0.761   | 1.24 (0.83 - 1.86)        | 0.2877                       | --                      | 22                   | 4,525         | 0.739 | 0.773     | 0.79 (0.40 - 1.53)        | 0.4776                       | --                      |
|                                           | Meta-analysis      | <b>561</b>            | <b>8,898</b> | --    | --      | <b>1.05 (0.91 - 1.21)</b> | <b>0.5338</b>                | <b>0.5143</b>           | <b>225</b>           | <b>13,611</b> | --    | --        | <b>0.99 (0.80 - 1.23)</b> | <b>0.9217</b>                | <b>0.7518</b>           |
| CVD                                       | HKDR study         | 2,292                 | 3,528        | 0.786 | 0.758   | 1.17 (1.07 - 1.29)        | 4.6×10 <sup>-4</sup>         | --                      | 1,380                | 3,716         | 0.784 | 0.758     | 1.12 (1.02 - 1.22)        | 0.0160                       | --                      |
|                                           | HKDB phase 1 study | 1,692                 | 2,896        | 0.797 | 0.765   | 1.22 (1.09 - 1.35)        | 2.6×10 <sup>-4</sup>         | --                      | 237                  | 4,397         | 0.812 | 0.770     | 1.33 (1.05 - 1.67)        | 0.0160                       | --                      |

|                                    |                      |              |              |           |           |                           |                            |               |              |               |           |           |                           |                            |               |
|------------------------------------|----------------------|--------------|--------------|-----------|-----------|---------------------------|----------------------------|---------------|--------------|---------------|-----------|-----------|---------------------------|----------------------------|---------------|
| CVD<br>(excluded any<br>CHD cases) | HKDB phase 2 study   | 1,554        | 2,474        | 0.788     | 0.761     | 1.15 (1.03 - 1.29)        | 0.0115                     | --            | 181          | 4,134         | 0.777     | 0.772     | 1.02 (0.79 - 1.30)        | 0.8986                     | --            |
|                                    | <b>Meta-analysis</b> | <b>5,538</b> | <b>8,898</b> | <b>--</b> | <b>--</b> | <b>1.18 (1.11 - 1.25)</b> | <b>2.0×10<sup>-8</sup></b> | <b>0.7794</b> | <b>1,798</b> | <b>12,247</b> | <b>--</b> | <b>--</b> | <b>1.13 (1.04 - 1.22)</b> | <b>2.7×10<sup>-3</sup></b> | <b>0.2650</b> |
|                                    | HKDR study           | 934          | 3,528        | 0.777     | 0.758     | 1.11 (0.98 - 1.25)        | 0.0945                     | --            | 612          | 3,715         | 0.787     | 0.758     | 1.15 (1.01 - 1.32)        | 0.0408                     | --            |
|                                    | HKDB phase 1 study   | 533          | 2,896        | 0.790     | 0.765     | 1.16 (0.99 - 1.36)        | 0.0743                     | --            | 112          | 4,397         | 0.792     | 0.770     | 1.13 (0.82 - 1.56)        | 0.4508                     | --            |
|                                    | HKDB phase 2 study   | 475          | 2,474        | 0.783     | 0.761     | 1.11 (0.94 - 1.31)        | 0.2194                     | --            | 81           | 4,134         | 0.795     | 0.772     | 1.12 (0.77 - 1.63)        | 0.5613                     | --            |
|                                    | <b>Meta-analysis</b> | <b>1,942</b> | <b>8,898</b> | <b>--</b> | <b>--</b> | <b>1.12 (1.03 - 1.22)</b> | <b>6.9×10<sup>-3</sup></b> | <b>0.9111</b> | <b>805</b>   | <b>12,246</b> | <b>--</b> | <b>--</b> | <b>1.15 (1.02 - 1.29)</b> | <b>0.0245</b>              | <b>0.9840</b> |
| CHF                                | HKDR study           | 867          | 3,293        | 0.787     | 0.758     | 1.18 (1.04 - 1.35)        | 0.0102                     | --            | 725          | 5,138         | 0.787     | 0.765     | 1.11 (0.98 - 1.26)        | 0.1040                     | --            |
|                                    | HKDB phase 1 study   | 352          | 2,810        | 0.767     | 0.766     | 1.01 (0.84 - 1.21)        | 0.9120                     | --            | 107          | 5,727         | 0.771     | 0.778     | 0.96 (0.70 - 1.32)        | 0.8192                     | --            |
|                                    | HKDB phase 2 study   | 260          | 2,426        | 0.799     | 0.760     | 1.20 (0.96 - 1.50)        | 0.1157                     | --            | 44           | 5,416         | 0.783     | 0.775     | 1.00 (0.60 - 1.67)        | 0.9880                     | --            |
|                                    | <b>Meta-analysis</b> | <b>1,479</b> | <b>8,529</b> | <b>--</b> | <b>--</b> | <b>1.14 (1.03 - 1.25)</b> | <b>8.5×10<sup>-3</sup></b> | <b>0.3403</b> | <b>876</b>   | <b>16,281</b> | <b>--</b> | <b>--</b> | <b>1.08 (0.97 - 1.22)</b> | <b>0.1637</b>              | <b>0.6852</b> |
| CHF<br>(excluded any<br>CHD cases) | HKDR study           | 427          | 3,293        | 0.756     | 0.758     | 0.99 (0.84 - 1.17)        | 0.9374                     |               | 380          | 4,221         | 0.761     | 0.762     | 0.97 (0.82 - 1.15)        | 0.7478                     | --            |
|                                    | HKDB phase 1 study   | 156          | 2,810        | 0.763     | 0.766     | 0.98 (0.75 - 1.28)        | 0.9034                     |               | 56           | 4,772         | 0.786     | 0.772     | 1.07 (0.69 - 1.68)        | 0.7585                     | --            |
|                                    | HKDB phase 2 study   | 108          | 2,426        | 0.780     | 0.760     | 1.07 (0.77 - 1.48)        | 0.6985                     |               | 25           | 4,498         | 0.796     | 0.773     | 1.13 (0.57 - 2.27)        | 0.7238                     | --            |
|                                    | <b>Meta-analysis</b> | <b>691</b>   | <b>8,529</b> | <b>--</b> | <b>--</b> | <b>1.00 (0.88 - 1.14)</b> | <b>0.9732</b>              | <b>0.9186</b> | <b>461</b>   | <b>13,491</b> | <b>--</b> | <b>--</b> | <b>0.99 (0.85 - 1.16)</b> | <b>0.9117</b>              | <b>0.8562</b> |
| CKD                                | HKDR study           | 3,559        | 2,327        | 0.775     | 0.758     | 1.11 (1.02 - 1.21)        | 0.0168                     | --            | 2,142        | 2,450         | 0.772     | 0.759     | 1.06 (0.99 - 1.14)        | 0.0896                     | --            |
|                                    | HKDB phase 1 study   | 2,197        | 2,370        | 0.793     | 0.760     | 1.22 (1.10 - 1.34)        | 1.4×10 <sup>-4</sup>       | --            | 540          | 3,901         | 0.799     | 0.769     | 1.22 (1.05 - 1.41)        | 0.0101                     | --            |
|                                    | HKDB phase 2 study   | 1,875        | 2,125        | 0.778     | 0.768     | 1.04 (0.94 - 1.16)        | 0.4365                     | --            | 339          | 3,848         | 0.786     | 0.776     | 1.06 (0.88 - 1.27)        | 0.5316                     | --            |
|                                    | <b>Meta-analysis</b> | <b>7,631</b> | <b>6,822</b> | <b>--</b> | <b>--</b> | <b>1.12 (1.06 - 1.19)</b> | <b>4.8×10<sup>-5</sup></b> | <b>0.1154</b> | <b>3,021</b> | <b>10,199</b> | <b>--</b> | <b>--</b> | <b>1.09 (1.02 - 1.16)</b> | <b>6.9×10<sup>-3</sup></b> | <b>0.2732</b> |
| CKD<br>(excluded any<br>CHD cases) | HKDR study           | 2,502        | 2,045        | 0.767     | 0.754     | 1.08 (0.98 - 1.19)        | 0.1325                     | --            | 1,556        | 2,149         | 0.763     | 0.755     | 1.04 (0.96 - 1.13)        | 0.3751                     | --            |
|                                    | HKDB phase 1 study   | 1,572        | 2,012        | 0.790     | 0.754     | 1.24 (1.11 - 1.39)        | 1.8×10 <sup>-4</sup>       | --            | 414          | 3,370         | 0.803     | 0.763     | 1.28 (1.08 - 1.52)        | 4.5×10 <sup>-3</sup>       | --            |
|                                    | HKDB phase 2 study   | 1,341        | 1,789        | 0.774     | 0.759     | 1.07 (0.95 - 1.20)        | 0.2721                     | --            | 265          | 3,297         | 0.782     | 0.773     | 1.06 (0.87 - 1.30)        | 0.5611                     | --            |
|                                    | <b>Meta-analysis</b> | <b>5,415</b> | <b>5,846</b> | <b>--</b> | <b>--</b> | <b>1.12 (1.05 - 1.19)</b> | <b>3.0×10<sup>-4</sup></b> | <b>0.1101</b> | <b>2,235</b> | <b>8,816</b>  | <b>--</b> | <b>--</b> | <b>1.08 (1.01 - 1.16)</b> | <b>0.0342</b>              | <b>0.0953</b> |
| KF                                 | HKDR study           | 1,005        | 2,327        | 0.798     | 0.758     | 1.27 (1.12 - 1.45)        | 2.4×10 <sup>-4</sup>       | --            | 923          | 5,002         | 0.794     | 0.763     | 1.17 (1.05 - 1.31)        | 6.2×10 <sup>-3</sup>       | --            |
|                                    | HKDB phase 1 study   | 357          | 2,370        | 0.786     | 0.760     | 1.16 (0.96 - 1.41)        | 0.1240                     | --            | 263          | 5,725         | 0.789     | 0.777     | 1.09 (0.89 - 1.35)        | 0.4112                     | --            |
|                                    | HKDB phase 2 study   | 371          | 2,125        | 0.775     | 0.768     | 1.05 (0.87 - 1.26)        | 0.6398                     | --            | 119          | 5,335         | 0.778     | 0.777     | 1.00 (0.74 - 1.36)        | 0.9999                     | --            |
|                                    | <b>Meta-analysis</b> | <b>1,733</b> | <b>6,822</b> | <b>--</b> | <b>--</b> | <b>1.19 (1.08 - 1.30)</b> | <b>2.9×10<sup>-4</sup></b> | <b>0.2302</b> | <b>1,305</b> | <b>16,062</b> | <b>--</b> | <b>--</b> | <b>1.14 (1.03 - 1.25)</b> | <b>7.7×10<sup>-3</sup></b> | <b>0.5864</b> |
| KF<br>(excluded any<br>CHD cases)  | HKDR study           | 648          | 2,045        | 0.791     | 0.754     | 1.24 (1.07 - 1.45)        | 5.4×10 <sup>-3</sup>       | --            | 596          | 3,998         | 0.787     | 0.757     | 1.16 (1.01 - 1.33)        | 0.0373                     | --            |
|                                    | HKDB phase 1 study   | 239          | 2,012        | 0.780     | 0.754     | 1.16 (0.93 - 1.46)        | 0.1908                     | --            | 182          | 4,690         | 0.776     | 0.771     | 1.02 (0.80 - 1.30)        | 0.8771                     | --            |
|                                    | HKDB phase 2 study   | 255          | 1,789        | 0.771     | 0.759     | 1.08 (0.87 - 1.35)        | 0.4928                     | --            | 84           | 4,371         | 0.789     | 0.773     | 1.13 (0.77 - 1.64)        | 0.5347                     | --            |
|                                    | <b>Meta-analysis</b> | <b>1,142</b> | <b>5,846</b> | <b>--</b> | <b>--</b> | <b>1.18 (1.06 - 1.32)</b> | <b>2.9×10<sup>-3</sup></b> | <b>0.5891</b> | <b>862</b>   | <b>13,059</b> | <b>--</b> | <b>--</b> | <b>1.12 (1.00 - 1.26)</b> | <b>0.0466</b>              | <b>0.6754</b> |

In the case-control analysis, associations were assessed by logistic regression with the adjustments for sex, age and principal components.  
In the prospective analysis, associations were assessed by Cox regression with the adjustments for sex, age, duration of diabetes and principal components.  
Results obtained from the individual cohorts were meta-analysed under a fixed effect model.

ORs/HRs and 95% CIs were reported according to the CHD-related risk allele (C-allele) of *PDE1A* rs10171703.

$P_{het}$  refers to the  $p$ -value obtained from the heterogeneity test (Cochran's Q test).

Cardiovascular complications include coronary heart disease, myocardial infarction, stroke, peripheral vascular disease, cardiovascular disease, and congestive heart failure

Renal complications include chronic kidney disease, and kidney failure

In the case-control analysis for a particular outcome, patients with either history or incidence of outcome were enrolled in the group of cases. The counterpart controls for each outcome were defined as patients who 1) had duration of diabetes >10 years, and 2) were free from cardiovascular (chronic kidney) disease for the analysis of cardiovascular (renal) outcomes.

In the prospective analysis for a particular outcome, we included the patients who had no history but incidence of that outcome in the event group, while patients without both history and incidence of the outcome were included in the non-event group.

CHD: Coronary heart disease

MI: Myocardial infarction

PVD: Peripheral vascular disease

CVD: Cardiovascular disease

CHF: Congestive heart failure

CKD: Chronic kidney disease

KF: Kidney failure

RAF: Risk allele frequency

**Supplementary Table S7.** Associations of *PDE1A* rs10171703 with the risks of cardio-renal complications in replication cohorts (data from public domains).

| Diabetic complication | Cohort                                                     | Population                                | Covariates                                                                | N      |         | RAF    |         | Logistic regression |                              |
|-----------------------|------------------------------------------------------------|-------------------------------------------|---------------------------------------------------------------------------|--------|---------|--------|---------|---------------------|------------------------------|
|                       |                                                            |                                           |                                                                           | Case   | Control | Case   | Control | OR (95% CI)         | <i>P</i> <sub>additive</sub> |
| MI                    | Biobank Japan Project [1]                                  | Japanese from general populations         | age, age <sup>2</sup> , sex, age × sex, age <sup>2</sup> × sex, and PCs   | 14,992 | 146,214 | 0.728  | 0.724   | 1.04 (1.01 - 1.07)  | 0.0127                       |
|                       | FinnGEN Project [2]                                        | Europeans from general populations        | sex, age, PCs, and genotyping batch                                       | 12,801 | 187,840 | 0.488  | 0.479   | 1.04 (1.01 - 1.07)  | 8.2×10 <sup>-3</sup>         |
|                       | Meta-analysis of UK Biobank and CARDIoGRAMplusC4D GWAS [3] | Europeans from general populations        | sex, age, PCs, and genotyping array                                       | 61,505 | 577,716 | 0.496  |         | 1.02 (1.01 - 1.04)  | 4.7×10 <sup>-3</sup>         |
| Any stroke            | MEGASTROKE Consortium [4]                                  | Europeans                                 | sex, age, and other study-specific covariates                             | 40,585 | 406,111 | 0.4941 |         | 1.03 (1.01 - 1.04)  | 6.5×10 <sup>-3</sup>         |
|                       | MEGASTROKE Consortium [4]                                  | Transethnic meta-analysis                 | sex, age, and other study-specific covariates                             | 67,162 | 454,450 | 0.4713 |         | 1.02 (1.00 - 1.04)  | 0.0113                       |
| CKD                   | SUMMIT Consortium [5]                                      | Transethnic meta-analysis in T2D patients | age, sex and duration of diabetes                                         | 3,094  | 2,906   | 0.500  |         | 1.00 (0.92 - 1.09)  | 0.8900                       |
|                       | CKDGen consortium [6]                                      | Transethnic meta-analysis                 | sex, age, study site, PCs, relatedness, and other study-specific features | 64,164 | 561,055 | 0.560  |         | 1.01 (0.99 - 1.03)  | 0.2204                       |
|                       | FinnGEN Project [2]                                        | European from general population          | sex, age, PCs, and genotyping batch                                       | 3,902  | 212,841 | 0.490  | 0.479   | 1.04 (1.00 - 1.09)  | 0.0741                       |
| KF                    | SUMMIT Consortium [5]                                      | Transethnic meta-analysis in T2D patients | age, sex and duration of diabetes                                         | 371    | 4,471   | 0.490  |         | 1.10 (0.94 - 1.29)  | 0.3300                       |
|                       | FinnGEN Project [2]                                        | European from general population          | sex, age, PCs, and genotyping batch                                       | 5,951  | 212,841 | 0.488  | 0.479   | 1.04 (1.00 - 1.08)  | 0.0674                       |

ORs and 95% CIs were reported according to the CHD-related risk allele (C-allele) of *PDE1A* rs10171703

MI: Myocardial infarction  
CKD: Chronic kidney disease  
KF: Kidney failure  
RAF: Risk allele frequency  
PC: Principal components

**References:**



- [1] Sakaue S, Kanai M, Tanigawa Y *et al.* A cross-population atlas of genetic associations for 220 human phenotypes. *Nat Genet.* 2021 Oct;53(10):1415-1424.
- [2] Kurki MI, Karjalainen J, Palta P *et al.* FinnGen: Unique genetic insights from combining isolated population and national health register data. *medRxiv* 2022:2022.2003.2003.22271360
- [3] Hartiala JA, Han Y, Jia Q *et al.* Genome-wide analysis identifies novel susceptibility loci for myocardial infarction. *Eur Heart J.* 2021 Mar 1;42(9):919-933.
- [4] Malik R, Chauhan G, Traylor M *et al.* Multiancestry genome-wide association study of 520,000 subjects identifies 32 loci associated with stroke and stroke subtypes. *Nat Genet.* 2018 Apr;50(4):524-537.
- [5] van Zuydam NR, Ahlqvist E, Sandholm N *et al.* A Genome-Wide Association Study of Diabetic Kidney Disease in Subjects With Type 2 Diabetes. *Diabetes.* 2018 Jul;67(7):1414-1427.
- [6] Wuttke M, Li Y, Li M *et al.* A catalog of genetic loci associated with kidney function from analyses of a million individuals. *Nat Genet.* 2019 Jun;51(6):957-972.

**Supplementary Table S8.** Associations of *PDE1A* rs10171703 with blood pressure, and body height in Chinese patients with type 2 diabetes and other populations.

| Related traits         | Cohort [Ref]                                                                    | Population           | Covariates                                                                            | Total <i>N</i> (Cases) | RAF         | $\beta \pm SE /$<br>OR (95% CI) | <i>P</i>             | <i>P</i> <sub>het</sub> |
|------------------------|---------------------------------------------------------------------------------|----------------------|---------------------------------------------------------------------------------------|------------------------|-------------|---------------------------------|----------------------|-------------------------|
| DBP                    | Meta-analysis of the HKDR Study, the HKDB Phase 1 and 2 studies                 | Chinese T2D patients | sex, age, duration of diabetes, PCs                                                   | 17,735                 | 0.769-0.778 | 0.332 ± 0.153                   | 0.0297               | 0.9730                  |
|                        | Biobank Japan Project (Kanai et al. 2018) [1]                                   | Japanese             | Sex, age, age <sup>2</sup> , PCs, affection status of 47 diseases, and smoking status | 136,615                | 0.723       | 0.013 ± 0.004                   | 2.1×10 <sup>-3</sup> | --                      |
|                        | Biobank Japan Project (Sakaue et al. 2021) [2]                                  | Japanese             | age, age <sup>2</sup> , sex, age × sex, age <sup>2</sup> × sex, and PCs               | 145,515                | 0.724       | 0.013 ± 0.004                   | 6.5×10 <sup>-4</sup> | --                      |
|                        | Meta-analysis of Biobank Japan Project, and UK Biobank (Sakaue et al. 2021) [2] | Japanese             | age, age <sup>2</sup> , sex, age × sex, age <sup>2</sup> × sex, and PCs               | 485,677                | 0.513-0.724 | 0.012 ± 0.002                   | 1.2×10 <sup>-8</sup> | --                      |
| SBP                    | Meta-analysis of the HKDR Study, the HKDB Phase 1 and 2 studies                 | Chinese T2D patients | sex, age, duration of diabetes, PCs                                                   | 17,737                 | 0.768-0.778 | 0.595 ± 0.257                   | 0.0208               | 0.3844                  |
|                        | Biobank Japan Project (Kanai et al. 2018) [1]                                   | Japanese             | Sex, age, age <sup>2</sup> , PCs, affection status of 47 diseases, and smoking status | 136,597                | 0.723       | 0.006 ± 0.004                   | 0.1920               | --                      |
|                        | Biobank Japan Project (Sakaue et al. 2021) [2]                                  | Japanese             | age, age <sup>2</sup> , sex, age × sex, age <sup>2</sup> × sex, and PCs               | 145,505                | 0.724       | 0.007 ± 0.004                   | 0.0770               | --                      |
|                        | Meta-analysis of Biobank Japan Project, and UK Biobank (Sakaue et al. 2021) [2] | Japanese             | age, age <sup>2</sup> , sex, age × sex, age <sup>2</sup> × sex, and PCs               | 485,664                | 0.513-0.724 | 0.003 ± 0.002                   | 0.1516               | --                      |
| Hypertension           | Meta-analysis of the HKDR Study, the HKDB Phase 1 and 2 studies                 | Chinese T2D patients | sex, age, duration of diabetes, PCs                                                   | 17,700 (14,627)        | 0.753-0.779 | 1.09 (1.01 - 1.17)              | 0.0174               | 0.3368                  |
| Hypertension           | FinnGEN Project [3]                                                             | Europeans            | sex, age, PCs, and genotyping batch                                                   | 218,754 (55,917)       | 0.479       | 1.02 (1.00 - 1.03)              | 0.0785               | --                      |
| Essential hypertension | FinnGEN Project [3]                                                             | Europeans            | sex, age, PCs, and genotyping batch                                                   | 205,694 (42,857)       | 0.479       | 1.02 (1.00 - 1.04)              | 0.0481               | --                      |
| Body height            | Meta-analysis of the HKDR Study, the HKDB Phase 1 and 2 studies                 | Chinese T2D patients | sex, age, duration of diabetes, PCs                                                   | 17,712                 | 0.769-0.778 | -0.0001 ± 0.001                 | 0.8839               | 0.356                   |
|                        | Biobank Japan Project (Kanai et al. 2018) [1]                                   | Japanese             | Sex, age, age <sup>2</sup> , PCs, affection status of 47 diseases, and smoking status | 159,095                | 0.724       | -0.003 ± 0.003                  | 0.3300               | --                      |

|                                                                                 |          |                                                                         |         |             |                |                      |    |
|---------------------------------------------------------------------------------|----------|-------------------------------------------------------------------------|---------|-------------|----------------|----------------------|----|
| Biobank Japan Project (Sakaue et al. 2021) [2]                                  | Japanese | age, age <sup>2</sup> , sex, age × sex, age <sup>2</sup> × sex, and PCs | 165,056 | 0.724       | -0.001 ± 0.002 | 0.5700               | -- |
| Meta-analysis of Biobank Japan Project, and UK Biobank (Sakaue et al. 2021) [2] | Japanese | age, age <sup>2</sup> , sex, age × sex, age <sup>2</sup> × sex, and PCs | 525,444 | 0.513-0.724 | -0.004 ± 0.001 | 2.9×10 <sup>-3</sup> | -- |

For individuals taking anti-hypertensive medications, 15 mmHg was added to SBP and 10 mmHg was added to DBP in the HKDR Study, the HKDB Phase 1 and 2 Studies, and the Biobank Japan Project.

Hypertension was defined as blood pressure at or above 130/80 mmHg, or use of angiotensin-converting enzyme inhibitors or angiotensin receptor blockers, or use of other antihypertensive medications in the HKDR Study, the HKDB Phase 1 and 2 Studies.

Associations of *PDE1A* rs10171703 with body height, systolic and diastolic blood pressure were tested by linear regression adjusted for sex, age, duration of diabetes and PCs in each cohort.

Association between *PDE1A* rs10171703 and hypertension was tested by logistic regression adjusted for sex, age, duration of diabetes and PCs in each cohort.

Results obtained from the individual cohorts were meta-analysed under a fixed effect model.

$\beta \pm SE$  / ORs and 95% CIs were reported according to the CHD-related risk allele (C-allele) of *PDE1A* rs10171703

$P_{het}$  refers to the  $p$ -value obtained from the heterogeneity test (Cochran's Q test)

DBP: Diastolic blood pressure

SBP: Systolic blood pressure

PCs: principal components

RAF: Risk allele frequency

**References:**

[1] Kanai M, Akiyama M, Takahashi A *et al.* Genetic analysis of quantitative traits in the Japanese population links cell types to complex human diseases. *Nat Genet.* 2018 Mar;50(3):390-400.

[2] Sakaue S, Kanai M, Tanigawa Y *et al.* A cross-population atlas of genetic associations for 220 human phenotypes. *Nat Genet.* 2021 Oct;53(10):1415-1424.

[3] Kurki MI, Karjalainen J, Palta P *et al.* FinnGen: Unique genetic insights from combining isolated population and national health register data. *medRxiv* 2022:2022.2003.2003.22271360

**Supplementary Table S9.** Modification effect of *PDE1A* rs10171703 on the association between ABC goals attainment and new-onset of diabetes cardiovascular complications.

| Diabetic complications | ABC goals                      | Testing for the interaction effect between <i>PDE1A</i> rs10171703 and each ABC goal |                    |                                 | Association between each ABC goal and diabetic complications according to <i>PDE1A</i> rs10171703 genotypes |                |                    |                    |                      |
|------------------------|--------------------------------|--------------------------------------------------------------------------------------|--------------------|---------------------------------|-------------------------------------------------------------------------------------------------------------|----------------|--------------------|--------------------|----------------------|
|                        |                                | Event <i>n</i>                                                                       | Non-event <i>n</i> | <i>P</i> <sub>interaction</sub> | Subgroup                                                                                                    | Event <i>n</i> | Non-event <i>n</i> | HR (95% CI)        | <i>P</i>             |
| Coronary heart disease | HbA <sub>1c</sub> <7%          | 1,127                                                                                | 13,782             | 0.8503                          | TT genotype carriers                                                                                        | 46             | 740                | 0.39 (0.18 - 0.85) | 0.0174               |
|                        |                                |                                                                                      |                    |                                 | CT genotype carriers                                                                                        | 376            | 4,868              | 0.82 (0.66 - 1.02) | 0.0781               |
|                        |                                |                                                                                      |                    |                                 | CC genotype carriers                                                                                        | 705            | 8,166              | 0.70 (0.60 - 0.83) | 2.1×10 <sup>-5</sup> |
|                        | SBP <130 mmHg and DBP <80 mmHg | 1,139                                                                                | 14,158             | 0.0155                          | TT genotype carriers                                                                                        | 47             | 762                | 1.13 (0.61 - 2.08) | 0.6946               |
|                        |                                |                                                                                      |                    |                                 | CT genotype carriers                                                                                        | 382            | 5,005              | 0.81 (0.65 - 1.02) | 0.0726               |
|                        |                                |                                                                                      |                    |                                 | CC genotype carriers                                                                                        | 710            | 8,383              | 0.60 (0.51 - 0.72) | 2.9×10 <sup>-8</sup> |
|                        | LDL <2.6 mmol/l                | 1,082                                                                                | 13,675             | 0.8032                          | TT genotype carriers                                                                                        | 44             | 733                | 0.67 (0.33 - 1.35) | 0.2621               |
|                        |                                |                                                                                      |                    |                                 | CT genotype carriers                                                                                        | 364            | 4,825              | 0.80 (0.63 - 1.03) | 0.0783               |
|                        |                                |                                                                                      |                    |                                 | CC genotype carriers                                                                                        | 674            | 8,109              | 0.75 (0.63 - 0.90) | 1.6×10 <sup>-3</sup> |
| Myocardial infarction  | HbA <sub>1c</sub> <7%          | 575                                                                                  | 15,857             | 0.6628                          | TT genotype carriers                                                                                        | 26             | 815                | 0.54 (0.21 - 1.38) | 0.1961               |
|                        |                                |                                                                                      |                    |                                 | CT genotype carriers                                                                                        | 191            | 5,560              | 0.80 (0.59 - 1.10) | 0.1650               |
|                        |                                |                                                                                      |                    |                                 | CC genotype carriers                                                                                        | 358            | 9,473              | 0.64 (0.51 - 0.81) | 2.2×10 <sup>-4</sup> |
|                        | SBP <130 mmHg and DBP <80 mmHg | 581                                                                                  | 16,273             | 5.1×10 <sup>-4</sup>            | TT genotype carriers                                                                                        | 26             | 838                | 3.02 (1.36 - 6.70) | 6.7×10 <sup>-3</sup> |
|                        |                                |                                                                                      |                    |                                 | CT genotype carriers                                                                                        | 192            | 5,707              | 0.83 (0.61 - 1.15) | 0.2614               |
|                        |                                |                                                                                      |                    |                                 | CC genotype carriers                                                                                        | 363            | 9,719              | 0.58 (0.45 - 0.75) | 3.6×10 <sup>-5</sup> |
|                        | LDL <2.6 mmol/l                | 547                                                                                  | 15,719             | 0.3048                          | TT genotype carriers                                                                                        | 24             | 805                | 0.56 (0.20 - 1.56) | 0.2706               |
|                        |                                |                                                                                      |                    |                                 | CT genotype carriers                                                                                        | 179            | 5,500              | 0.66 (0.46 - 0.95) | 0.0254               |
|                        |                                |                                                                                      |                    |                                 | CC genotype carriers                                                                                        | 344            | 9,405              | 0.75 (0.59 - 0.97) | 0.0277               |

These analyses were conducted in the combined cohort of the HKDR Study, the HKDB Phase 1 and 2 Studies. *P*<sub>interaction</sub> was the *p*-value of the interaction term obtained from the Cox regression model including two main effects (e.g. *PDE1A* rs10171703 and achievement of blood pressure target [i.e. SBP <130 mmHg and DBP <80 mmHg]), the interaction term of main effects, and the covariates (i.e. study cohorts [HKDR Study, HKDB Phase 1 and 2 Studies], enrolment year, sex, age, duration of diabetes, and principal components [PCs]).

*P*, hazard ratio (HR) and 95% CI were obtained from the Cox regression model assessing the association between the achievement of each ABC goal ('yes' [coded as 1] vs. 'no' [coded as 0]) and incidence of diabetes cardiovascular complications, adjusting for study cohorts (HKDR Study, HKDB Phase 1 and 2 Studies), enrolment year, sex, age, duration of diabetes, and PCs.

Event: patients had no history but incidence of outcome

Non-event: patients had neither history nor incidence of outcome

**Supplementary Table S10.** Sensitivity analysis for the interaction effect of *PDE1A* rs10171703 and blood pressure control on new-onset of diabetes cardiovascular complications.

|                        |                  | Combined cohorts (HKDR Study, HKDB Phase 1 and 2 Studies) |                    |                           |                                 |                |                    |                           |                                 |
|------------------------|------------------|-----------------------------------------------------------|--------------------|---------------------------|---------------------------------|----------------|--------------------|---------------------------|---------------------------------|
| Diabetic complications | Follow-up period | Model I                                                   |                    |                           |                                 | Model II       |                    |                           |                                 |
|                        |                  | Event <i>n</i>                                            | Non-event <i>n</i> | HR (95% CI)               | <i>P</i> <sub>interaction</sub> | Event <i>n</i> | Non-event <i>n</i> | HR (95% CI)               | <i>P</i> <sub>interaction</sub> |
| Coronary heart disease | ≤1 year          | 102                                                       | 15,195             | 0.53 (0.27 - 1.06)        | 0.0738                          | 55             | 9132               | 0.78 (0.28 - 2.15)        | 0.6302                          |
|                        | ≤2 year          | 252                                                       | 15,045             | 0.58 (0.37 - 0.90)        | 0.0152                          | 163            | 9024               | 0.65 (0.37 - 1.13)        | 0.1271                          |
|                        | ≤3 year          | 393                                                       | 14,904             | 0.52 (0.36 - 0.75)        | 5.0E-04                         | 257            | 8930               | 0.54 (0.34 - 0.86)        | 9.5E-03                         |
|                        | ≤4 year          | 497                                                       | 14,800             | 0.58 (0.42 - 0.80)        | 1.0E-03                         | 327            | 8860               | 0.63 (0.41 - 0.95)        | 0.0269                          |
|                        | ≤5 year          | 554                                                       | 14,743             | 0.58 (0.42 - 0.80)        | 7.2E-04                         | 375            | 8812               | 0.63 (0.42 - 0.93)        | 0.0204                          |
|                        | ≤6 year          | 617                                                       | 14,680             | 0.62 (0.46 - 0.84)        | 1.7E-03                         | 430            | 8757               | 0.66 (0.46 - 0.95)        | 0.0268                          |
|                        | ≤7 year          | 655                                                       | 14,642             | 0.62 (0.47 - 0.83)        | 1.3E-03                         | 463            | 8724               | 0.64 (0.45 - 0.90)        | 0.0111                          |
|                        | ≤8 year          | 700                                                       | 14,597             | 0.62 (0.47 - 0.82)        | 7.5E-04                         | 501            | 8686               | 0.62 (0.44 - 0.87)        | 6.2E-03                         |
|                        | ≤9 year          | 742                                                       | 14,555             | 0.61 (0.47 - 0.81)        | 4.2E-04                         | 536            | 8651               | 0.60 (0.43 - 0.83)        | 2.0E-03                         |
|                        | ≤10 year         | 785                                                       | 14,512             | 0.64 (0.49 - 0.83)        | 8.9E-04                         | 574            | 8613               | 0.62 (0.46 - 0.85)        | 3.2E-03                         |
|                        | ≤26 year         | <b>1,139</b>                                              | <b>14,158</b>      | <b>0.76 (0.61 - 0.95)</b> | <b>0.0155</b>                   | <b>889</b>     | <b>8298</b>        | <b>0.77 (0.6 - 0.99)</b>  | <b>0.0424</b>                   |
| Myocardial infarction  | ≤1 year          | 66                                                        | 16,788             | 0.35 (0.15 - 0.81)        | 0.0142                          | 29             | 10013              | 0.61 (0.17 - 2.19)        | 0.4453                          |
|                        | ≤2 year          | 129                                                       | 16,725             | 0.37 (0.20 - 0.67)        | 1.3E-03                         | 67             | 9975               | 0.34 (0.15 - 0.80)        | 0.0139                          |
|                        | ≤3 year          | 190                                                       | 16,664             | 0.33 (0.19 - 0.55)        | 2.9E-05                         | 104            | 9938               | 0.26 (0.13 - 0.54)        | 2.4E-04                         |
|                        | ≤4 year          | 234                                                       | 16,620             | 0.40 (0.25 - 0.64)        | 1.3E-04                         | 131            | 9911               | 0.36 (0.19 - 0.67)        | 1.3E-03                         |
|                        | ≤5 year          | 262                                                       | 16,592             | 0.41 (0.26 - 0.63)        | 7.1E-05                         | 153            | 9889               | 0.36 (0.20 - 0.66)        | 7.6E-04                         |
|                        | ≤6 year          | 280                                                       | 16,574             | 0.41 (0.26 - 0.62)        | 3.7E-05                         | 167            | 9875               | 0.37 (0.21 - 0.64)        | 4.4E-04                         |
|                        | ≤7 year          | 293                                                       | 16,561             | 0.43 (0.28 - 0.65)        | 6.7E-05                         | 179            | 9863               | 0.40 (0.24 - 0.69)        | 8.7E-04                         |
|                        | ≤8 year          | 308                                                       | 16,546             | 0.43 (0.28 - 0.65)        | 6.0E-05                         | 193            | 9849               | 0.39 (0.23 - 0.67)        | 5.9E-04                         |
|                        | ≤9 year          | 327                                                       | 16,527             | 0.44 (0.29 - 0.65)        | 4.4E-05                         | 208            | 9834               | 0.39 (0.24 - 0.65)        | 2.5E-04                         |
|                        | ≤10 year         | 346                                                       | 16,508             | 0.44 (0.30 - 0.64)        | 2.6E-05                         | 224            | 9818               | 0.39 (0.24 - 0.62)        | 1.1E-04                         |
|                        | ≤26 year         | <b>581</b>                                                | <b>16,273</b>      | <b>0.58 (0.43 - 0.79)</b> | <b>5.1E-04</b>                  | <b>434</b>     | <b>9608</b>        | <b>0.56 (0.39 - 0.81)</b> | <b>1.7E-03</b>                  |

Supplementary Table S10. *Continued.*

|                        |                  | HKDR Study     |                    |                           |                                 |                |                    |                           |                                 |
|------------------------|------------------|----------------|--------------------|---------------------------|---------------------------------|----------------|--------------------|---------------------------|---------------------------------|
|                        |                  | Model I        |                    |                           |                                 | Model II       |                    |                           |                                 |
|                        |                  | Event <i>n</i> | Non-event <i>n</i> | HR (95% CI)               | <i>P</i> <sub>interaction</sub> | Event <i>n</i> | Non-event <i>n</i> | HR (95% CI)               | <i>P</i> <sub>interaction</sub> |
| Diabetic complications | Follow-up period |                |                    |                           |                                 |                |                    |                           |                                 |
| Coronary heart disease | ≤1 year          | 45             | 5,462              | 0.57 (0.20 - 1.60)        | 0.2830                          | 39             | 4,925              | 0.83 (0.26 - 2.60)        | 0.7425                          |
|                        | ≤2 year          | 111            | 5,396              | 0.62 (0.31 - 1.21)        | 0.1587                          | 101            | 4,863              | 0.67 (0.33 - 1.37)        | 0.2740                          |
|                        | ≤3 year          | 179            | 5,328              | 0.53 (0.31 - 0.90)        | 0.0197                          | 163            | 4,801              | 0.54 (0.31 - 0.94)        | 0.0299                          |
|                        | ≤4 year          | 235            | 5,272              | 0.62 (0.39 - 1.00)        | 0.0503                          | 215            | 4,749              | 0.62 (0.38 - 1.02)        | 0.0603                          |
|                        | ≤5 year          | 278            | 5,229              | 0.61 (0.39 - 0.94)        | 0.0271                          | 253            | 4,711              | 0.62 (0.39 - 0.98)        | 0.0423                          |
|                        | ≤6 year          | 340            | 5,167              | 0.67 (0.45 - 1.00)        | 0.0510                          | 308            | 4,656              | 0.66 (0.43 - 1.00)        | 0.0525                          |
|                        | ≤7 year          | 378            | 5,129              | 0.67 (0.46 - 0.98)        | 0.0404                          | 341            | 4,623              | 0.63 (0.42 - 0.94)        | 0.0223                          |
|                        | ≤8 year          | 423            | 5,084              | 0.65 (0.46 - 0.94)        | 0.0219                          | 379            | 4,585              | 0.61 (0.42 - 0.90)        | 0.0121                          |
|                        | ≤9 year          | 465            | 5,042              | 0.64 (0.46 - 0.91)        | 0.0119                          | 414            | 4,550              | 0.59 (0.41 - 0.84)        | 3.9E-03                         |
|                        | ≤10 year         | 508            | 4,999              | 0.68 (0.49 - 0.95)        | 0.0231                          | 452            | 4,512              | 0.61 (0.43 - 0.87)        | 6.1E-03                         |
|                        | ≤26 year         | <b>862</b>     | <b>4,645</b>       | <b>0.84 (0.65 - 1.08)</b> | <b>0.1790</b>                   | <b>767</b>     | <b>4,197</b>       | <b>0.78 (0.60 - 1.03)</b> | <b>0.0767</b>                   |
| Myocardial infarction  | ≤1 year          | 22             | 5,830              | 0.30 (0.07 - 1.20)        | 0.0889                          | 18             | 5,260              | 0.49 (0.11 - 2.18)        | 0.3487                          |
|                        | ≤2 year          | 47             | 5,805              | 0.29 (0.11 - 0.78)        | 0.0146                          | 40             | 5,238              | 0.31 (0.10 - 0.91)        | 0.0338                          |
|                        | ≤3 year          | 69             | 5,783              | 0.26 (0.11 - 0.58)        | 1.0E-03                         | 60             | 5,218              | 0.25 (0.11 - 0.62)        | 2.4E-03                         |
|                        | ≤4 year          | 84             | 5,768              | 0.33 (0.16 - 0.69)        | 2.9E-03                         | 73             | 5,205              | 0.33 (0.15 - 0.73)        | 5.9E-03                         |
|                        | ≤5 year          | 101            | 5,751              | 0.29 (0.15 - 0.58)        | 4.5E-04                         | 87             | 5,191              | 0.30 (0.14 - 0.62)        | 1.3E-03                         |
|                        | ≤6 year          | 119            | 5,733              | 0.32 (0.17 - 0.59)        | 3.0E-04                         | 101            | 5,177              | 0.31 (0.15 - 0.61)        | 6.8E-04                         |
|                        | ≤7 year          | 132            | 5,720              | 0.36 (0.20 - 0.65)        | 7.0E-04                         | 113            | 5,165              | 0.36 (0.19 - 0.69)        | 1.9E-03                         |
|                        | ≤8 year          | 147            | 5,705              | 0.36 (0.20 - 0.64)        | 5.0E-04                         | 127            | 5,151              | 0.35 (0.19 - 0.66)        | 1.2E-03                         |
|                        | ≤9 year          | 166            | 5,686              | 0.39 (0.23 - 0.66)        | 4.8E-04                         | 142            | 5,136              | 0.36 (0.20 - 0.65)        | 6.2E-04                         |
|                        | ≤10 year         | 185            | 5,667              | 0.39 (0.23 - 0.65)        | 2.8E-04                         | 158            | 5,120              | 0.35 (0.20 - 0.60)        | 1.9E-04                         |
|                        | ≤26 year         | <b>420</b>     | <b>5,432</b>       | <b>0.61 (0.43 - 0.87)</b> | <b>6.0E-03</b>                  | <b>368</b>     | <b>4,910</b>       | <b>0.57 (0.39 - 0.84)</b> | <b>4.4E-03</b>                  |

Supplementary Table S10. *Continued.*

|                        |                  | HKDB Phase 1 and 2 Studies |                    |                    |                                 |                |                    |                    |                                 |
|------------------------|------------------|----------------------------|--------------------|--------------------|---------------------------------|----------------|--------------------|--------------------|---------------------------------|
|                        |                  | Model I                    |                    |                    |                                 | Model II       |                    |                    |                                 |
| Diabetic complications | Follow-up period | Event <i>n</i>             | Non-event <i>n</i> | HR (95% CI)        | <i>P</i> <sub>interaction</sub> | Event <i>n</i> | Non-event <i>n</i> | HR (95% CI)        | <i>P</i> <sub>interaction</sub> |
| Coronary heart disease | ≤1 year          | 57                         | 9,732              | 0.48 (0.19 - 1.25) | 0.1324                          | 16             | 4,207              | 0.78 (0.07 - 8.36) | 0.8407                          |
|                        | ≤2 year          | 141                        | 9,648              | 0.52 (0.29 - 0.95) | 0.0322                          | 62             | 4,161              | 0.53 (0.21 - 1.33) | 0.1759                          |
|                        | ≤3 year          | 214                        | 9,575              | 0.50 (0.30 - 0.84) | 8.4E-03                         | 94             | 4,129              | 0.54 (0.23 - 1.25) | 0.1477                          |
|                        | ≤4 year          | 262                        | 9,527              | 0.53 (0.34 - 0.84) | 7.1E-03                         | 112            | 4,111              | 0.62 (0.28 - 1.34) | 0.2240                          |
|                        | ≤5 year          | 276                        | 9,513              | 0.56 (0.36 - 0.87) | 9.7E-03                         | 122            | 4,101              | 0.63 (0.30 - 1.31) | 0.2161                          |
|                        | ≤6 year          | 277                        | 9,512              | 0.56 (0.36 - 0.88) | 0.0109                          | 122            | 4,101              | 0.63 (0.30 - 1.31) | 0.2161                          |
|                        | ≤7 year          | 277                        | 9,512              | 0.56 (0.36 - 0.88) | 0.0109                          | 122            | 4,101              | 0.63 (0.30 - 1.31) | 0.2161                          |
|                        | ≤8 year          | 277                        | 9,512              | 0.56 (0.36 - 0.88) | 0.0109                          | 122            | 4,101              | 0.63 (0.30 - 1.31) | 0.2161                          |
|                        | ≤9 year          | 277                        | 9,512              | 0.56 (0.36 - 0.88) | 0.0109                          | 122            | 4,101              | 0.63 (0.30 - 1.31) | 0.2161                          |
|                        | ≤10 year         | 277                        | 9,512              | 0.56 (0.36 - 0.88) | 0.0109                          | 122            | 4,101              | 0.63 (0.30 - 1.31) | 0.2161                          |
|                        | ≤26 year         | 277                        | 9,512              | 0.56 (0.36 - 0.88) | 0.0109                          | 122            | 4,101              | 0.63 (0.30 - 1.31) | 0.2161                          |
| Myocardial infarction  | ≤1 year          | 44                         | 10,958             | 0.38 (0.13 - 1.14) | 0.0841                          | 11             | 4,753              | 0.59 (0.03 - 11.5) | 0.7299                          |
|                        | ≤2 year          | 82                         | 10,920             | 0.40 (0.18 - 0.89) | 0.0239                          | 27             | 4,737              | 0.20 (0.04 - 0.99) | 0.0481                          |
|                        | ≤3 year          | 121                        | 10,881             | 0.39 (0.19 - 0.79) | 8.9E-03                         | 44             | 4,720              | 0.20 (0.05 - 0.80) | 0.0231                          |
|                        | ≤4 year          | 150                        | 10,852             | 0.45 (0.24 - 0.84) | 0.0126                          | 58             | 4,706              | 0.36 (0.12 - 1.14) | 0.0832                          |
|                        | ≤5 year          | 161                        | 10,841             | 0.50 (0.27 - 0.91) | 0.0232                          | 66             | 4,698              | 0.47 (0.17 - 1.30) | 0.1449                          |
|                        | ≤6 year          | 161                        | 10,841             | 0.50 (0.27 - 0.91) | 0.0232                          | 66             | 4,698              | 0.47 (0.17 - 1.30) | 0.1449                          |
|                        | ≤7 year          | 161                        | 10,841             | 0.50 (0.27 - 0.91) | 0.0232                          | 66             | 4,698              | 0.47 (0.17 - 1.30) | 0.1449                          |
|                        | ≤8 year          | 161                        | 10,841             | 0.50 (0.27 - 0.91) | 0.0232                          | 66             | 4,698              | 0.47 (0.17 - 1.30) | 0.1449                          |
|                        | ≤9 year          | 161                        | 10,841             | 0.50 (0.27 - 0.91) | 0.0232                          | 66             | 4,698              | 0.47 (0.17 - 1.30) | 0.1449                          |
|                        | ≤10 year         | 161                        | 10,841             | 0.50 (0.27 - 0.91) | 0.0232                          | 66             | 4,698              | 0.47 (0.17 - 1.30) | 0.1449                          |
|                        | ≤26 year         | 161                        | 10,841             | 0.50 (0.27 - 0.91) | 0.0232                          | 66             | 4,698              | 0.47 (0.17 - 1.30) | 0.1449                          |



These analyses were conducted in the combined cohort of the HKDR Study, the HKDB Phase 1 and 2 Studies.

**Model I (basic model):** study cohorts (HKDR Study, HKDB Phase 1 and 2 Studies), sex, age, duration of diabetes, enrolment year, and principal components.

**Model II (full model):** study cohorts (HKDR Study, HKDB Phase 1 and 2 Studies), sex, age, duration of diabetes, enrolment year, and principal components, smoking status, body mass index, waist-hip ratio, HBA1C, natural log transformed triglyceride levels, HDL-cholesterol, LDL-cholesterol, natural log transformed albumin-creatinine ratio, estimated glomerular filtration rate, status of hypertension, and drug usage (including lipid lowering drug, oral glucose lowering drugs and insulin treatment)

$P_{interaction}$  was the  $p$ -value of the interaction term obtained from the Cox regression model including two main effects (i.e. *PDE1A* rs10171703 and achievement of blood pressure target [i.e. SBP <130 mmHg and DBP <80 mmHg]), the interaction term of main effects, and the covariates (i.e. Models I and II).

HR corresponds to the effect of interaction term (hazard ratio) estimated from the Cox regression model

Event: patients had no history but incidence of outcome

Non-event: patients had neither history nor incidence of outcome

Follow-up time was calculated as the period from enrolment to the first outcome event, the date of death or particular follow-up period, whichever came first.

#### **Sensitivity analyses for testing the robustness of the interaction effect:**

- 1) We adjusted for additional potential confounders in the Cox regression model (i.e. compare Model I vs. Model II)
- 2) Since blood pressure may vary over time, we considered a short-term interaction effect on cardiovascular outcomes (i.e. considered a shorter period of follow-up)
- 3) To examine the concordance of the interaction effect, we conducted the analysis separately in the HKDR Study and the HKDB Study.

**Supplementary Table S11.** Associations of *PDE1A* rs10171703 with coronary heart disease and myocardial infarction, conditional on the known myocardial infarction-related variant rs12693302 at *PDE1A* locus in Chinese patients with type 2 diabetes.

| SNP<br>(Risk/ other alleles)  | RAF   |       | Conditional SNP | Cohort             | LD $r^2$ | N            |              | RAF   |         | Unconditional analysis    |                            |               | Conditional analysis      |                            |               |
|-------------------------------|-------|-------|-----------------|--------------------|----------|--------------|--------------|-------|---------|---------------------------|----------------------------|---------------|---------------------------|----------------------------|---------------|
|                               | EAS   | EUR   |                 |                    |          | Case         | Control      | Case  | Control | OR (95% CI)               | $P_{additive}$             | $P_{het}$     | OR (95% CI)               | $P_{additive}$             | $P_{het}$     |
| <i>Coronary heart disease</i> |       |       |                 |                    |          |              |              |       |         |                           |                            |               |                           |                            |               |
| rs10171703<br>(C/T)           | 0.782 | 0.464 | rs12693302†     | HKDR Study         | 0.217    | 1,358        | 3,528        | 0.793 | 0.758   | 1.22 (1.09 - 1.35)        | 4.3×10 <sup>-4</sup>       | --            | 1.26 (1.12 - 1.42)        | 1.7×10 <sup>-4</sup>       | --            |
|                               |       |       |                 | HKDB Phase 1 Study | 0.202    | 1,159        | 2,896        | 0.787 | 0.752   | 1.26 (1.12 - 1.43)        | 2.2×10 <sup>-4</sup>       | --            | 1.23 (1.07 - 1.42)        | 2.9×10 <sup>-3</sup>       | --            |
|                               |       |       |                 | HKDB Phase 2 Study | 0.245    | 1,079        | 2,474        | 0.791 | 0.761   | 1.17 (1.03 - 1.32)        | 0.0154                     | --            | 1.16 (1.00 - 1.34)        | 0.0475                     | --            |
|                               |       |       |                 | Meta-analysis      | --       | <b>3,596</b> | <b>8,898</b> | --    | --      | <b>1.21 (1.13 - 1.30)</b> | <b>2.4×10<sup>-8</sup></b> | <b>0.6777</b> | <b>1.22 (1.13 - 1.32)</b> | <b>3.2×10<sup>-7</sup></b> | <b>0.6633</b> |
| rs12693302†<br>(G/A)          | 0.583 | 0.324 | rs10171703      | HKDR Study         | 0.217    | 1,358        | 3,528        | 0.575 | 0.570   | 1.02 (0.93 - 1.11)        | 0.7227                     | --            | 0.93 (0.84 - 1.03)        | 0.1747                     | --            |
|                               |       |       |                 | HKDB Phase 1 Study | 0.202    | 1,159        | 2,896        | 0.612 | 0.587   | 1.14 (1.02 - 1.27)        | 0.0186                     | --            | 1.05 (0.93 - 1.18)        | 0.4743                     | --            |
|                               |       |       |                 | HKDB Phase 2 Study | 0.245    | 1,079        | 2,474        | 0.600 | 0.578   | 1.08 (0.97 - 1.21)        | 0.1528                     | --            | 1.02 (0.89 - 1.15)        | 0.8180                     | --            |
|                               |       |       |                 | Meta-analysis      | --       | <b>3,596</b> | <b>8,898</b> | --    | --      | <b>1.07 (1.01 - 1.14)</b> | <b>0.0227</b>              | <b>0.2838</b> | <b>0.99 (0.92 - 1.06)</b> | <b>0.7069</b>              | <b>0.3221</b> |
| <i>Myocardial infarction</i>  |       |       |                 |                    |          |              |              |       |         |                           |                            |               |                           |                            |               |
| rs10171703<br>(C/T)           | 0.782 | 0.464 | rs12693302†     | HKDR Study         | 0.217    | 861          | 3,528        | 0.789 | 0.758   | 1.19 (1.04 - 1.35)        | 9.0×10 <sup>-3</sup>       | --            | 1.22 (1.06 - 1.41)        | 6.2×10 <sup>-3</sup>       | --            |
|                               |       |       |                 | HKDB Phase 1 Study | 0.202    | 340          | 2,880        | 0.794 | 0.751   | 1.36 (1.10 - 1.67)        | 4.1×10 <sup>-3</sup>       | --            | 1.31 (1.04 - 1.66)        | 0.0203                     | --            |
|                               |       |       |                 | HKDB Phase 2 Study | 0.245    | 282          | 2,359        | 0.796 | 0.762   | 1.19 (0.96 - 1.48)        | 0.1199                     | --            | 1.25 (0.98 - 1.60)        | 0.0756                     | --            |
|                               |       |       |                 | Meta-analysis      | --       | <b>1,483</b> | <b>8,767</b> | --    | --      | <b>1.22 (1.11 - 1.35)</b> | <b>5.5×10<sup>-5</sup></b> | <b>0.5413</b> | <b>1.25 (1.12 - 1.39)</b> | <b>7.3×10<sup>-5</sup></b> | <b>0.8624</b> |
| rs12693302†<br>(G/A)          | 0.583 | 0.324 | rs10171703      | HKDR Study         | 0.217    | 861          | 3,528        | 0.576 | 0.570   | 1.02 (0.92 - 1.14)        | 0.6976                     | --            | 0.95 (0.84 - 1.07)        | 0.3803                     | --            |
|                               |       |       |                 | HKDB Phase 1 Study | 0.202    | 340          | 2,880        | 0.618 | 0.588   | 1.19 (0.99 - 1.42)        | 0.0625                     | --            | 1.06 (0.87 - 1.30)        | 0.5524                     | --            |
|                               |       |       |                 | HKDB Phase 2 Study | 0.245    | 282          | 2,359        | 0.580 | 0.577   | 1.00 (0.83 - 1.21)        | 0.9678                     | --            | 0.91 (0.73 - 1.13)        | 0.3933                     | --            |
|                               |       |       |                 | Meta-analysis      | --       | <b>1,483</b> | <b>8,767</b> | --    | --      | <b>1.05 (0.97 - 1.14)</b> | <b>0.2377</b>              | <b>0.3283</b> | <b>0.96 (0.88 - 1.06)</b> | <b>0.4413</b>              | <b>0.5330</b> |

Association was assessed by logistic regression with adjustments for sex, age and principal components.

Results obtained from the individual cohorts were meta-analysed under a fixed effect model

ORs and 95% CIs were reported according to the CHD-related risk allele (C-allele) of *PDE1A* rs10171703

$P_{het}$  refers to the  $p$ -value obtained from the heterogeneity test (Cochran’s Q test)

RAF: Risk allele frequency

† **Reference:** Hartiala JA *et al.* Genome-wide analysis identifies novel susceptibility loci for myocardial infarction. *Eur Heart J.* 2021 Mar 1;42(9):919-933.

**Supplementary Table S12.** Associations between the peak eQTL SNP at *PDEIA* locus and *PDEIA* expression in the adipose ( $n = 581$ ) and skin tissues ( $n = 605$ ), using data from the GTEx portal.

| Tissue                         | Peak eQTL SNP at <i>PDEIA</i> |     |                        |          |               |                      |                      | <i>PDEIA</i> rs10171703 (chr2:183343102) |               |                      |                      |                                  |
|--------------------------------|-------------------------------|-----|------------------------|----------|---------------|----------------------|----------------------|------------------------------------------|---------------|----------------------|----------------------|----------------------------------|
|                                | SNP                           | Chr | Position<br>(Build 37) | EA / NEA | NES ± SE      | $P_{eQTL}$           | $P_{threshold}$      | EA / NEA                                 | NES ± SE      | $P_{eQTL}$           | $P_{threshold}$      | LD $r^2$ with Peak<br>SNP in EAS |
| Adipose - Subcutaneous         | rs4091077                     | 2   | 183312302              | G/A      | 0.120 ± 0.029 | 3.2×10 <sup>-5</sup> | 2.6×10 <sup>-4</sup> | C/T                                      | 0.110 ± 0.028 | 1.1×10 <sup>-4</sup> | 2.6×10 <sup>-4</sup> | 0.511                            |
| Skin - Sun Exposed (Lower leg) | rs934260                      | 2   | 183377037              | G/A      | 0.190 ± 0.035 | 6.5×10 <sup>-8</sup> | 3.2×10 <sup>-4</sup> | C/T                                      | 0.091 ± 0.025 | 2.0×10 <sup>-4</sup> | 3.2×10 <sup>-4</sup> | 0.021                            |

EA: effect allele; NEA: non-effect allele

LD: Linkage disequilibrium  $r^2$  between the peak eQTL SNP and the top variant rs10171703 identified in the present study.

The normalized effect size (NES) of the eQTL is defined as the slope (i.e.  $\beta$ -coefficient) of the linear regression between genotype and expression, and is computed as the effect of the alternative C-allele relative to the reference T-allele.

$P_{eQTL}$  were obtained for each variant-gene pair by testing the null hypothesis that NES is equal to zero.

$P_{threshold}$  is the false discovery rate (FDR) threshold applied to identify genes with a significant eQTL.

**Supplementary Table S13.** Associations of genetically predicted PDE1A expression with CHD risk in GTEx tissue types.

| <b>Tissue</b>                             | <b>Z-score</b> | <b>P-value</b>           |
|-------------------------------------------|----------------|--------------------------|
| Adipose - Subcutaneous                    | 0.244          | 0.807                    |
| Brain - Cerebellar Hemisphere             | -0.136         | 0.892                    |
| Brain - Cortex                            | 0.083          | 0.933                    |
| Brain - Hippocampus                       | -0.301         | 0.763                    |
| Brain - Hypothalamus                      | -0.258         | 0.796                    |
| Brain - Nucleus accumbens (basal ganglia) | 0.476          | 0.634                    |
| Brain - Spinal cord (cervical c-1)        | 0.436          | 0.663                    |
| Brain - Substantia nigra                  | 0.513          | 0.608                    |
| Breast - Mammary Tissue                   | 1.119          | 0.263                    |
| Cells - Cultured fibroblasts              | -0.244         | 0.807                    |
| Esophagus - Muscularis                    | 2.347          | 0.019                    |
| Heart - Atrial Appendage                  | -0.244         | 0.807                    |
| Muscle - Skeletal                         | 1.116          | 0.264                    |
| Nerve - Tibial                            | 0.105          | 0.916                    |
| Ovary                                     | -0.054         | 0.957                    |
| Pituitary                                 | -0.244         | 0.807                    |
| Skin - Sun Exposed (Lower leg)            | 0.054          | 0.957                    |
| Thyroid                                   | -2.645         | $8.0 \times 10^{-3}$     |
| <b>Meta-analysis</b>                      |                | <b>0.035<sup>†</sup></b> |

Only tissues with valid expression model for *PDE1A* were listed.

<sup>†</sup> Meta-analysis of the associations across the tissues listed while factoring correlation among tissues. Statistical significance was estimated by S-MultiXcan.
